# Supplementary material for: Preliminary assessment of bioaccessibility of HBCDs from Human GIT following indoor dust ingestion using a colon extended physiologically based extraction test (CEPBET)
Source: HighWire-hosted journal article supplement (doi:10.1101/gr.3739005), 2009-01-01
Supplement: Compiled_supplemental_material_submitted_022205_Irwin_GR.pdf [file Compiled_supplemental_material_submitted_022205_Irwin_GR.pdf]

## Supplemental Methods

**Description of GOnet.** We have constructed a database with a Web interface that integrates genomic and proteomic information across several other existing databases. Information about yeast ORFs and their annotations, GO terms, and protein interactions are stored, and periodically refreshed, in an open-source relational database—implemented using MySQL (<http://www.mysql.com/>) and other publicly available, open source, tools. The database retrieves information about ORFs (description, mutant phenotype, gene product, etc.) from the SGD available at <http://www.yeastgenome.org/>.

SGD provides an anonymous FTP site (<ftp://genome-ftp.stanford.edu/pub/yeast/>) which allows users to download a gene registry file that has detailed information of named genes ([ftp://genome-ftp.stanford.edu/pub/yeast/data\\_download/gene\\_registry/registry.genenames.tab](ftp://genome-ftp.stanford.edu/pub/yeast/data_download/gene_registry/registry.genenames.tab)), and another file ([ftp://genome-ftp.stanford.edu/pub/yeast/data\\_download/chromosomal\\_feature/chromosomal\\_feature.tab](ftp://genome-ftp.stanford.edu/pub/yeast/data_download/chromosomal_feature/chromosomal_feature.tab)) which includes information about dubious ORFs.

We run a redundancy check on these data and whenever an ORF is present in both files we retain the more informative version contained in the registry.genenames.tab file as input. The GO term files are downloaded from the Gene Ontology Consortium's website (<http://www.geneontology.org/>). The GO hierarchy is retrieved and analyzed by parsing the corresponding XML tags. A suite of Perl scripts (<http://www.perl.org>) is used to parse the ORF information files, extract useful information, and link each ORF with the corresponding GO information, if available.

The General Repository for Interaction Datasets (GRID), which is available at <http://biodata.mshri.on.ca/grid/servlet/Index>, provides genetic and physical interactions information. Registered users of their website can download a text file which contains information about protein-protein interactions, the experimental methods by which the information was derived (e.g. yeast two-hybrid) information, and related resources. Interactions included in this file are not fully symmetric. For example, in the current version, *YHR151C* interacts with *YNL193W*, but *YNL193W* does not interact with *YHR151C*. This is an experimental and data-entry artifact that we correct by adding all the missing symmetric interactions to the file to produce a final symmetric set of interactions, as reflected in the online version of the GRID database

Based on the interactions from GRID, we link each gene in an interacting pair to their SGD and GO information. For each pair of genes, the levels of relatedness of the GO terms are also computed, to determine how closely these terms are related in the GO tree hierarchy. For instance, in Molecular Function GO terms, “molecular\_function” is at level 1, “kinase activity” is at level 2, and “amino acid kinase activity” and “carbohydrate kinase activity” are at level 3. Because “amino acid kinase activity” and “carbohydrate kinase activity” share the same immediate upper level —“kinase activity” (level 2), these two terms are considered to be related at level 2.

The Web interface to the database is developed using JavaScript and PHP, which is a widely used general-purpose, open-source scripting language that is especially suited for Web development (<http://www.php.net>), and has built-in interface for MySQL. Its basic functionality is to allow users to rapidly cluster genes by using interaction and GO hierarchy information. More precisely, the query form allows users to:

- (1) Enter a list of genes;
- (2) Enter GO terms or possible keywords in GO terms for each category—Molecular Function, Biological Process, and/or Cellular Component;
- (3) Enter GO terms or possible keywords without specifying which category they belong to;
- (4) Select different levels of relatedness within the GO hierarchy for Function, Process, and/or Component;
- (5) Select the experimental method(s) used to establish interactions (e.g. yeast two-hybrid versus all methods);
- (6) Limit the results to those ORFs which appear both in the input (query) list and in the output (interaction) list.

Users can sort the results by ORF names or by the three categories of GO terms. Results can also be downloaded as tab-delimited text files which can be opened in Excel. We provide the text files with a variety of sorting options such as by ORF name, by interacting gene's name, and by Function GO term. If a user chooses to limit the results to ORFs appearing both in the input (query) and output (interaction) list but stills want to see which ones are present in the input only, he/she can do so by following a link on the result page.

Submission of a query immediately produces a list of genes satisfying the corresponding criteria. Each hit provides not only the names of the interacting genes GO terms, and gene details, but also automatically provides an hyperlink to the corresponding information in the SGD database. It allows users to rapidly and fairly exhaustively (up to errors in the original data) explore small clusters of interacting genes with similar GO

classifications and therefore find those genes which are likely to participate in the same processes, functions, or pathways.

On the website, genes are also grouped according to their GO terms. The grouping is based on GO information stored in the database and their relative positions in the GO hierarchy. For each category of GO terms (Function, Process and Component), different levels of specificity are used. For example, in the category of Molecular Function, at level 1 there is a link to genes grouped by “binding”, which includes genes participating in all the bindings in all of its sub-levels—not only level 2, but also 3, 4, etc., such as amino acid binding, cellulose binding, and peptide antigen binding; at level 2, there is a link to genes grouped by “nucleic acid binding” which includes genes participating in all the sub-levels of nucleic acid binding; at level 3, there is a link to genes grouped by “RNA binding”; at level 4, there is a link to genes grouped by “mRNA binding”. Users can also find details of each gene, such as the names of interacting genes, phenotype, function, process and component GO terms, etc.

We also provide a function that allows users to automatically retrieve sequences and blast them against the mouse or human genome using the Blastp program and the NCBI Blast servers. This function is particularly useful when applied to multiple ORFs. It is implemented using Perl LWP (<http://lwp.linpro.no/lwp/>) and the URLAPI package (<http://www.ncbi.nlm.nih.gov/BLAST/Doc/urlapi.html>) from NCBI. If the “Generate a summary” option is not selected, then the result page lists the relevant ORFs with links to each blast results on the NCBI server. If the “Generate a summary” option is selected, then a summary report is generated within typically a few minutes. The report displays

information such as total number of hits (or no hits) and the details of each hit (P value, E value, and links) for each ORF.

### **Supplemental Figure Legends**

**Fig. 1.** Ty3 Gag3, IN and cDNA intermediates in 66 knockout mutants. Mutants representing nine of the functional categories of genes recovered in the screen were assayed as described in Materials and Methods in two independent transformants for Ty3 proteins (Gag3, p27, CA, and IN) and cDNA (with the exception of three mutants). Cells were initially induced in mid-log phase cultures and were grown under inducing conditions for 24 h. Eight independent wt transformants were used as controls. On each of the Western and Southern blots pools of three different transformants were used on each side of the blot. For Western analysis blots have been reconstructed here (as indicated by dividing lines) to better group similar functions and include cases where individual samples were reprepared due to technical problems. The original blots are available upon request. Blots shown were exposed so that the wt CA, IN and PGK controls were similar intensity among the blots, but these results are considered qualitative rather than quantitative. cDNA levels are expressed in the bar graph as the ratio of Ty3 cDNA to plasmid. The wt control value ( $0.57 \pm 0.31$ ) represents an average of eight independent transformants. The mutant values represent the average of two independent transformants. In three cases, protein and Southern analysis is based on one rather than two mutants as it appeared the mutant had little or no Ty3 plasmid present. Results from these blots are summarized in Fig. 3 and Supplemental Table 3.

## Reference List

1. Scholes, D. T., Banerjee, M., Bowen, B. & Curcio, M. J. (2001) *Genetics* **159**, 1449-1465.
2. von Schwedler, U. K., Stuchell, M., Muller, B., Ward, D. M., Chung, H. Y., Morita, E., Wang, H. E., Davis, T., He, G. P., Cimbor, D. M. *et al.* (2003) *Cell* **114**, 701-713.
3. Odorizzi, G., Katzmann, D. J., Babst, M., Audhya, A. & Emr, S. D. (2003) *Journal of Cell Science* **116**, 1893-1903.

Nuclear Transport

Western

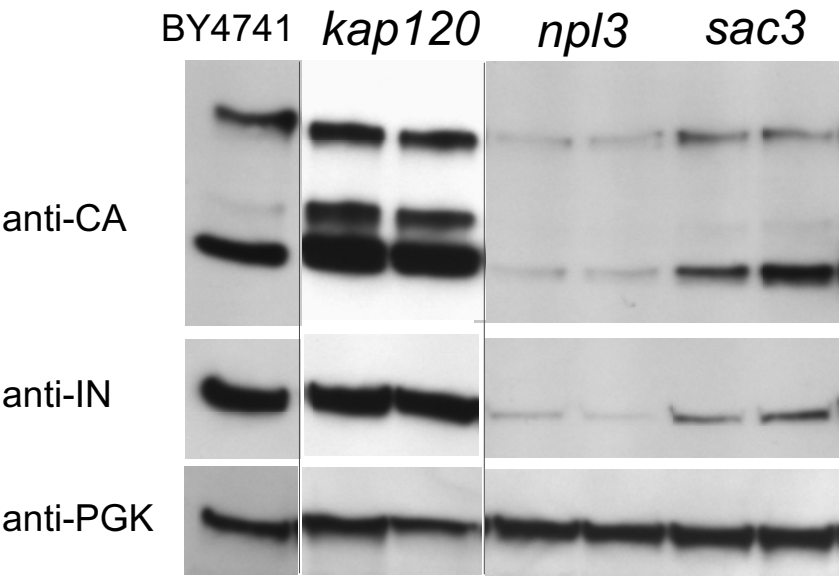

Southern

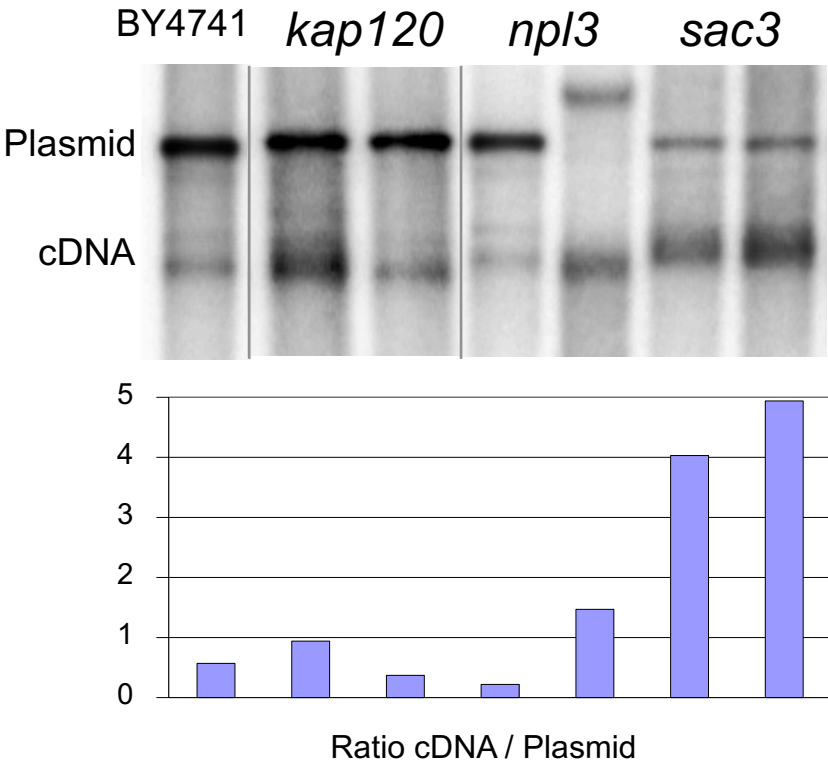

Nuclear Transport

Western

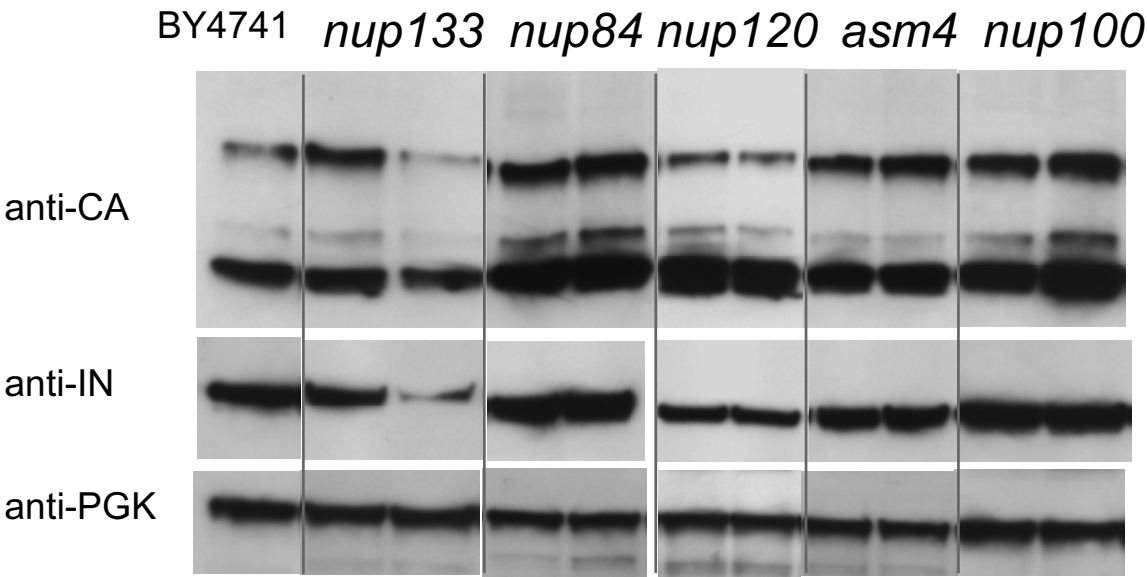

Southern

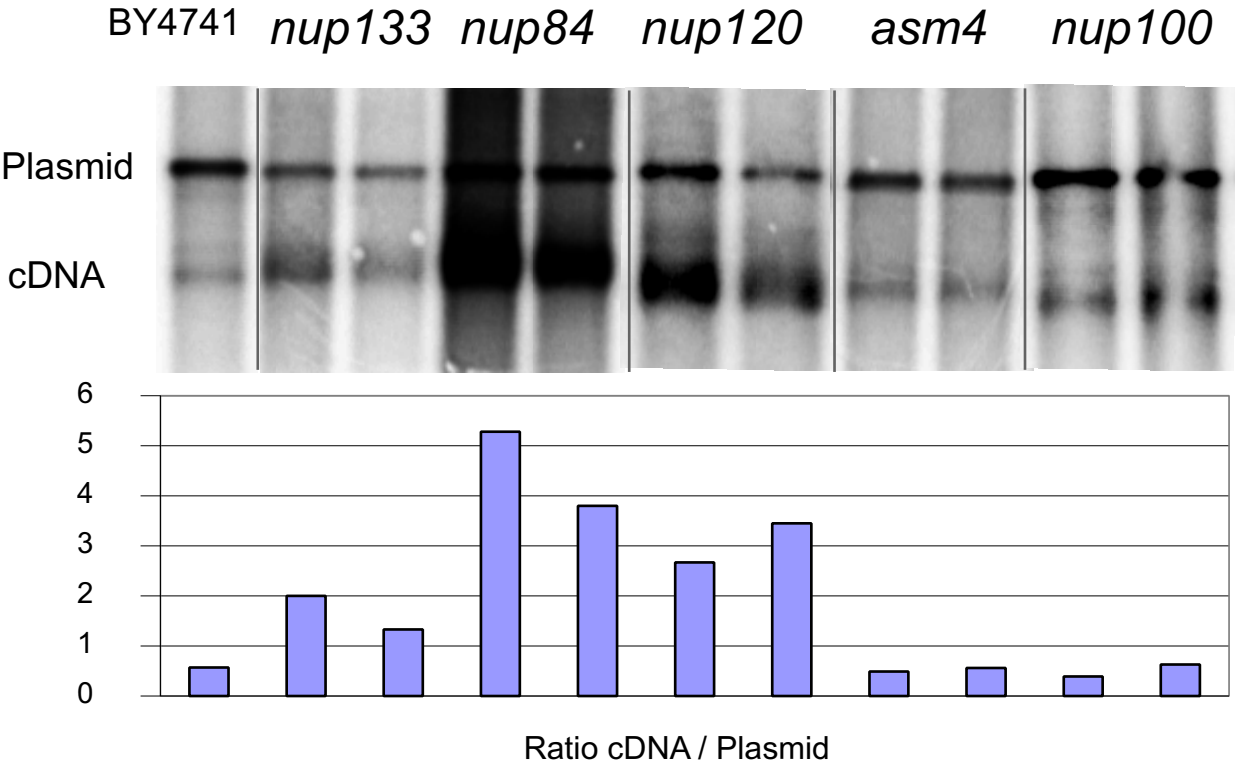

# Translation

## Western

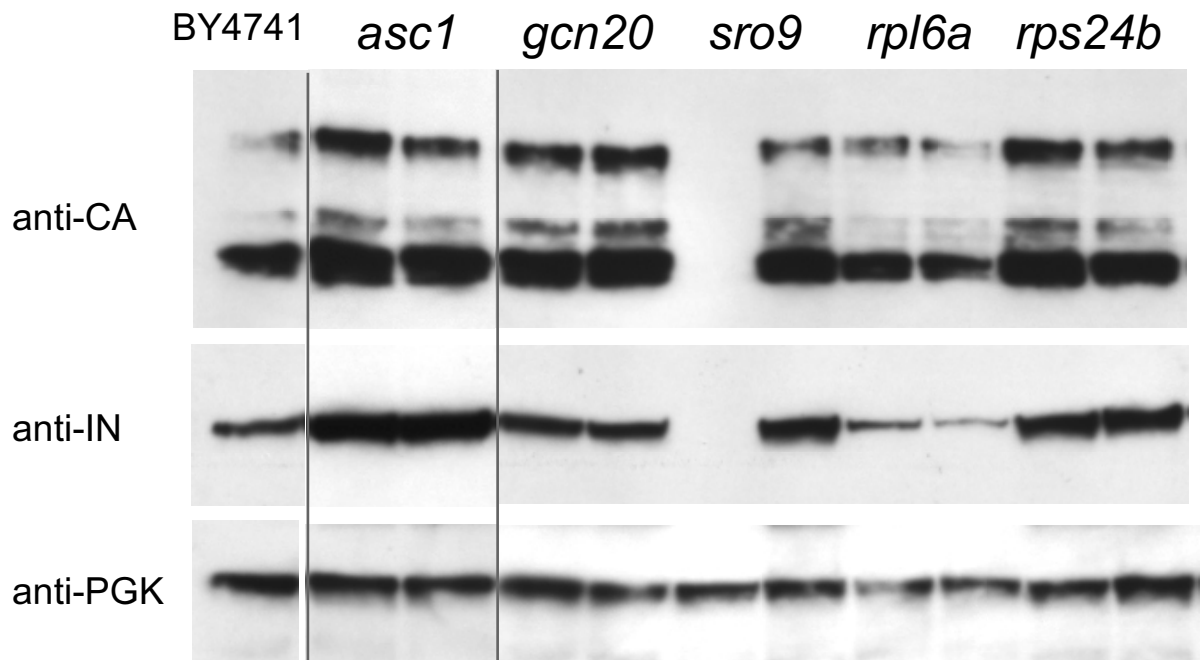

## Southern

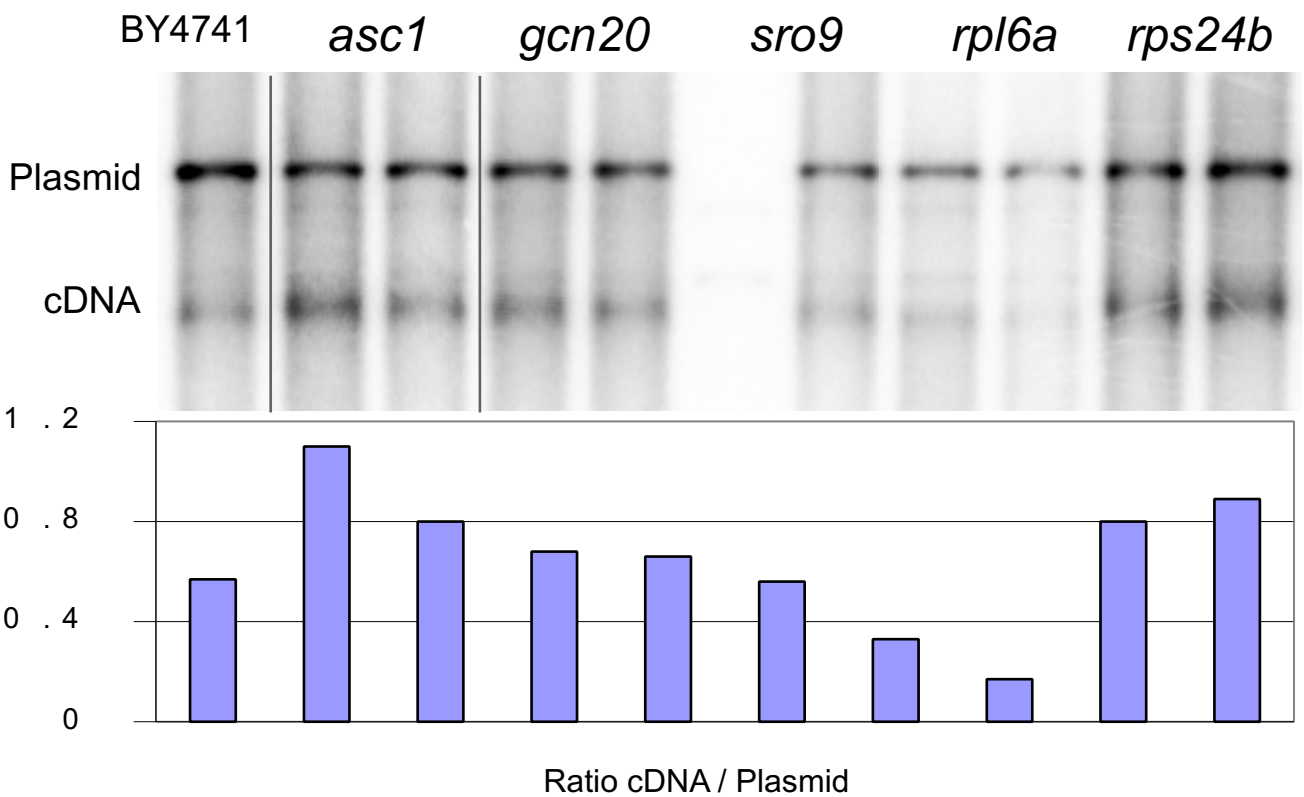

# RNA Processing

## Western

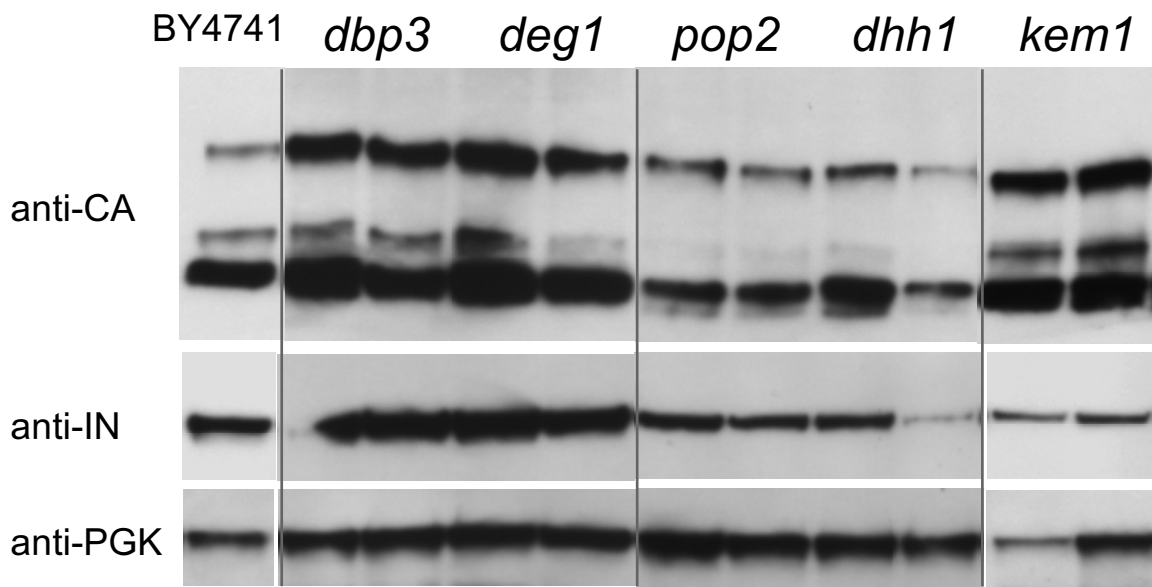

## Southern

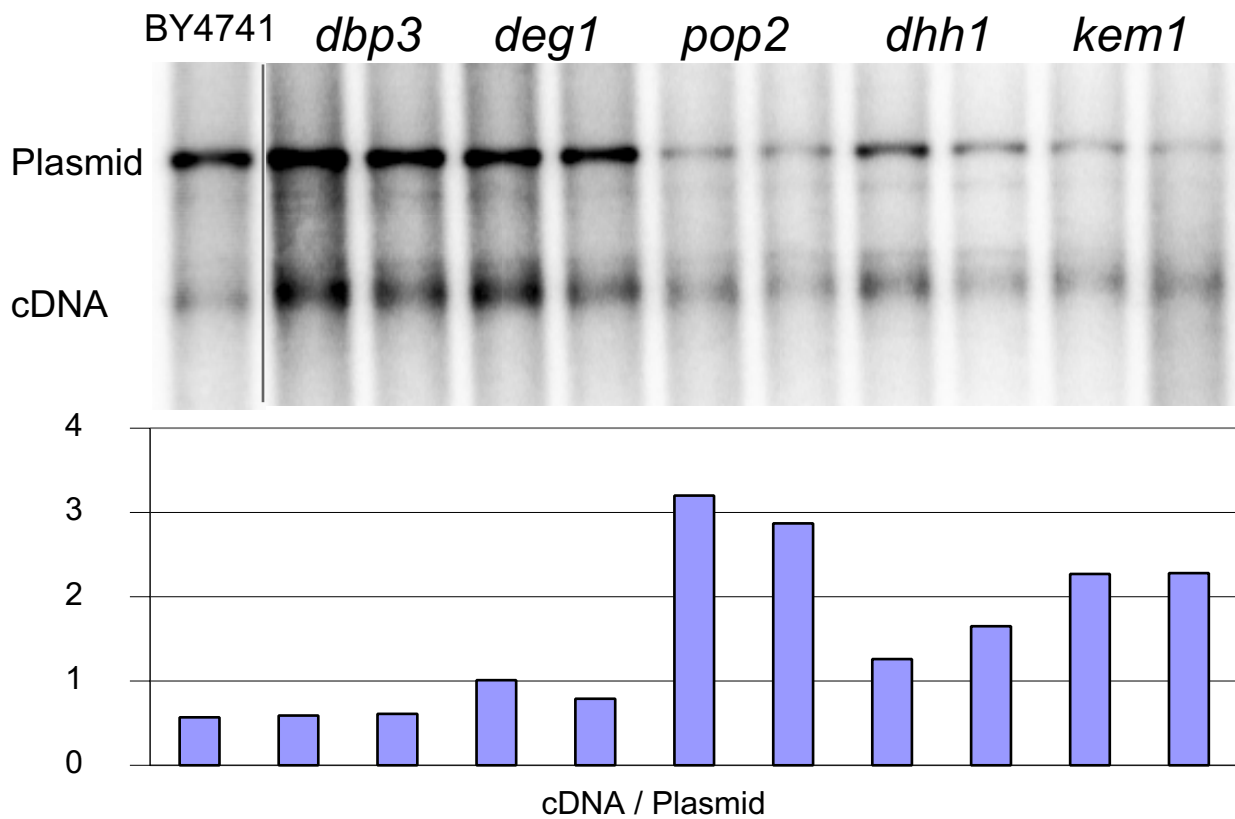

# Secretion / Vesicular Trafficking / Vacuolar

## Western

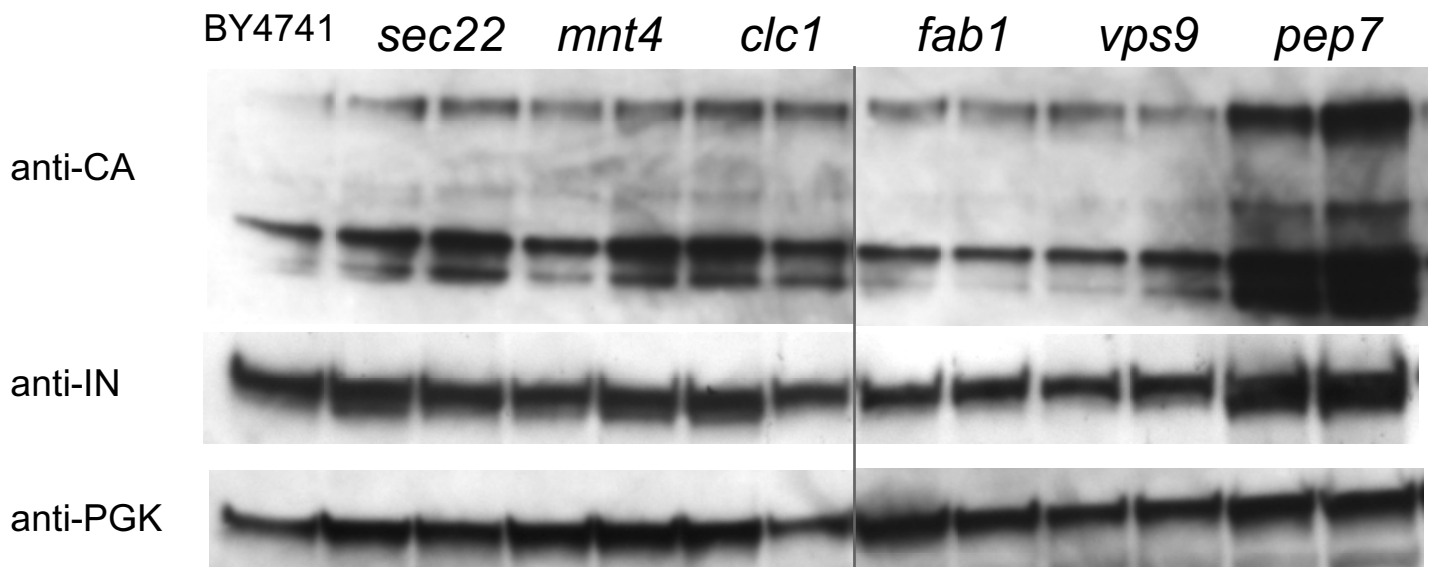

## Southern

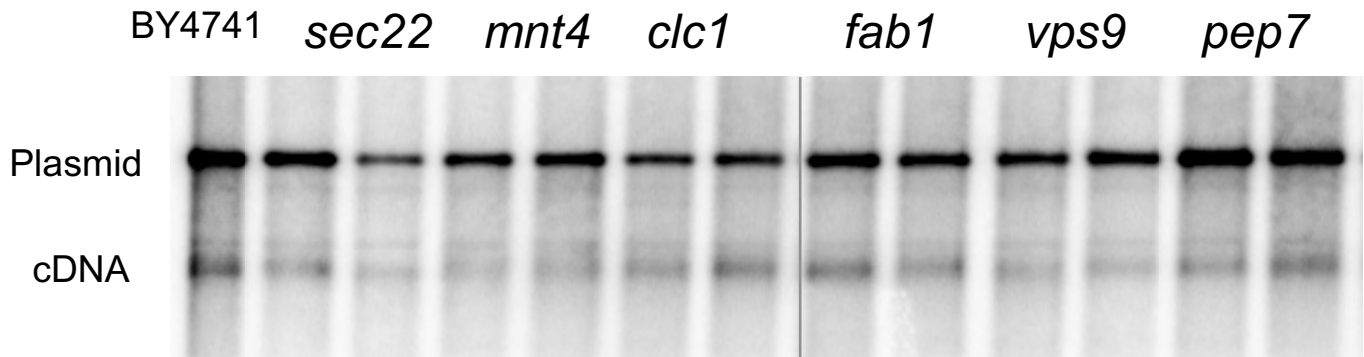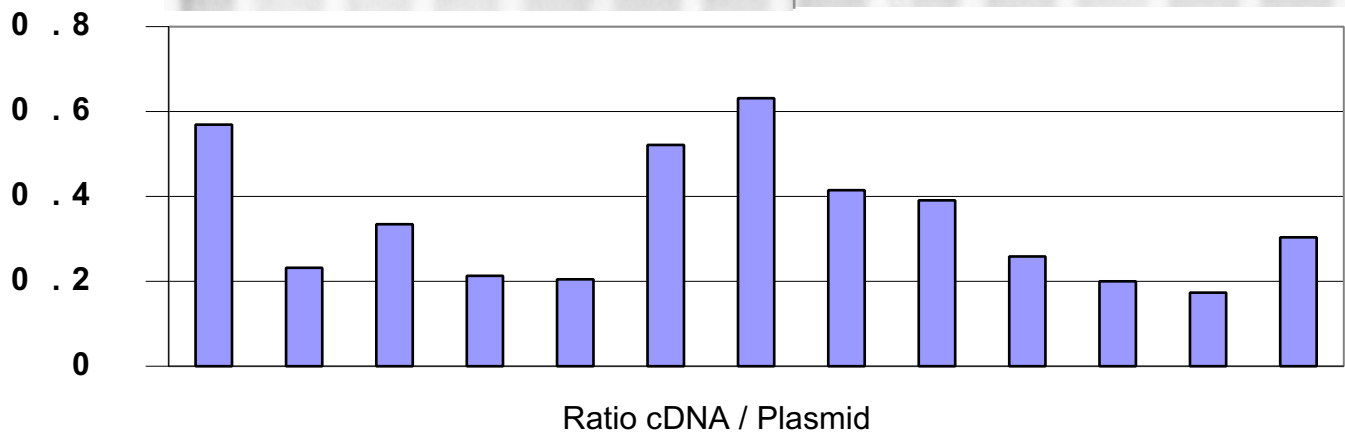

# Secretion / Vesicular Trafficking / Vacuolar

## Western

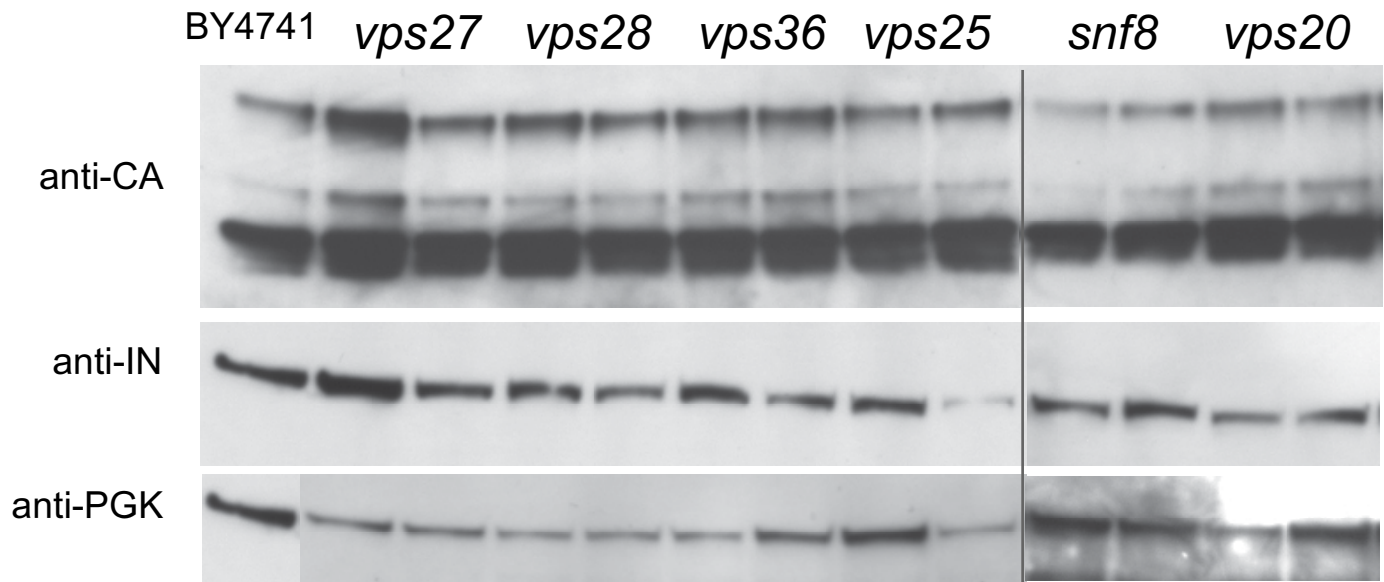

## Southern

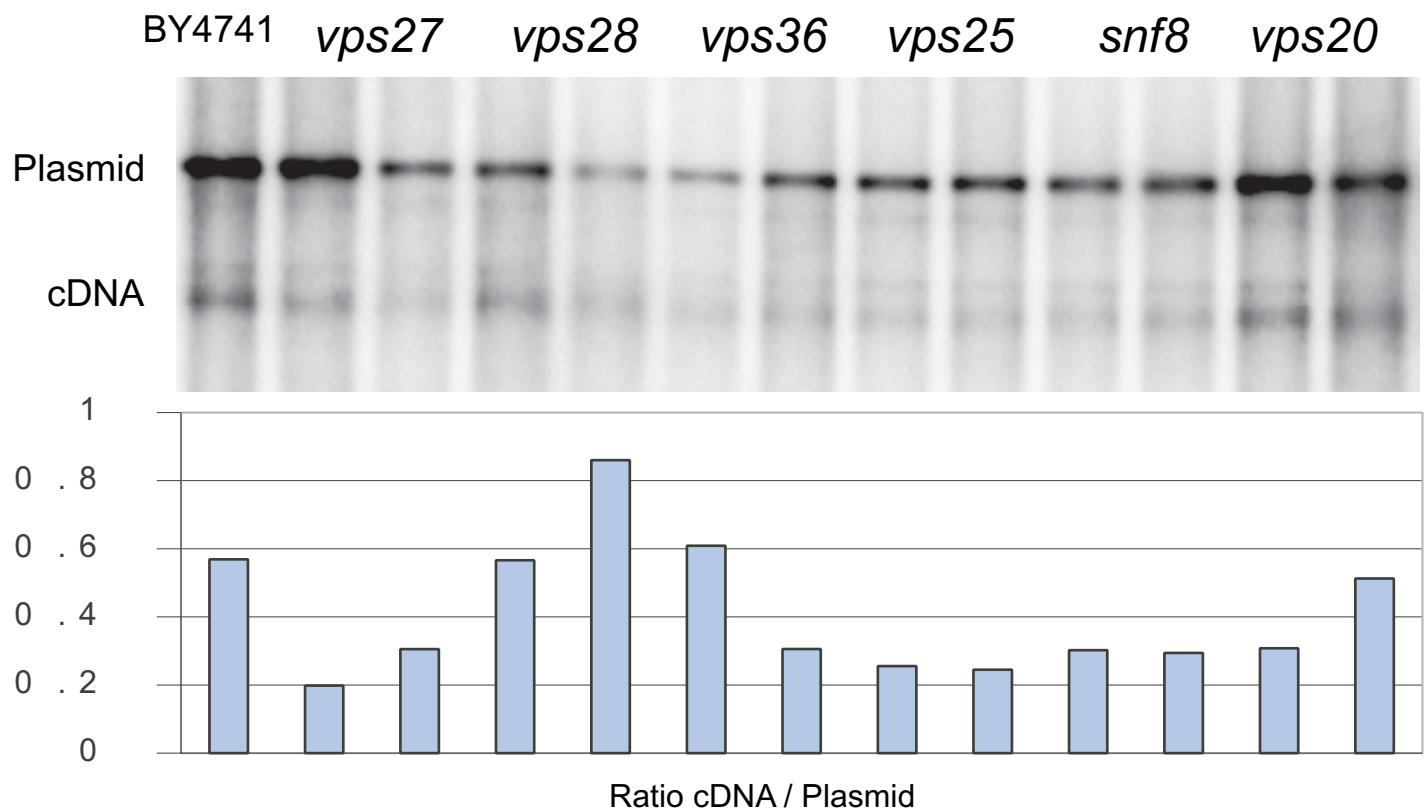

Secretion / Vesicular Trafficking / Vacuolar

Western

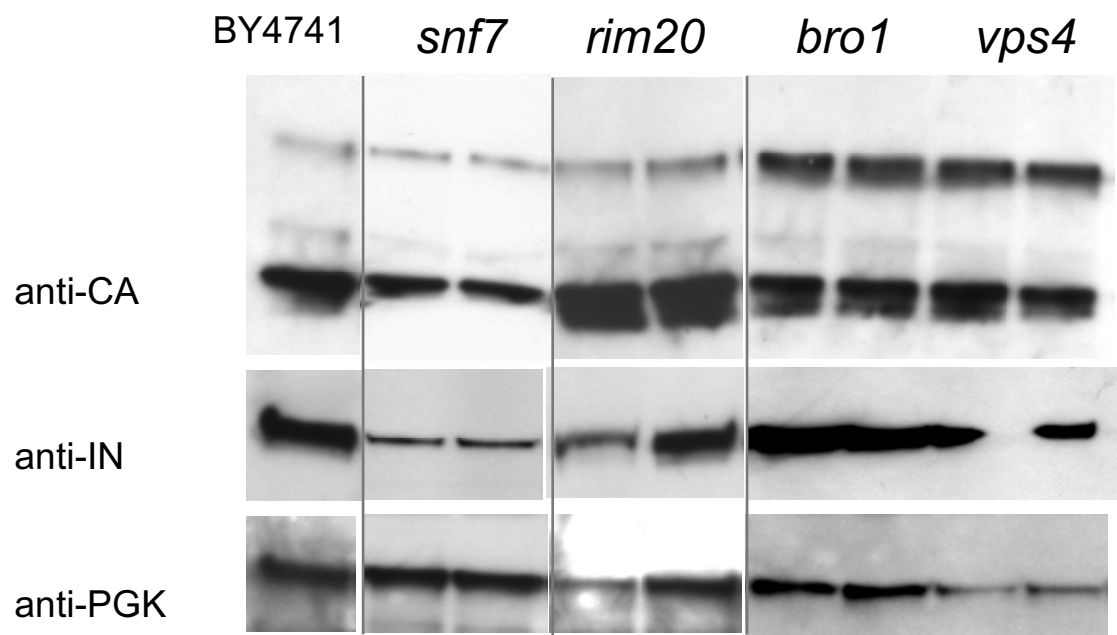

Southern

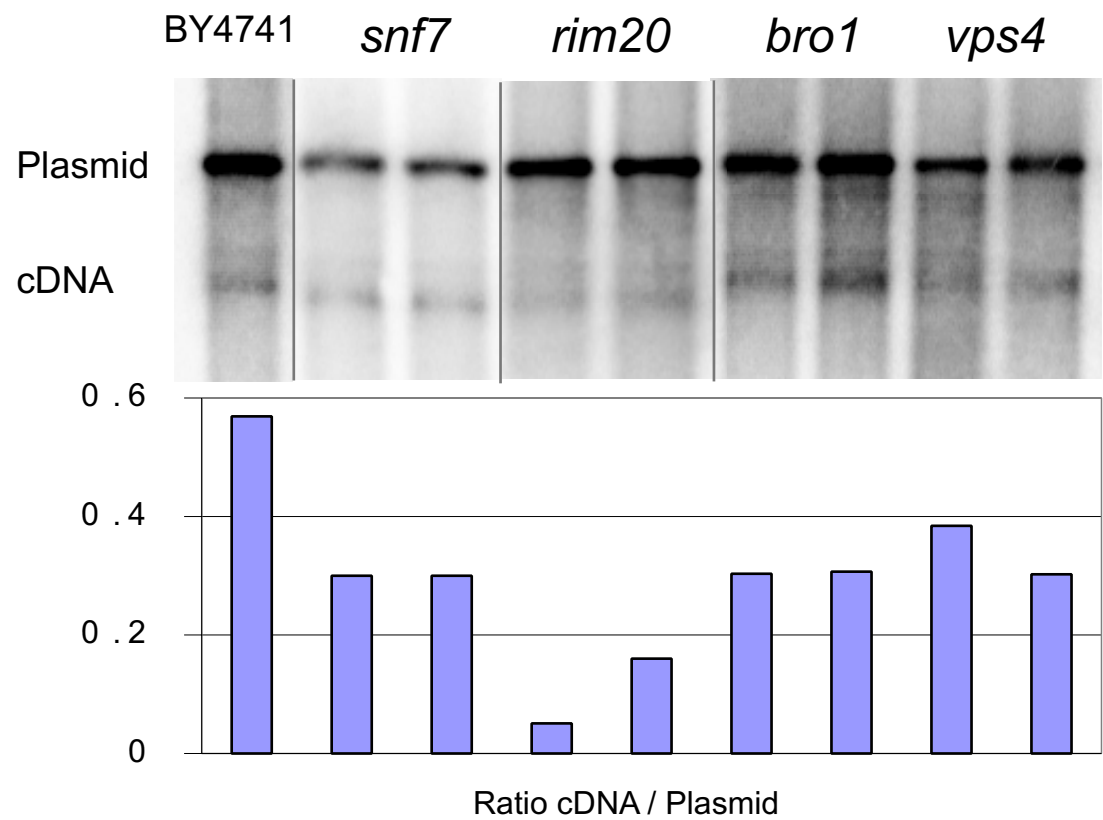

Secretion / Vesicular Trafficking / Vacuolar

Western

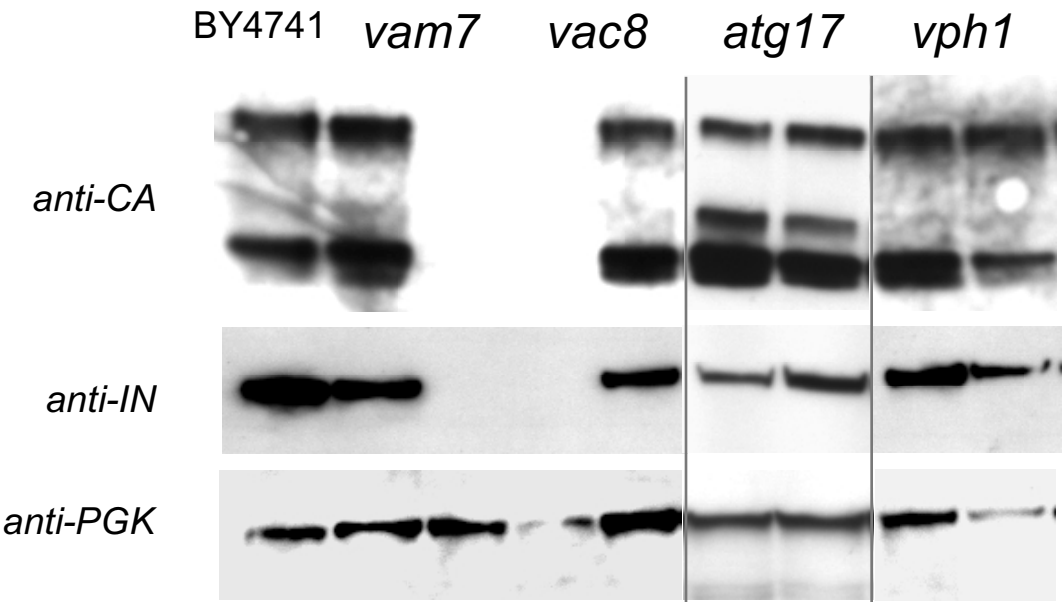

Southern

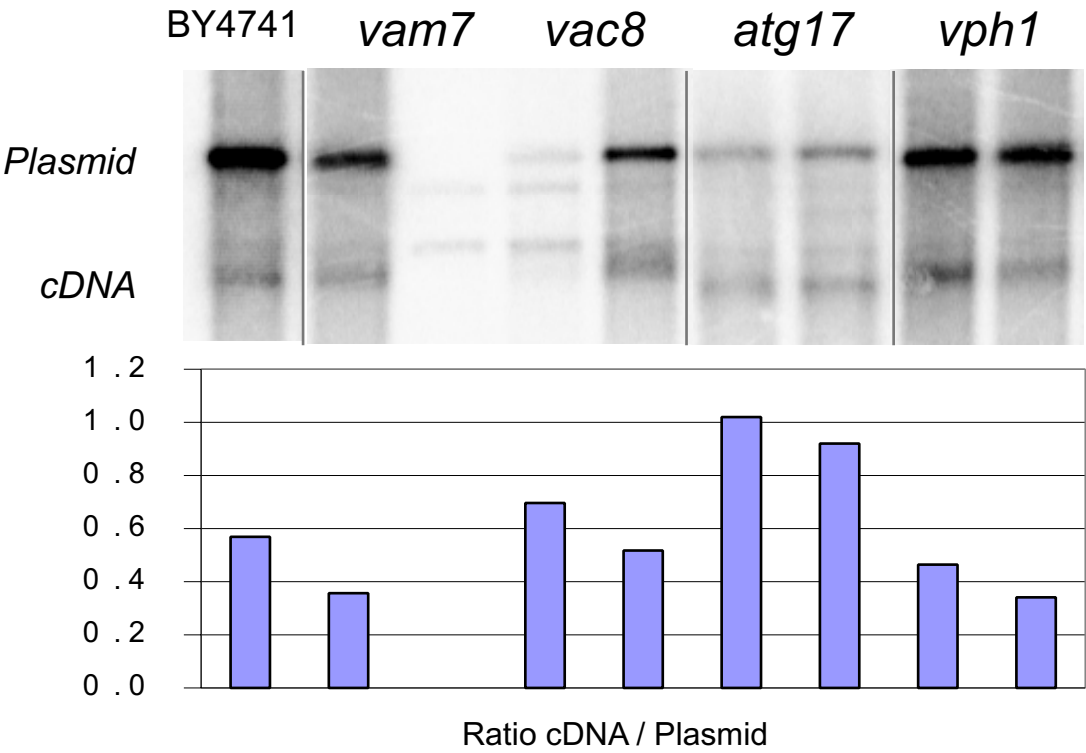

# Ty1 and DNA Maintenance

## Western

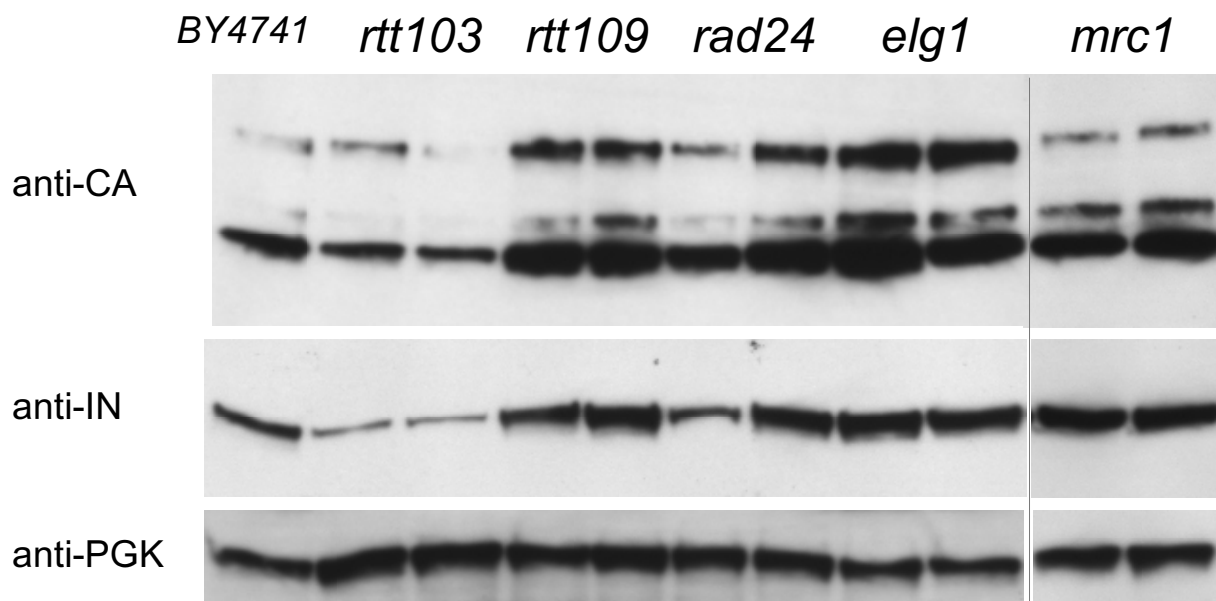

## Southern

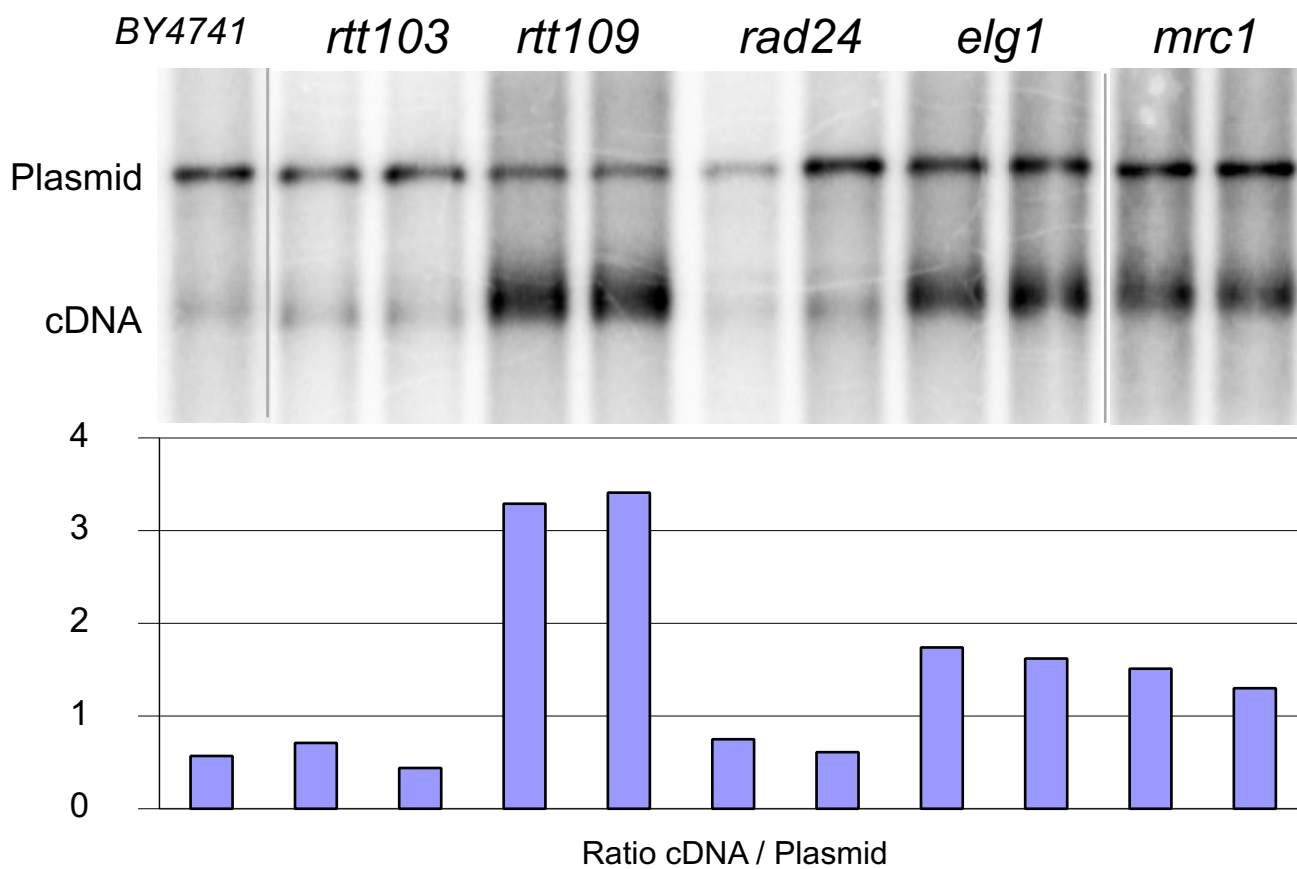

# DNA Maintenance

## Western

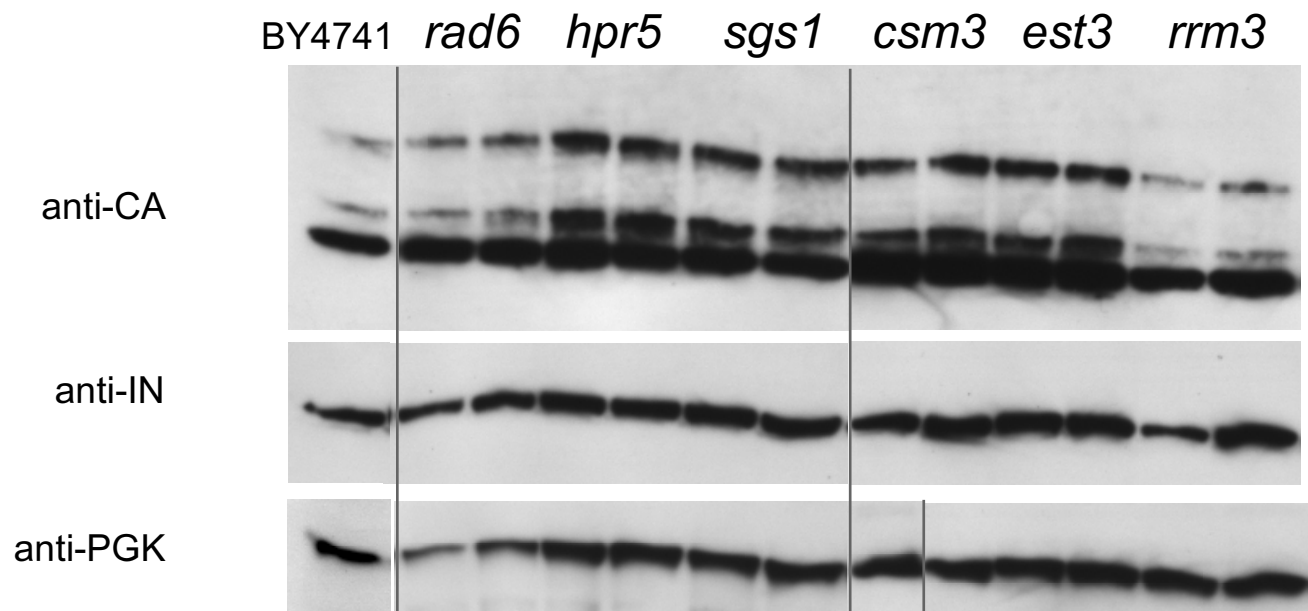

## Southern

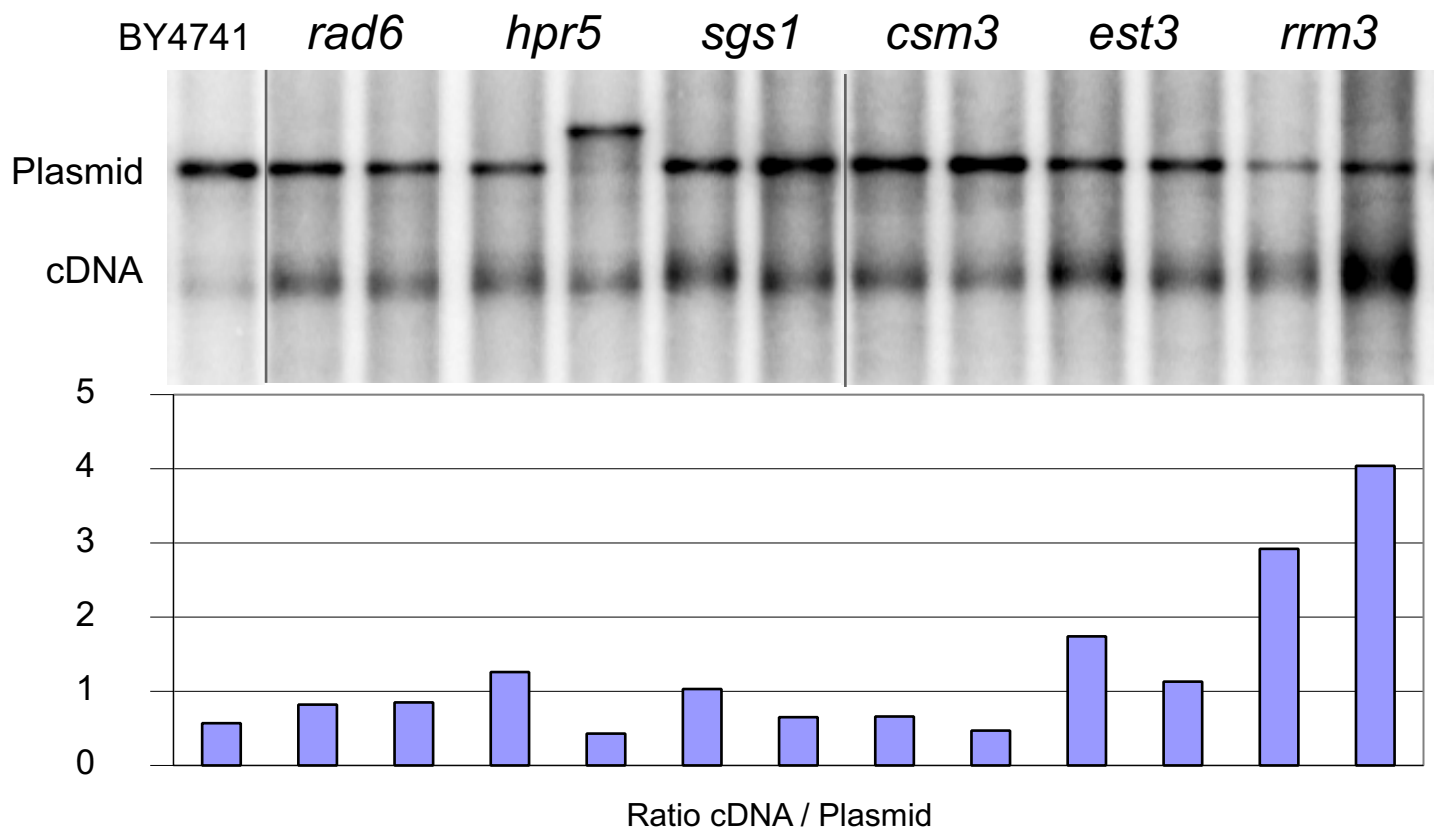

Cytoskeleton

Western

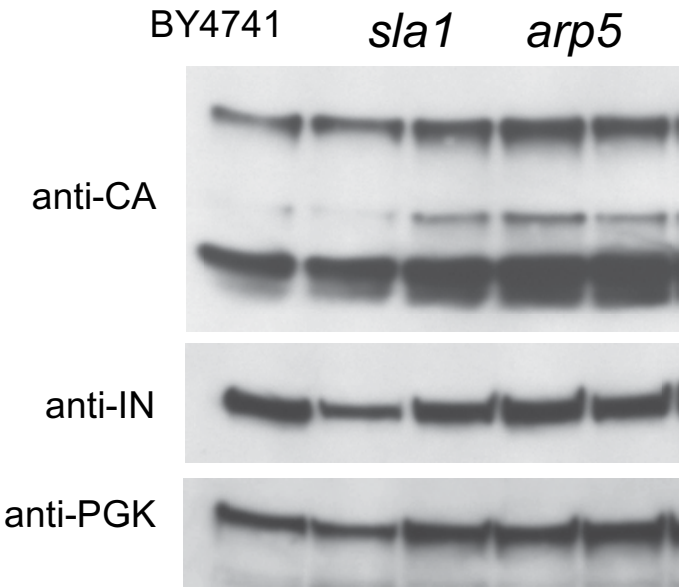

Southern

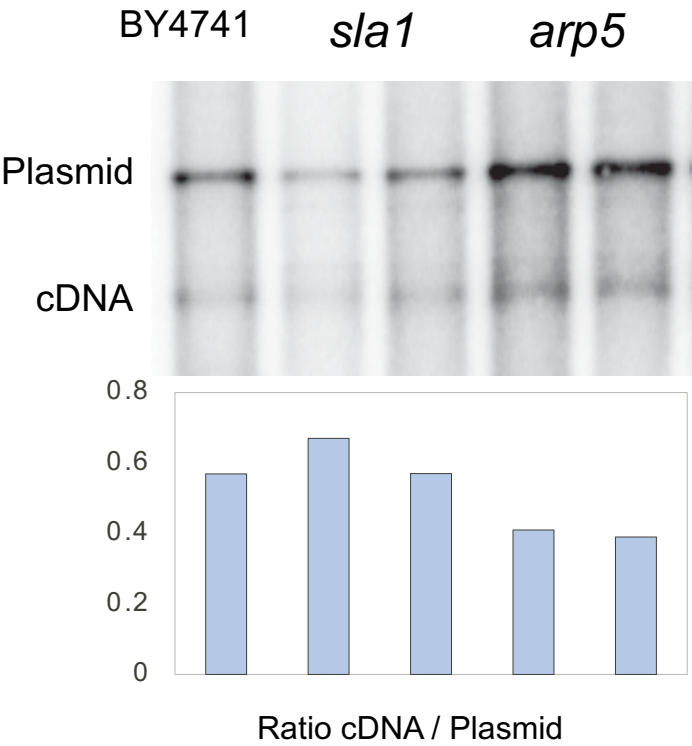

Stress / Chaperone / Modification

Western

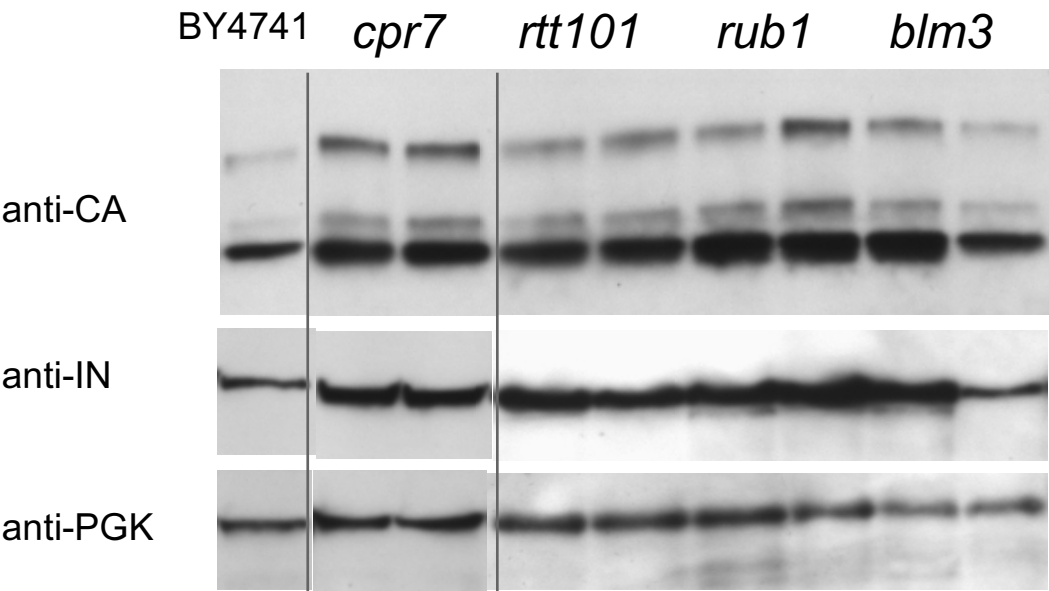

Southern

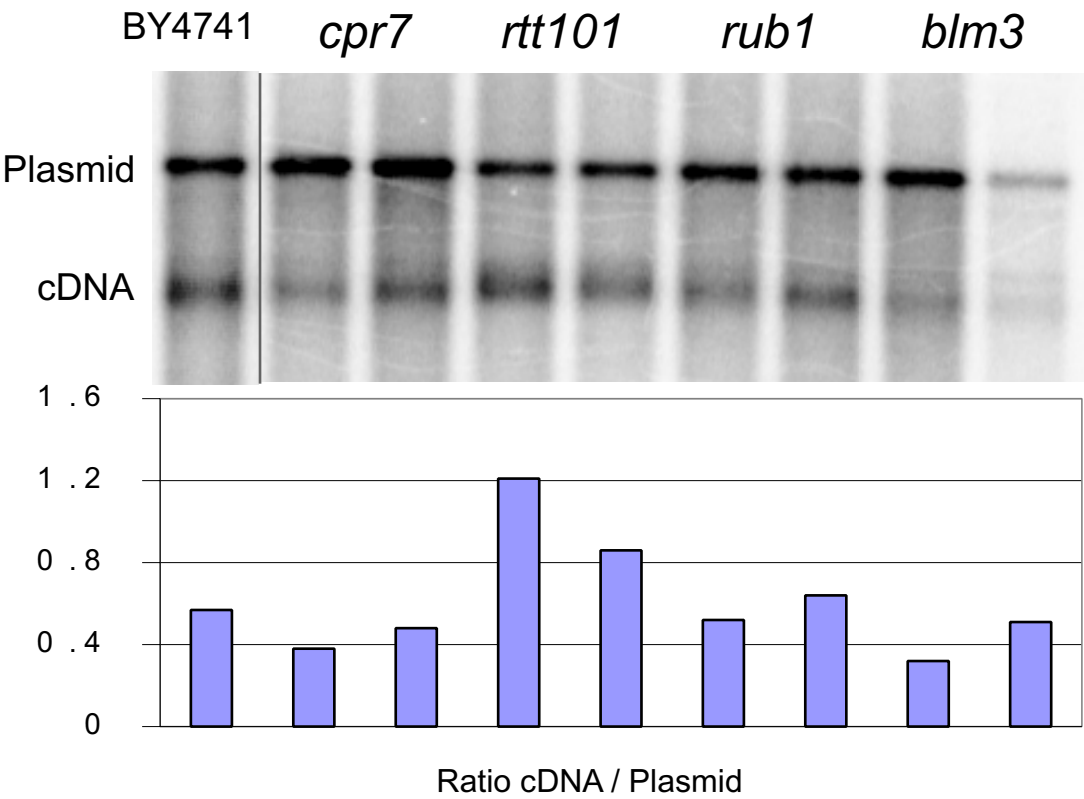

# Unknowns

## Western

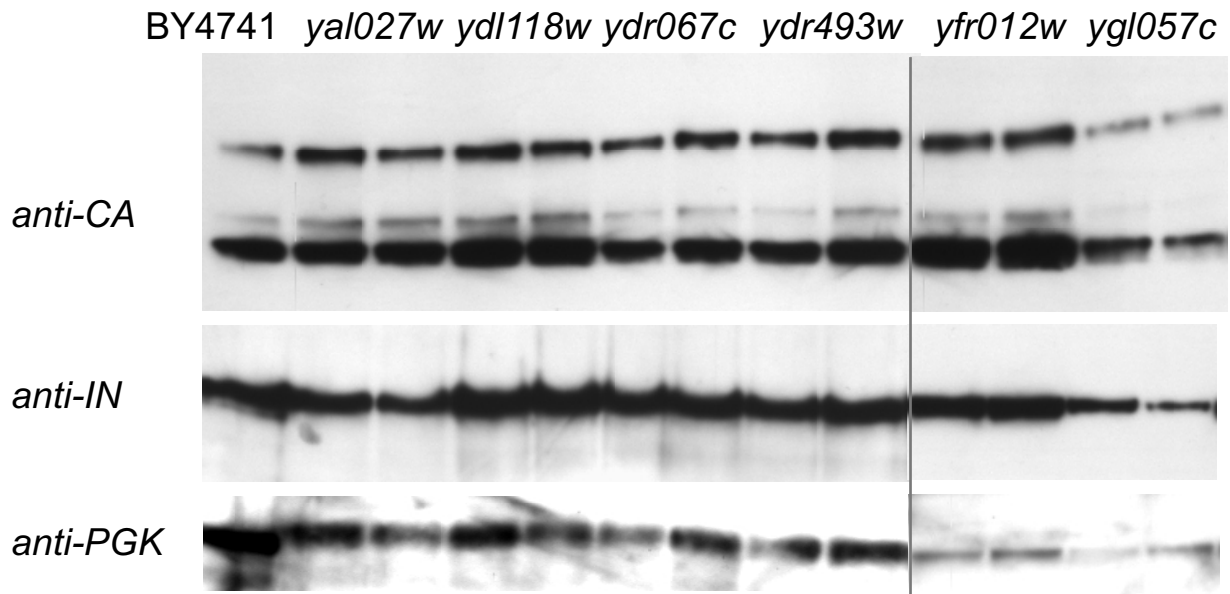

## Southern

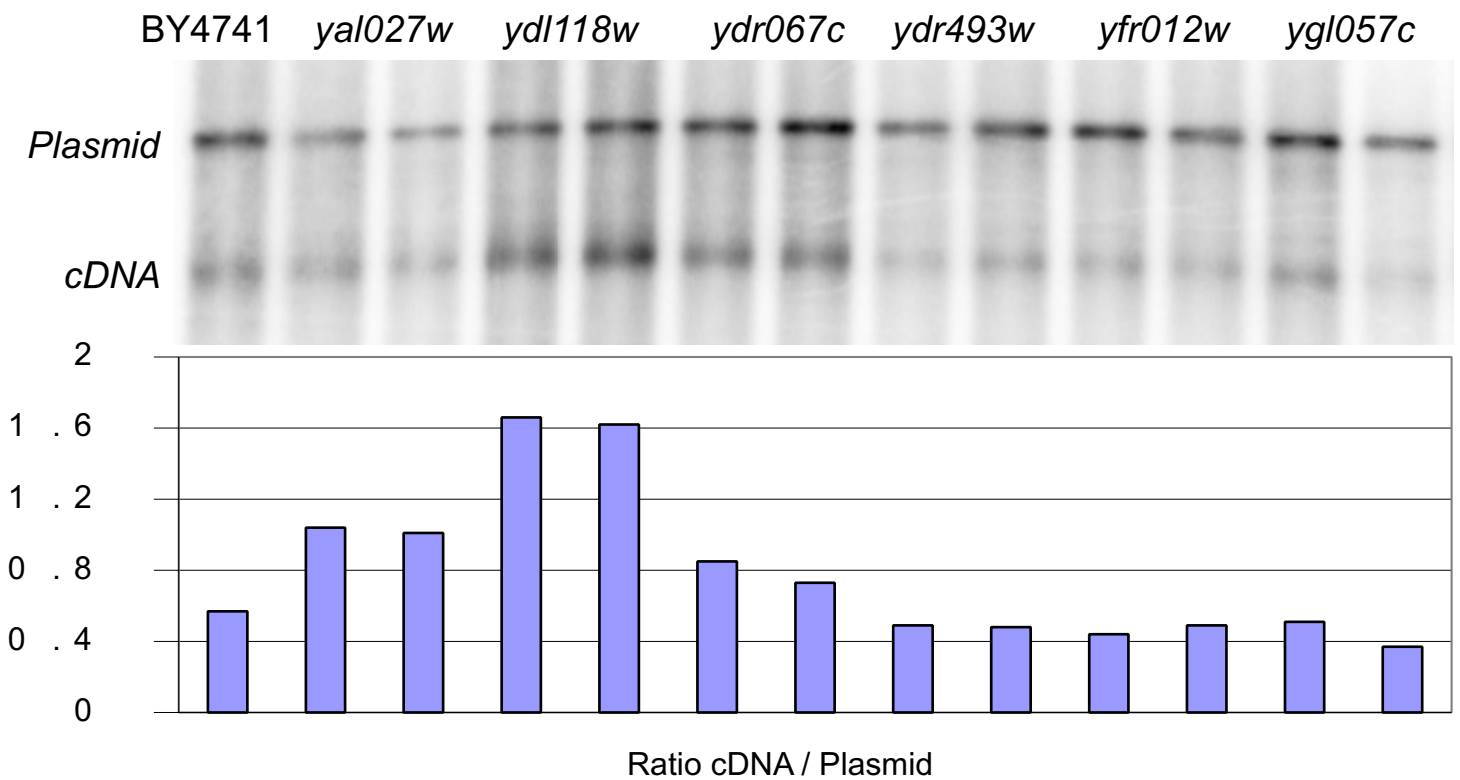

# Unknowns

## Western

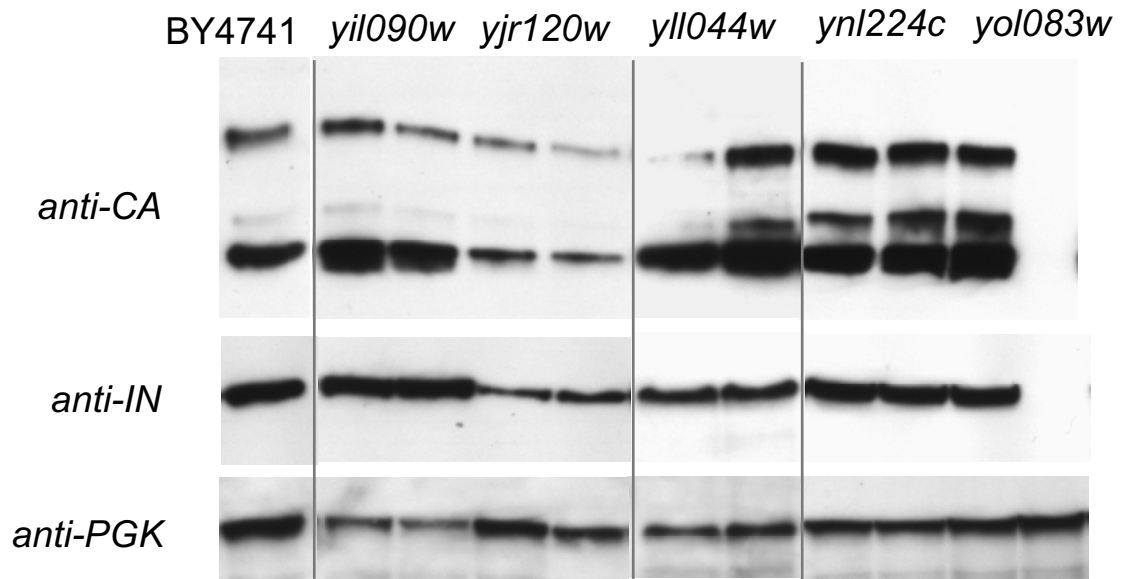

## Southern

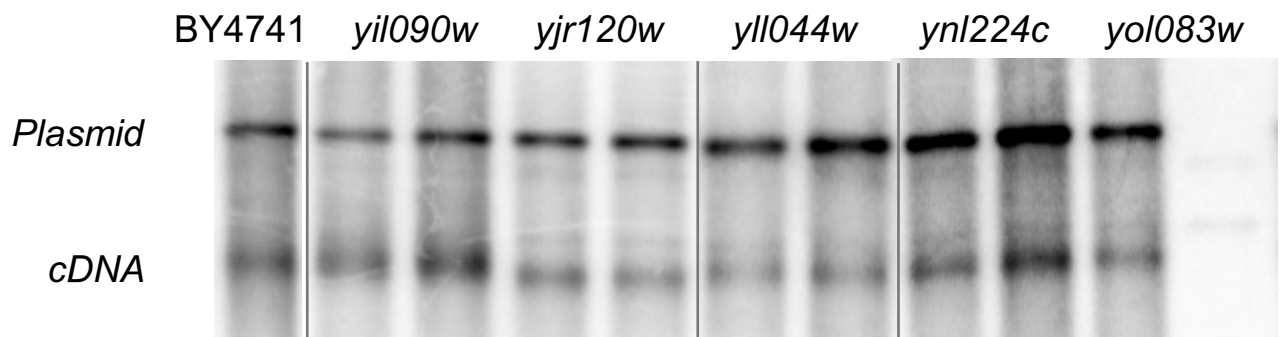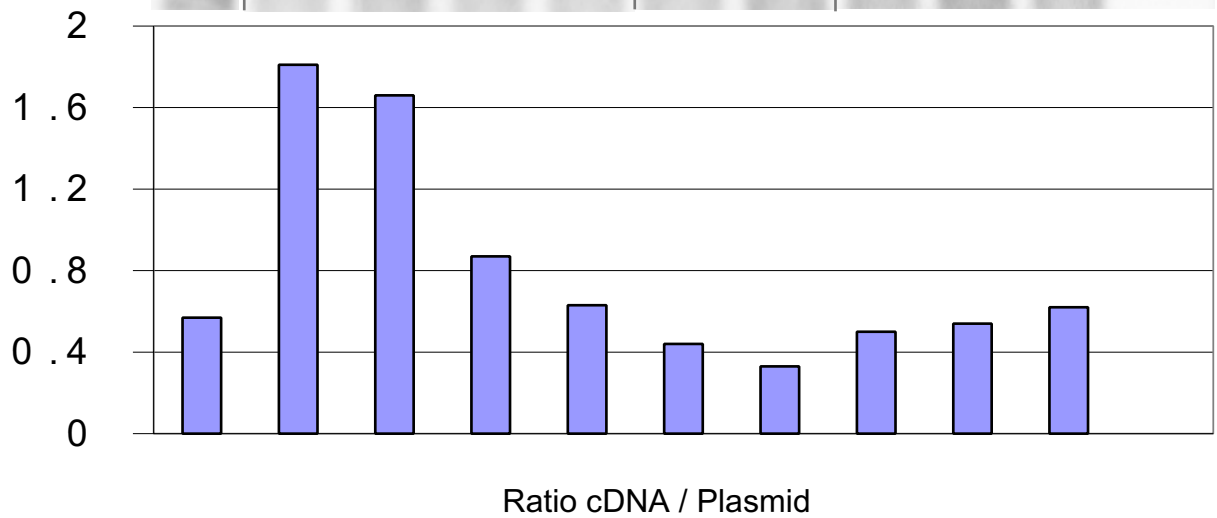

Sup. Table 1. Mutants that were not assayed because of poor growth

| Collection ID | ORF       | Gene Name     | Description <sup>1</sup>                                                                                            |
|---------------|-----------|---------------|---------------------------------------------------------------------------------------------------------------------|
| 398           | YAL010C   | <i>MDM10</i>  | YAL010C Mitochondrial outer membrane protein involved in mitochondrial morphology and inheritance                   |
| 6866          | YAL016W   | <i>TPD3</i>   | YAL016W protein phosphatase 2A regulatory subunit A                                                                 |
| 3026          | YBL002W   | <i>HTB2</i>   | YBL002W Histone H2B (HTB1 and HTB2 code for nearly identical proteins)                                              |
| 3038          | YBL012C   | 0             | questionable ORF, Dubious                                                                                           |
| 3047          | YBL021C   | <i>HAP3</i>   | transcriptional activator protein of CYC1                                                                           |
| 3048          | YBL022C   | <i>PIM1</i>   | YBL022C mitochondrial ATP-dependent protease                                                                        |
| 3051          | YBL025W   | <i>RRV10</i>  | Upstream activation factor subunit                                                                                  |
| 3059          | YBL033C   | <i>RIB1</i>   | YBL033C GTP cyclohydrolase II                                                                                       |
| 3064          | YBL038W   | <i>MRPL16</i> | Mitochondrial ribosomal protein MRPL16                                                                              |
| 3070          | YBL044W   | 0             | hypothetical protein, uncharacterized                                                                               |
| 3071          | YBL045C   | <i>COR1</i>   | YBL045C 44 kDa core protein of yeast coenzyme QH2 cytochrome c reductase                                            |
| 3078          | YBL052C   | <i>SAS3</i>   | SAS3 for Something about silencing, gene 3. Influences silencing at HMR.                                            |
| 3106          | YBL080C   | <i>PET112</i> | YBL080C 62-kDa protein                                                                                              |
| 3125          | YBL099W   | <i>ATP1</i>   | mitochondrial F1F0-ATPase alpha subunit                                                                             |
| 3126          | YBL100C   | 0             | questionable ORF, dubious                                                                                           |
| 3138          | YBR003W   | <i>COQ1</i>   | hexaprenyl pyrophosphate synthetase                                                                                 |
| 3155          | YBR018C   | <i>GAL7</i>   | galactose-1-phosphate uridylyl transferase                                                                          |
| 3156          | YBR019C   | <i>GAL10</i>  | YBR019C UDP-glucose 4-epimerase                                                                                     |
| 3163          | YBR026C   | <i>MRF1'</i>  | YBR026C Nuclear protein that binds to T-rich strand of core consensus sequence of autonomously replicating sequence |
| 3172          | YBR035C   | <i>PDX3</i>   | YBR035C pyridoxine (pyridoxamine) phosphate oxidase                                                                 |
| 3174          | YBR037C   | <i>SCO1</i>   | inner mitochondrial membrane protein                                                                                |
| 3206          | YBR069C   | <i>VAP1</i>   | Probable amino acid transport protein                                                                               |
| 3236          | YBR097W   | <i>VPS15</i>  | Myristoylated Serine/threonine protein kinase involved in vacuolar protein sorting                                  |
| 7161          | YBR112C   | <i>CYC8</i>   | YBR112C Transcription regulatory protein                                                                            |
| 3261          | YBR122C   | <i>MRPL36</i> | YBR122C Mitochondrial ribosomal protein MRPL36 (YmL36)                                                              |
| 3271          | YBR132C   | <i>AGP2</i>   | YBR132C Amino acid permease                                                                                         |
| 3303          | YBR163W   | <i>DEM1</i>   | weak similarity of pre-rRNA processing protein                                                                      |
| 3324          | YBR184W   | 0             | ORF, uncharacterized                                                                                                |
| 3366          | YBR226C   | 0             | ORF, dubious                                                                                                        |
| 3386          | YBR246W   | 0             | ORF, uncharacterized                                                                                                |
| 3388          | YBR248C   | <i>HIS7</i>   | glutamine amidotransferase:cyclase                                                                                  |
| 3391          | YBR251W   | <i>MRP55</i>  | YBR251W Probable mitochondrial ribosomal protein S5                                                                 |
| 3399          | YBR259W   | 0             | ORF, uncharacterized                                                                                                |
| 3407          | YBR267W   | 0             | ORF, uncharacterized                                                                                                |
| 3408          | YBR268W   | <i>MRPL37</i> | Probable mitochondrial protein L37                                                                                  |
| 5730          | YBR282W   | <i>MRPL27</i> | Mitochondrial ribosomal protein MRPL27 (YmL27)                                                                      |
| 3410          | YCL002C   | 0             | ORF, uncharacterized                                                                                                |
| 3415          | YCL007C   | <i>CWH36</i>  | YCL007C Calcofluor White Hypersensitivity                                                                           |
| 3437          | YCL030C   | <i>HIS4</i>   | YCL030C histidinol dehydrogenase                                                                                    |
| 3483          | YCR003W   | <i>MRPL32</i> | Mitochondrial ribosomal protein MRPL32 (YmL32)                                                                      |
| 3484          | YCR004C   | <i>YCP4</i>   | YCR004C FMN-binding protein                                                                                         |
| 5752          | YCR024C   | 0             | ORF, uncharacterized                                                                                                |
| 7179          | YCR028C-A | <i>RIM1</i>   | Single-stranded DNA-binding protein that is essential for mitochondrial genome maintenance                          |
| 7183          | YCR046C   | <i>IMG1</i>   | YCR046C required for respiration and maintenance of mitochondrial genome                                            |
| 7184          | YCR047C   | <i>BUD23</i>  | bud site selection                                                                                                  |
| 7198          | YCR084C   | <i>TUP1</i>   | YCR084C glucose repression regulatory protein, exhibits similarity to beta subunits of G proteins                   |
| 3698          | YDL002C   | <i>NHP10</i>  | YDL002C HMG1-box containing protein                                                                                 |
| 3728          | YDL032W   | 0             | ORF, dubious                                                                                                        |
| 3729          | YDL033C   | 0             | ORF, uncharacterized                                                                                                |
| 3736          | YDL040C   | <i>NAT1</i>   | YDL040C N-terminal acetyltransferase                                                                                |
| 3740          | YDL044C   | <i>MTF2</i>   | Necessary for the stability and/or processing of some large mitochondrial transcripts                               |
| 3742          | YDL045W-A | <i>MRP10</i>  | Mitochondrial ribosomal protein of the small subunit                                                                |
| 3744          | YDL047W   | <i>SIT4</i>   | SIT4 suppress mutations in DBF2                                                                                     |
| 3746          | YDL049C   | <i>KNH1</i>   | YDL049C KRE9 homolog                                                                                                |
| 3754          | YDL057W   | 0             | ORF, uncharacterized                                                                                                |
| 3759          | YDL062W   | 0             | ORF, dubious                                                                                                        |
| 3764          | YDL067C   | <i>COX9</i>   | Subunit VIIa of cytochrome c oxidase                                                                                |
| 3765          | YDL068W   | 0             | ORF, dubious                                                                                                        |
| 3766          | YDL069C   | <i>CBS1</i>   | translational activator of cytochrome b                                                                             |
| 3801          | YDL104C   | <i>ORF7</i>   | YDL104C similarity to H.influenzae sialoglycoprotease (gcp)                                                         |
| 3804          | YDL107W   | <i>MSS2</i>   | YDL107W cox1 pre-mRNA splicing factor                                                                               |
| 3810          | YDL113C   | <i>ATG20</i>  | Protein required for the transport of aminopeptidase I (Lap4p) through the cytoplasm-to-vacuole targeting pathway   |
| 3844          | YDL146W   | 0             | ORF, uncharacterized                                                                                                |
| 3865          | YDL167C   | <i>NRP1</i>   | YDL167C Asparagine-rich protein                                                                                     |

|      |           |               |                                                                                                                                                                                                   |
|------|-----------|---------------|---------------------------------------------------------------------------------------------------------------------------------------------------------------------------------------------------|
| 3879 | YDL181W   | <i>INH1</i>   | YDL181W ATPase inhibitor                                                                                                                                                                          |
| 3900 | YDL202W   | <i>MRPL11</i> | Mitochondrial ribosomal protein MRPL11 (YmL11)                                                                                                                                                    |
| 3929 | YDL232W   | <i>OST4</i>   | YDL232W 3.6-kDa protein, probably membrane-located                                                                                                                                                |
| 3949 | YDR009W   | <i>GAL3</i>   | YDR009W galactokinase                                                                                                                                                                             |
| 3956 | YDR017C   | <i>KCS1</i>   | YDR017C Shows homology to basic leucine zipper family of transcription factors                                                                                                                    |
| 3966 | YDR027C   | <i>VP554</i>  | Loss Upsets Vacuole; Golgi to vacuole transport; in Garp complex, Golgi apparatus                                                                                                                 |
| 3967 | YDR028C   | <i>REG1</i>   | YDR028C regulatory subunit for protein phosphatase Glc7p                                                                                                                                          |
| 3978 | YDR042C   | 0             | ORF, uncharacterized                                                                                                                                                                              |
| 3993 | YDR057W   | <i>YOS9</i>   | Appears to play a direct role in the transport of GPI-anchored proteins to the Golgi apparatus. ER to Golgi transport, in the ER                                                                  |
| 4000 | YDR065W   | 0             | ORF, uncharacterized                                                                                                                                                                              |
| 4013 | YDR078C   | <i>SHL2</i>   | Suppressor of HydroxyUrea sensitivity                                                                                                                                                             |
| 4014 | YDR079W   | <i>PET100</i> | YDR079W cytochrome c oxidase-specific assembly factor                                                                                                                                             |
| 4048 | YDR114C   | 0             | ORF, dubious                                                                                                                                                                                      |
| 4049 | YDR115W   | 0             | mitochondrial large ribosomal subunit                                                                                                                                                             |
| 3516 | YDR158W   | <i>HOM2</i>   | aspartic beta semi-aldehyde dehydrogenase                                                                                                                                                         |
| 3553 | YDR194C   | <i>MSS116</i> | YDR194C Mitochondrial RNA helicase of the DEAD box family                                                                                                                                         |
| 3556 | YDR197W   | <i>CBS2</i>   | cytochrome b translational activator                                                                                                                                                              |
| 3563 | YDR204W   | <i>COQ4</i>   | YDR204W Involved in ubiquinone biosynthesis                                                                                                                                                       |
| 3585 | YDR226W   | <i>ADK1</i>   | YDR226W cytosolic adenylate kinase                                                                                                                                                                |
| 3590 | YDR231C   | <i>COX20</i>  | Mitochondrial inner membrane protein, required for proteolytic processing of Cox2p and its assembly into cytochrome c oxidase                                                                     |
| 3596 | YDR237W   | <i>MRPL7</i>  | YDR237W Mitochondrial ribosomal protein MRPL7 (YmL7)                                                                                                                                              |
| 3627 | YDR268W   | <i>MSW1</i>   | mitochondrial tryptophanyl-tRNA synthetase                                                                                                                                                        |
| 3655 | YDR296W   | <i>MHR1</i>   | Mitochondrial Homologous DNA Recombination                                                                                                                                                        |
| 3659 | YDR300C   | <i>PRO1</i>   | YDR300C gamma-glutamyl kinase                                                                                                                                                                     |
| 3681 | YDR322W   | <i>MRPL35</i> | YDR322W Mitochondrial ribosomal protein MRPL35 (YmL35)                                                                                                                                            |
| 4184 | YDR347W   | <i>MRP1</i>   | 37 kDa mitochondrial ribosomal protein                                                                                                                                                            |
| 4187 | YDR350C   | <i>TCM10</i>  | YDR350C protein of unknown function                                                                                                                                                               |
| 4201 | YDR364C   | <i>CDC40</i>  | Member of the beta transducin family                                                                                                                                                              |
| 4211 | YDR375C   | <i>BCS1</i>   | Mitochondrial protein of the CDC48/PAS1 /SEC18 ATPase family, required for expression of functional Rieske iron-sulfur protein                                                                    |
| 4236 | YDR400W   | <i>URH1</i>   | Uridine Ribosyltransferase, pyrimidine salvage                                                                                                                                                    |
| 4241 | YDR405W   | <i>MRP20</i>  | YDR405W 263-amino acid mitochondrial ribosomal large subunit protein; similar to L23 family of ribosomal proteins                                                                                 |
| 4304 | YDR470C   | <i>UGO1</i>   | outer membrane protein required for for mitochondrial fusion                                                                                                                                      |
| 4318 | YDR484W   | <i>SAC2</i>   | YDR484W May interact with actin as a component or controller of the assembly or stability of the actin cytoskeleton                                                                               |
| 4341 | YDR507C   | <i>GIN4</i>   | YDR507C putative serine/threonine kinase                                                                                                                                                          |
| 4343 | YDR509W   | 0             | ORF, dubious                                                                                                                                                                                      |
| 4346 | YDR512C   | <i>EMI1</i>   | Early Meiotic Induction                                                                                                                                                                           |
| 4352 | YDR518W   | <i>EUG1</i>   | Protein disulfide isomerase homolog                                                                                                                                                               |
| 4355 | YDR521W   | 0             | ORF, dubious                                                                                                                                                                                      |
| 4357 | YDR523C   | <i>SPS1</i>   | YDR523C serine/threonine kinase homologous to Ste20p; expressed in middle/late meiosis                                                                                                            |
| 4363 | YDR529C   | <i>OCR7</i>   | YDR529C ubiquinol-cytochrome c oxidoreductase subunit 7 (14 kDa)                                                                                                                                  |
| 4366 | YDR532C   | 0             | ORF, uncharacterized                                                                                                                                                                              |
| 265  | YEL024W   | <i>RIP1</i>   | YEL024W Rieske iron-sulfur protein of the mitochondrial cytochrome bc1 complex                                                                                                                    |
| 268  | YEL027W   | <i>CLP5</i>   | YEL027W Vacuolar ATP synthase 17-kDa proteolipid C subunit of VO sector; dicyclohexylcarbodiimide binding subunit                                                                                 |
| 277  | YEL036C   | <i>ANP1</i>   | Mannan 8; Protein of the endoplasmic reticulum with a role in retention of glycosyltransferases in the Golgi, also involved in osmotic sensitivity and resistance to aminonitrophenyl propanediol |
| 286  | YEL045C   | 0             | ORF, dubious                                                                                                                                                                                      |
| 287  | YEL046C   | <i>GLY1</i>   | YEL046C Threonine Aldolase                                                                                                                                                                        |
| 291  | YEL050C   | <i>RML2</i>   | YEL050C Mitochondrial ribosomal protein L2 of the large subunit                                                                                                                                   |
| 292  | YEL051W   | <i>VMA8</i>   | YEL051W Vacuolar H-ATPase D subunit of the V1 catalytic sector                                                                                                                                    |
| 145  | YER014C-A | <i>BUD25</i>  | bud site selection                                                                                                                                                                                |
| 148  | YER017C   | <i>AFG3</i>   | YER017C ATP-dependent metalloprotease                                                                                                                                                             |
| 173  | YER040W   | <i>GLN3</i>   | positive nitrogen regulatory protein                                                                                                                                                              |
| 177  | YER044C   | <i>ERG28</i>  | Endoplasmic reticulum membrane protein, may facilitate protein-protein interactions between the Erg28p dehydrogenase and the Erg27p 3-ketoreductase and/or tether these enzymes to the ER         |
| 185  | YER050C   | <i>RSM18</i>  | Ribosomal Small subunit in Mitochondria                                                                                                                                                           |
| 190  | YER055C   | <i>HIS1</i>   | YER055C ATP phosphoribosyltransferase                                                                                                                                                             |
| 194  | YER058W   | <i>PET117</i> | cytochrome c oxidase assembly factor                                                                                                                                                              |
| 198  | YER061C   | <i>CEM1</i>   | Protein homologous to beta-keto-acyl synthase                                                                                                                                                     |
| 207  | YER068W   | <i>MOT2</i>   | YER068W putative zinc finger protein                                                                                                                                                              |
| 210  | YER070W   | <i>RNR1</i>   | YER070W ribonucleotide reductase                                                                                                                                                                  |
| 6101 | YER103W   | <i>SSA4</i>   | YER103W member of 70 kDa heat shock protein family                                                                                                                                                |
| 6108 | YER110C   | <i>KAP123</i> | YER110C Karyopherin beta 4                                                                                                                                                                        |
| 6121 | YER122C   | <i>GL03</i>   | YER122C Zinc-finger-containing protein with similarity to Gcs1p and Sps18p                                                                                                                        |
| 6139 | YER141W   | <i>COX15</i>  | cytochrome oxidase assembly factor                                                                                                                                                                |
| 6150 | YER153C   | <i>PET122</i> | YER153C translational activator of cytochrome c oxidase subunit III                                                                                                                               |
| 6151 | YER154W   | <i>OXA1</i>   | YER154W Required for correct assembly of the cytochrome c oxidase and the ATP synthase complex                                                                                                    |
| 6165 | YER169W   | <i>RPH1</i>   | Repressor of PHR1 transcription; binds to PHR1 URS                                                                                                                                                |
| 7280 | YFL016C   | <i>MDJ1</i>   | YFL016C DnaJ homolog involved in mitochondrial biogenesis and protein folding                                                                                                                     |

|      |           |               |                                                                                                                                                                             |
|------|-----------|---------------|-----------------------------------------------------------------------------------------------------------------------------------------------------------------------------|
| 5657 | YFL036W   | <i>RPO41</i>  | YFL036W mitochondrial RNA polymerase II                                                                                                                                     |
| 7082 | YFR025C   | <i>HIS2</i>   | YFR025C Hisidinolphosphatase                                                                                                                                                |
| 4406 | YGL038C   | <i>OCH1</i>   | YGL038C membrane-bound mannosyltransferase                                                                                                                                  |
| 4431 | YGL064C   | <i>MRH4</i>   | mitochondrial DEAD box RNA helicase                                                                                                                                         |
| 4437 | YGL070C   | <i>RPB9</i>   | YGL070C RNA polymerase II subunit                                                                                                                                           |
| 4438 | YGL071W   | <i>RCS1</i>   | YGL071W Putative transcription factor that binds the consensus site PyPuCACCPCPu                                                                                            |
| 4443 | YGL076C   | <i>RPL7A</i>  | Ribosomal protein L7A (L6A) (rp11) (YL8)                                                                                                                                    |
| 4462 | YGL095C   | <i>VPS45</i>  | YGL095C cytosolic and peripheral membrane protein                                                                                                                           |
| 4474 | YGL107C   | <i>RMD9</i>   | Required for Meiotic nuclear Division                                                                                                                                       |
| 4496 | YGL129C   | <i>RSM23</i>  | Ribosomal Small subunit in Mitochondria                                                                                                                                     |
| 4498 | YGL131C   | <i>SNY2</i>   | Name reserved, Daniel Schaft                                                                                                                                                |
| 4502 | YGL135W   | <i>RPL18</i>  | Ribosomal Protein of the Large subunit                                                                                                                                      |
| 4510 | YGL143C   | <i>MRF1</i>   | Mitochondrial polypeptide chain release factor                                                                                                                              |
| 4515 | YGL148W   | <i>ARO2</i>   | YGL148W Chorismate synthase                                                                                                                                                 |
| 4572 | YGL206C   | <i>CHC1</i>   | YGL206C presumed vesicle coat protein                                                                                                                                       |
| 6884 | YGL218W   | <i>SRF1</i>   | Stress Resistance during Fermentation, name reserved                                                                                                                        |
| 4586 | YGL220W   | 0             | ORF, uncharacterized                                                                                                                                                        |
| 4589 | YGL223C   | <i>COG1</i>   | Conserved Oligomeric Golgi complex; intra-Golgi transport; retrograde (vesicle recycling within Golgi) transport                                                            |
| 4604 | YGL237C   | <i>HAP2</i>   | transcriptional activator protein of CYC1                                                                                                                                   |
| 4607 | YGL240W   | <i>DOC1</i>   | Doc1p and Cdc26p are associated with the anaphase-promoting complex and are involved in the degradation of Clb2p                                                            |
| 4613 | YGL246C   | <i>RAI1</i>   | processing of 27S pre-rRNA, in nucleus                                                                                                                                      |
| 4636 | YGR006W   | <i>PRP18</i>  | YGR006W RNA splicing factor associated with U5 snRNP                                                                                                                        |
| 4650 | YGR020C   | <i>VMA7</i>   | Vacuolar H-ATPase 14 kDa subunit (subunit F) of the catalytic (V1) sector                                                                                                   |
| 4666 | YGR036C   | <i>CWH8</i>   | YGR036C Cwh8p contains 3 short stretches of amino acids that are characteristic for a wide variety of phosphatases, including lipid phosphatases and a protein phosphatase. |
| 4692 | YGR062C   | <i>COX18</i>  | YGR062C Cytochrome OXidase gene 18                                                                                                                                          |
| 4706 | YGR076C   | <i>MRPL25</i> | Mitochondrial ribosomal protein MRPL25 (YmL25)                                                                                                                              |
| 4715 | YGR085C   | <i>RPL11B</i> | YGR085C 60S ribosomal protein L11B (L16B) (rp39B) (YL22)                                                                                                                    |
| 4731 | YGR101W   | <i>PCP1</i>   | processing of cytochrome c peroxidase                                                                                                                                       |
| 4732 | YGR102C   | 0             | ORF, uncharacterized                                                                                                                                                        |
| 4742 | YGR112W   | <i>SHY1</i>   | YGR112W mitochondrial protein with homology to the mammalian SURF-1 gene                                                                                                    |
| 4765 | YGR135W   | <i>PRE9</i>   | YGR135W proteasome component Y13                                                                                                                                            |
| 4780 | YGR150C   | 0             | ORF, uncharacterized                                                                                                                                                        |
| 6696 | YGR155W   | <i>CYS4</i>   | YGR155W Cystathionine beta-synthase                                                                                                                                         |
| 4795 | YGR165W   | <i>MRPS35</i> | Mitochondrial Ribosomal Protein, Small subunit                                                                                                                              |
| 4804 | YGR174C   | <i>CBP4</i>   | YGR174C Essential for the expression and activity of ubiquinol-cytochrome c reductase                                                                                       |
| 4810 | YGR180C   | <i>RNR4</i>   | YGR180C Ribonucleotide Reductase                                                                                                                                            |
| 4813 | YGR183C   | <i>QC9</i>    | YGR183C 7.3 kDa subunit 9 of the ubiquinol cytochrome c oxidoreductase complex                                                                                              |
| 6591 | YGR204W   | <i>ADE3</i>   | encodes the cytoplasmic trifunctional enzyme C1-tetrahydrofolate synthase                                                                                                   |
| 4845 | YGR215W   | <i>RSM27</i>  | Mitochondrial Ribosomal Protein, Small subunit                                                                                                                              |
| 5872 | YGR219W   | 0             | ORF, dubious                                                                                                                                                                |
| 5873 | YGR220C   | <i>MRPL9</i>  | YGR220C Mitochondrial ribosomal protein MRPL9 (YmL9) (E. coli L3) (human MRL3)                                                                                              |
| 5875 | YGR222W   | <i>PET54</i>  | YGR222W translational activator of cytochrome c oxidase subunit III                                                                                                         |
| 7287 | YGR255C   | <i>COQ6</i>   | YGR255C COQ6 monooxygenase                                                                                                                                                  |
| 7288 | YGR257C   | <i>MTM1</i>   | Manganese Trafficking factor for Mitochondrial SOD2                                                                                                                         |
| 5914 | YGR262C   | <i>BUD32</i>  | bud site selection                                                                                                                                                          |
| 5937 | YGR285C   | <i>ZUO1</i>   | YGR285C Zuo1n, putative Z-DNA binding protein                                                                                                                               |
| 946  | YHL017W   | 0             | ORF, uncharacterized                                                                                                                                                        |
| 925  | YHL038C   | <i>CBP2</i>   | YHL038C Cytochrome B pre-mRNA processing protein                                                                                                                            |
| 6608 | YHR025W   | <i>THR1</i>   | YHR025W homoserine kinase                                                                                                                                                   |
| 6609 | YHR026W   | <i>PPA1</i>   | proteolipid protein of the proton ATPase                                                                                                                                    |
| 5948 | YHR039C-B |               | ORF, merged                                                                                                                                                                 |
| 1879 | YHR051W   | <i>COX6</i>   | subunit VI of cytochrome c oxidase                                                                                                                                          |
| 1888 | YHR060W   | <i>VMA22</i>  | YHR060W required for V-ATPase activity                                                                                                                                      |
| 6414 | YHR064C   | <i>PDR13</i>  | YHR064C Hsp70 Protein                                                                                                                                                       |
| 6615 | YHR067W   | <i>RMD12</i>  | Required for Meiotic nuclear Division                                                                                                                                       |
| 1919 | YHR091C   | <i>MSR1</i>   | YHR091C Arginyl-tRNA synthetase                                                                                                                                             |
| 1928 | YHR100C   | 0             | ORF, uncharacterized                                                                                                                                                        |
| 1932 | YHR104W   | <i>GRE3</i>   | YHR104W Aldo-keto reductase                                                                                                                                                 |
| 1944 | YHR116W   | 0             | ORF, uncharacterized                                                                                                                                                        |
| 1948 | YHR120W   | <i>MSH1</i>   | mutS homolog involved in mitochondrial DNA repair                                                                                                                           |
| 1952 | YHR124W   | <i>NDT80</i>  | YHR124W meiosis-specific gene, mRNA is sporulation-specific                                                                                                                 |
| 2841 | YHR147C   | <i>MRPL6</i>  | YHR147C Mitochondrial ribosomal protein MRPL6 (YmL6)                                                                                                                        |
| 2851 | YHR157W   | <i>REC104</i> | mRNA is induced early in meiosis                                                                                                                                            |
| 6417 | YHR168W   | 0             | ORF, uncharacterized                                                                                                                                                        |
| 2872 | YHR178W   | <i>STB5</i>   | YHR178W Zinc finger (6-Cys)                                                                                                                                                 |
| 2877 | YHR183W   | <i>GND1</i>   | YHR183W Phosphogluconate Dehydrogenase (Decarboxylating)                                                                                                                    |

|      |           |                       |                                                                                                                                                       |
|------|-----------|-----------------------|-------------------------------------------------------------------------------------------------------------------------------------------------------|
| 6634 | YHR185C   | <i>PFS1</i>           | Prospore Formation at Selected spindle poles                                                                                                          |
| 1413 | YIL020C   | <i>HIS6</i>           | phosphoribosyl-5-amino-1-phosphoribosyl-4-imidazolecarboxamide isomerase                                                                              |
| 2275 | YIL116W   | <i>HIS5</i>           | histidinol-phosphate aminotransferase                                                                                                                 |
| 1377 | YJL046W   | 0                     | ORF, uncharacterized                                                                                                                                  |
| 1371 | YJL052W   | <i>TDH1</i>           | Y.JL052W Glyceraldehyde-3-phosphate dehydrogenase 1                                                                                                   |
| 1367 | YJL056C   | <i>ZAP1</i>           | Y.JL056C Metalloregulatory protein involved in zinc-responsive transcriptional regulation                                                             |
| 1328 | YJL095W   | <i>BCK1</i>           | Y.JL095W putative 163 kDa protein kinase                                                                                                              |
| 1327 | YJL096W   | <i>MRPL49</i>         | Mitochondrial Ribosomal Protein, Large subunit                                                                                                        |
| 7097 | YJL101C   | <i>GSH1</i>           | gamma-glutamylcysteine synthetase                                                                                                                     |
| 1321 | YJL102W   | <i>MEF2</i>           | mitochondrial elongation factor G-like protein                                                                                                        |
| 1304 | YJL120W   | 0                     | ORF, dubious                                                                                                                                          |
| 1305 | YJL121C   | <i>RPE1</i>           | D-ribulose-5-Phosphate 3-epimerase                                                                                                                    |
| 1295 | YJL130C   | <i>URA2</i>           | Y.JL130C carbamoyl-phosphate synthetase, aspartate transcarbamylase, and glutamine amidotransferase                                                   |
| 7002 | YJL136C   | <i>RPS21B</i>         | Ribosomal protein S21B (S26B) (YS25)                                                                                                                  |
| 1285 | YJL140W   | <i>RPB4</i>           | Y.JL140W fourth-largest subunit of RNA polymerase II                                                                                                  |
| 1245 | YJL180C   | <i>ATP12</i>          | Y.JL180C essential for assembly of a functional F1-ATPase                                                                                             |
| 1237 | YJL188C   | <i>BUD19</i>          | bud site selection                                                                                                                                    |
| 1236 | YJL189W   | <i>RPL39</i>          | Ribosomal protein L39 (L46) (YL40)                                                                                                                    |
| 7018 | YJL189W   | <i>RPL39</i>          | Ribosomal protein L39 (L46) (YL40)                                                                                                                    |
| 2551 | YJR073C   | <i>OPI3</i>           | Y.JR073C Methylene-fatty-acyl-phospholipid synthase (unsaturated phospholipid N-methyltransferase)                                                    |
| 6902 | YJR090C   | <i>GRR1</i>           | F box protein with several leucine rich repeats                                                                                                       |
| 2583 | YJR105W   | <i>ADO1</i>           | adenosine kinase                                                                                                                                      |
| 6918 | YJR113C   | <i>RSM7</i>           | mitochondrial ribosome small subunit                                                                                                                  |
| 6921 | YJR118C   | <i>ILM1</i>           | weak similarity to Helicobacter pylori UreD protein                                                                                                   |
| 6925 | YJR122W   | <i>CAF17</i>          | Y.JR122W CCR4 associated factor                                                                                                                       |
| 6937 | YJR144W   | <i>MGM101</i>         | mitochondrial genome maintenance                                                                                                                      |
| 4850 | YKL002W   | <i>DID4</i><br>(VPS2) | class E vacuolar-protein sorting and endocytosis factor; late endosome to vacuole transport                                                           |
| 4851 | YKL003C   | <i>MRP17</i>          | Mitochondrial ribosomal protein MRP17                                                                                                                 |
| 4865 | YKL016C   | <i>ATP7</i>           | YKL016C ATP synthase d subunit                                                                                                                        |
| 4881 | YKL032C   | <i>DKR1</i>           | intrastrand crosslink recognition protein                                                                                                             |
| 4984 | YKL134C   | <i>OCT1</i>           | iron ion homeostasis; in mitochondrion                                                                                                                |
| 4990 | YKL140W   | <i>TGL1</i>           | triglyceride lipase-cholesterol esterase                                                                                                              |
| 4993 | YKL143W   | <i>LTV1</i>           | YKL143W low temperature viability protein                                                                                                             |
| 5005 | YKL155C   | <i>RSM22</i>          | mitochondrial small ribosomal subunit                                                                                                                 |
| 5009 | YKL159C   | <i>RCN1</i>           | calcium-dependent protein serine/threonine phosphatase; in calcineurin complex                                                                        |
| 5010 | YKL160W   | <i>ELF1</i>           | name reserved by Fred Winston                                                                                                                         |
| 5019 | YKL169C   | 0                     | ORF, dubious                                                                                                                                          |
| 5020 | YKL170W   | <i>MRPL38</i>         | mitochondrial ribosomal protein L14                                                                                                                   |
| 5034 | YKL184W   | <i>SPE1</i>           | YKL184W Ornithine decarboxylase                                                                                                                       |
| 5062 | YKL212W   | <i>SAC1</i>           | YKL212W integral membrane protein localizing to the ER and Golgi                                                                                      |
| 5066 | YKL216W   | <i>URA1</i>           | YKL216W dihydroorotate dehydrogenase                                                                                                                  |
| 5070 | YKL221W   | <i>MCH2</i>           | monocarboxylate permease homologue                                                                                                                    |
| 5077 | YKR006C   | <i>MRPL13</i>         | Mitochondrial ribosomal protein YmL13                                                                                                                 |
| 7102 | YKR085C   | <i>MRPL20</i>         | 22.3 kDa mitochondrial ribosomal large subunit protein YmL20; homologous to L17 of E. coli                                                            |
| 6006 | YKR090W   | <i>PXL1</i>           | name reserved by Scott Erdman                                                                                                                         |
| 1494 | YLL006W   | <i>MMM1</i>           | mitochondrial outer membrane protein                                                                                                                  |
| 6022 | YLL018C-A | <i>COX19</i>          | Protein required for cytochrome c oxidase assembly, located in the cytosol and mitochondrial intermembrane space                                      |
| 1515 | YLL027W   | <i>ISA1</i>           | iron ion transport, in mitochondrial matrix                                                                                                           |
| 1582 | YLR027C   | <i>AAT2</i>           | aspartate aminotransferase, cytosolic                                                                                                                 |
| 6436 | YLR038C   | <i>COX12</i>          | subunit VIb of cytochrome c oxidase                                                                                                                   |
| 2667 | YLR056W   | <i>ERG3</i>           | YLR056W C-5 sterol desaturase                                                                                                                         |
| 2678 | YLR067C   | <i>PET309</i>         | YLR067C Involved in expression of mitochondrial COX1 by regulating translation of COX1 mRNA and by affecting transcription or stability of COX1 mRNAs |
| 2685 | YLR074C   | <i>BUD20</i>          | bud site selection                                                                                                                                    |
| 2698 | YLR087C   | <i>CSF1</i>           | Protein required for fermentation at low temperature                                                                                                  |
| 2700 | YLR089C   | 0                     | alanine degradation and biosynthesis                                                                                                                  |
| 2725 | YLR114C   | 0                     | ORF, uncharacterized                                                                                                                                  |
| 4096 | YLR139C   | <i>SLS1</i>           | YLR139C 73 kDa mitochondrial integral membrane protein                                                                                                |
| 4105 | YLR148W   | <i>PEP3</i>           | YLR148W vacuolar membrane protein                                                                                                                     |
| 4150 | YLR201C   | 0                     | ORF, uncharacterized                                                                                                                                  |
| 4151 | YLR202C   | 0                     | ORF, dubious                                                                                                                                          |
| 4152 | YLR203C   | <i>MSSS1</i>          | YLR203C Protein involved in maturation of COX1 and COB mRNA                                                                                           |
| 4167 | YLR218C   | 0                     | ORF, uncharacterized                                                                                                                                  |
| 5149 | YLR240W   | <i>VPS34</i>          | YLR240W phosphatidylinositol 3-kinase                                                                                                                 |
| 5153 | YLR244C   | <i>MAP1</i>           | YLR244C methionine aminopeptidase                                                                                                                     |
| 5179 | YLR270W   | <i>DCS1</i>           | deadenylation-dependent decapping; hydrolase in the HIT superfamily                                                                                   |
| 5198 | YLR288C   | <i>MEC3</i>           | involved in checkpoint control and DNA repair                                                                                                         |

|      |           |               |                                                                                                                                                                            |
|------|-----------|---------------|----------------------------------------------------------------------------------------------------------------------------------------------------------------------------|
| 5221 | YLR312W-A | <i>MRPL15</i> | Mitochondrial Ribosomal Protein, Large subunit                                                                                                                             |
| 5233 | YLR324W   | 0             | ORF, uncharacterized                                                                                                                                                       |
| 5278 | YLR369W   | <i>SSO1</i>   | Hsp70 family protein; DNA dependent DNA replication                                                                                                                        |
| 5282 | YLR373C   | <i>VID22</i>  | vacuole import and degradation, integral to plasma membrane                                                                                                                |
| 6715 | YLR382C   | <i>NAM2</i>   | mitochondrial leucyl tRNA synthetase                                                                                                                                       |
| 5305 | YLR396C   | <i>VPS33</i>  | YLR396C Vacuolar sorting protein essential for vacuolar morphogenesis and function                                                                                         |
| 5312 | YLR403W   | <i>SFP1</i>   | YLR403W split zinc finger protein                                                                                                                                          |
| 7109 | YLR439W   | <i>MRPL4</i>  | Mitochondrial 60S ribosomal protein L4                                                                                                                                     |
| 561  | YML013C-A | YML012C-A     | ORF, dubious                                                                                                                                                               |
| 6719 | YML022W   | <i>APT1</i>   | Adenine phosphoribosyltransferase                                                                                                                                          |
| 482  | YML088W   | <i>UFO1</i>   | ubiquitin-protein ligase activity, F-box protein; response to DNA damage stimulus                                                                                          |
| 6506 | YML106W   | <i>URAS</i>   | YML106W Orotate phosphoribosyltransferase 1                                                                                                                                |
| 6510 | YML110C   | <i>DBI56</i>  | YML110C DBF2 Interacting Protein                                                                                                                                           |
| 6512 | YML112W   | <i>CTK3</i>   | YML112W CTD kinase-I gamma subunit                                                                                                                                         |
| 6532 | YML131W   | 0             | ORF, uncharacterized                                                                                                                                                       |
| 599  | YMR024W   | <i>MRPL3</i>  | Mitochondrial ribosomal protein MRPL3 (YmlL3)                                                                                                                              |
| 611  | YMR035W   | <i>IMP2</i>   | YMR035W Inner membrane protease (mitochondrial protein)                                                                                                                    |
| 618  | YMR042W   | <i>ARG80</i>  | YMR042W Regulator of arginine-responsive genes with ARG81 and ARG82                                                                                                        |
| 6188 | YMR054W   | <i>STV1</i>   | YMR054W vacuolar proton pumping ATPase, 110-kDa subunit; not in vacuole membrane                                                                                           |
| 6197 | YMR064W   | <i>AEP1</i>   | basic, hydrophilic protein of 59 kDa                                                                                                                                       |
| 6199 | YMR066W   | <i>SOV1</i>   | Synthesis Of Var, name reserved Marie Sanclirico                                                                                                                           |
| 6204 | YMR071C   | <i>TVPI8</i>  | Tlg2-Vesicle Protein, integral membrane protein                                                                                                                            |
| 6205 | YMR072W   | <i>ABF2</i>   | YMR072W HMG-1 homolog, mitochondrial                                                                                                                                       |
| 6217 | YMR083W   | <i>ADH3</i>   | alcohol dehydrogenase isoenzyme III                                                                                                                                        |
| 6218 | YMR084W   | 0             | ORF, uncharacterized                                                                                                                                                       |
| 6224 | YMR089C   | <i>YTA12</i>  | YMR089C mitochondrial membrane ATPase of the CDC48/PAS1VSEC18 (AAA) family                                                                                                 |
| 6538 | YMR098C   | 0             | ORF, uncharacterized                                                                                                                                                       |
| 722  | YMR141C   | 0             | ORF, dubious                                                                                                                                                               |
| 732  | YMR150C   | <i>IMP1</i>   | YMR150C inner membrane protease (mitochondrial protein)                                                                                                                    |
| 731  | YMR151W   | <i>YIM2</i>   | YMR151W hypothetical protein                                                                                                                                               |
| 6444 | YMR158W   | <i>MRPS8</i>  | Mitochondrial Ribosomal Protein, Small subunit                                                                                                                             |
| 814  | YMR228W   | <i>MTF1</i>   | YMR228W Mitochondrial RNA polymerase specificity factor                                                                                                                    |
| 842  | YMR256C   | <i>COX7</i>   | subunit VII of cytochrome c oxidase                                                                                                                                        |
| 843  | YMR257C   | <i>PET111</i> | YMR257C translational activator of cytochrome c oxidase subunit II                                                                                                         |
| 853  | YMR267W   | <i>PPA2</i>   | YMR267W mitochondrial inorganic pyrophosphatase                                                                                                                            |
| 869  | YMR283C   | <i>RTI1</i>   | YMR283C Initiator methionine tRNA 2'-O-ribosyl phosphate transferase                                                                                                       |
| 872  | YMR286W   | <i>MRPL33</i> | Mitochondrial ribosomal protein MRPL33 (YmlL33) (E. coli L30)                                                                                                              |
| 873  | YMR287C   | <i>MSU1</i>   | YMR287C Protein essential for mitochondrial biogenesis                                                                                                                     |
| 880  | YMR293C   | 0             | amidase activity, in mitochondrion                                                                                                                                         |
| 5333 | YNL005C   | <i>MRP7</i>   | YNL005C Mitochondrial ribosomal protein MRP7 (YmlL2) (E. coli L27)                                                                                                         |
| 7210 | YNL052W   | <i>COX5A</i>  | YNL052W Cytochrome-c oxidase chain Va                                                                                                                                      |
| 7220 | YNL073W   | <i>MSK1</i>   | mitochondrial lysine-tRNA synthetase                                                                                                                                       |
| 2995 | YNL081C   | <i>SW52</i>   | Sick Without Securin; name reserved Oma Cohen-Fix                                                                                                                          |
| 2052 | YNL160W   | <i>YGP1</i>   | YNL160W YGP1 encodes gp37, a glycoprotein synthesized in response to nutrient limitation which is homologous to the sporulation-specific SPS100 gene                       |
| 2035 | YNL177C   | <i>MRPL22</i> | Mitochondrial Ribosomal Protein, Large subunit                                                                                                                             |
| 1999 | YNL213C   | 0             | mitochondrion organization and biogenesis                                                                                                                                  |
| 1987 | YNL225C   | <i>CNM67</i>  | YNL225C chaotic nuclear migration; predicted mass is 67kDa                                                                                                                 |
| 6465 | YNL252C   | <i>MRPL17</i> | Mitochondrial Ribosomal Protein, Large subunit                                                                                                                             |
| 7386 | YNL284C   | <i>MRPL10</i> | YNL284C Mitochondrial ribosomal protein MRPL10 (YmlL10)                                                                                                                    |
| 1140 | YNL304W   | <i>YPT11</i>  | acts positively on mitochondrial distribution toward the bud; mitochondrion inheritance                                                                                    |
| 7387 | YNL315C   | <i>ATP11</i>  | essential for assembly of a functional F1-ATPase                                                                                                                           |
| 5411 | YNR036C   | 0             | strong similarity to ribosomal protein S12                                                                                                                                 |
| 5412 | YNR037C   | 0             | ORF, uncharacterized                                                                                                                                                       |
| 5416 | YNR041C   | <i>COQ2</i>   | para hydroxybenzoate: polyprenyl transferase                                                                                                                               |
| 5420 | YNR045W   | <i>PET494</i> | YNR045W translational activator of cytochrome c oxidase                                                                                                                    |
| 1697 | YOL006C   | <i>TOP1</i>   | YOL006C topoisomerase I                                                                                                                                                    |
| 1700 | YOL009C   | <i>MDM12</i>  | YOL009C Mdm12p is a mitochondrial outer membrane protein. An Mdm12p homolog exists in S. Pombe which confers a dominant negative phenotype when expressed in S. cerevisiae |
| 1703 | YOL012C   | <i>HTA3</i>   | An evolutionarily conserved member of the histone H2A FVZ family of histone variants                                                                                       |
| 1714 | YOL023W   | <i>IFM1</i>   | YOL023W mitochondrial initiation factor 2                                                                                                                                  |
| 1740 | YOL049W   | <i>GSH2</i>   | YOL049W Glutathione Synthetase                                                                                                                                             |
| 1764 | YOL072W   | <i>THP1</i>   | RNA-nucleus export; in nuclear envelope-ER network, nuclear pore                                                                                                           |
| 1771 | YOL080C   | <i>REX4</i>   | RNA Exonuclease; member of 3'->5' exonuclease family; ribosome assembly                                                                                                    |
| 1772 | YOL081W   | <i>IRA2</i>   | YOL081W encodes a GTPase activating protein, highly homologous to Ira1p, homologue of neurofibromin                                                                        |
| 6246 | YOL096C   | <i>COQ3</i>   | YOL096C 3,4-dihydroxy-5-hexaprenylbenzoate methyltransferase                                                                                                               |
| 6250 | YOL100W   | <i>PKO2</i>   | MAPKKK cascade; in nucleus                                                                                                                                                 |
| 6288 | YOL138C   | 0             | ORF, uncharacterized                                                                                                                                                       |

|      |         |               |                                                                                                                                                                                                       |
|------|---------|---------------|-------------------------------------------------------------------------------------------------------------------------------------------------------------------------------------------------------|
| 6652 | YOL143C | <i>RIB4</i>   | YOL143C 6,7-dimethyl-8-ribityllumazine synthase (DMRL synthase)                                                                                                                                       |
| 7390 | YOL148C | <i>SPT20</i>  | YOL148C transcription factor, member of the histone acetyltransferase SAGA complex                                                                                                                    |
| 6659 | YOL150C | 0             | ORF, dubious                                                                                                                                                                                          |
| 1811 | YOR035C | <i>SHE4</i>   | Required for mother cell-specific HO expression                                                                                                                                                       |
| 1812 | YOR036W | <i>PEP12</i>  | YOR036W integral membrane protein[; c-terminal TMD]; located in endosome                                                                                                                              |
| 1829 | YOR053W | 0             | ORF, dubious                                                                                                                                                                                          |
| 1831 | YOR055W | 0             | ORF, dubious                                                                                                                                                                                          |
| 1856 | YOR080W | <i>DIA2</i>   | Digs Into Agar, invasive growth                                                                                                                                                                       |
| 1868 | YOR092W | <i>ECM3</i>   | YOR092W ExtraCellular Mutant                                                                                                                                                                          |
| 2381 | YOR125C | <i>CAT5</i>   | YOR125C may encode a protein involved in one or more monooxygenase or hydroxylase steps of ubiquinone biosynthesis                                                                                    |
| 2406 | YOR150W | <i>MRPL23</i> | ribosomal protein of the large subunit, mitochondrial                                                                                                                                                 |
| 2414 | YOR158W | <i>PET123</i> | YOR158W Mitochondrial ribosomal protein of small subunit                                                                                                                                              |
| 2440 | YOR184W | <i>SER1</i>   | YOR184W phosphoserine transaminase                                                                                                                                                                    |
| 2441 | YOR185C | <i>GSP2</i>   | YOR185C GTP binding protein, almost identical to Gsp1p                                                                                                                                                |
| 2455 | YOR199W | 0             | ORF, dubious                                                                                                                                                                                          |
| 2456 | YOR200W | 0             | ORF, dubious                                                                                                                                                                                          |
| 2457 | YOR201C | <i>PET56</i>  | YOR201C Ribose methyltransferase for mitochondrial 21S rRNA                                                                                                                                           |
| 2461 | YOR205C | <i>FMP38</i>  | Found in Mitochondrial Proteome, name reserved by Reter Rehling                                                                                                                                       |
| 2467 | YOR211C | <i>MGM1</i>   | YOR211C encodes protein with GTP-binding domain related to dynamin                                                                                                                                    |
| 2477 | YOR221C | <i>MCT1</i>   | malonyl-CoA:ACP transferase; in mitochondrion                                                                                                                                                         |
| 2485 | YOR229W | <i>WTM2</i>   | YOR229W Transcriptional modulator                                                                                                                                                                     |
| 2497 | YOR241W | <i>MET7</i>   | tetrahydrotyl/polyglutamate synthase                                                                                                                                                                  |
| 1586 | YOR290C | <i>SNF2</i>   | YOR290C transcriptional regulator                                                                                                                                                                     |
| 1602 | YOR305W | 0             | ORF, uncharacterized                                                                                                                                                                                  |
| 1627 | YOR330C | <i>MIP1</i>   | YOR330C catalytic subunit of mitochondrial DNA polymerase                                                                                                                                             |
| 1631 | YOR334W | <i>MRS2</i>   | YOR334W splicing factor                                                                                                                                                                               |
| 1634 | YOR337W | <i>TEA1</i>   | YOR337W Mutants are defective in Ty1 Enhancer-mediated Activation                                                                                                                                     |
| 1647 | YOR350C | <i>MNE1</i>   | weak similarity to Esp1p and mitochondrial L.illustris cytochrome oxidase I                                                                                                                           |
| 1655 | YOR358W | <i>HAP5</i>   | Component, along with Hap2p and Hap3p, of CCAAT-binding transcription factor                                                                                                                          |
| 1672 | YOR375C | <i>GDIH1</i>  | YOR375C NADP-specific glutamate dehydrogenase                                                                                                                                                         |
| 2823 | YPL005W | 0             | ORF, uncharacterized                                                                                                                                                                                  |
| 2815 | YPL013C | <i>MRPS16</i> | ribosomal protein S16, mitochondrial                                                                                                                                                                  |
| 7339 | YPL017C | 0             | Putative S-adenosylmethionine-dependent methyltransferase of the seven beta-strand family                                                                                                             |
| 2799 | YPL029W | <i>SUV3</i>   | YPL029W putative ATP-dependent helicase                                                                                                                                                               |
| 2769 | YPL059W | <i>GRX5</i>   | Member of glutaredoxin subfamily together w/GRX3, GRX4. Significant sequence diff. from other glutaredoxin subfamily, GRX1 & GRX2. Part of mt machinery involved in synthesis/assembly of iron/sulfur |
| 7343 | YPL078C | <i>ATP4</i>   | YPL078C F(1)F(0)-ATPase complex delta subunit, mitochondrial                                                                                                                                          |
| 2749 | YPL079W | <i>RPL21B</i> | YPL079W Ribosomal protein L21B                                                                                                                                                                        |
| 2157 | YPL095C | 0             | ORF, uncharacterized                                                                                                                                                                                  |
| 2155 | YPL097W | <i>MSY1</i>   | YPL097W Tyrosyl-tRNA synthetase                                                                                                                                                                       |
| 2148 | YPL104W | <i>MSD1</i>   | Aspartyl-tRNA synthetase, mitochondrial                                                                                                                                                               |
| 2134 | YPL118W | <i>MRP51</i>  | YPL118W Component of small subunit of the mitochondrial ribosome                                                                                                                                      |
| 6479 | YPL132W | <i>COX11</i>  | YPL132W Putative heme A biosynthetic enzyme involved in forming the formyl group at position 8 of the porphyrin ring                                                                                  |
| 7344 | YPL137C | 0             | ORF, uncharacterized                                                                                                                                                                                  |
| 2080 | YPL172C | <i>COX10</i>  | YPL172C Putative farnesyl transferase required for heme A synthesis                                                                                                                                   |
| 2079 | YPL173W | <i>MRPL40</i> | YPL173W Mitochondrial ribosomal protein MRPL40 (YmL40)                                                                                                                                                |
| 1104 | YPL188W | <i>POSS</i>   | YPL188W similarity to Utr1p and YEL041w                                                                                                                                                               |
| 1098 | YPL194W | <i>DOC1</i>   | YPL194W DNA damage checkpoint gene                                                                                                                                                                    |
| 1058 | YPL234C | <i>TFP3</i>   | YPL234C 17-kDa subunit C of vacuolar membrane H(+)-ATPase                                                                                                                                             |
| 1044 | YPL248C | <i>GAL4</i>   | zinc-finger transcription factor of the Zn(2)-Cys(6) binuclear cluster domain type                                                                                                                    |
| 1038 | YPL254W | <i>HFI1</i>   | YPL254W transcription factor, member of Adai/Gcn5 protein complex                                                                                                                                     |
| 7135 | YPL268W | <i>PLC1</i>   | phosphoinositide-specific phospholipase C                                                                                                                                                             |
| 1022 | YPL270W | <i>MDL2</i>   | YPL270W ATP-binding cassette (ABC) transporter family member                                                                                                                                          |
| 1021 | YPL271W | <i>ATP15</i>  | YPL271W nuclear gene for ATP synthase epsilon subunit                                                                                                                                                 |
| 7144 | YPR024W | <i>YME1</i>   | YPR024W Mitochondrial protein of the CDC48/(PAS1)/SEC18 family of ATPases                                                                                                                             |
| 5449 | YPR030W | <i>CSR2</i>   | Nuclear protein with a potential regulatory role in utilization of galactose and nonfermentable carbon sources; in nucleus                                                                            |
| 7151 | YPR067W | <i>ISA2</i>   | iron ion transport, in mitochondrial intermembrane space                                                                                                                                              |
| 5491 | YPR072W | <i>NOT5</i>   | Subunit of the CCR4-NOT complex, which is a global transcriptional regulator with roles in transcription                                                                                              |
| 5516 | YPR099C | 0             | ORF, dubious                                                                                                                                                                                          |
| 5517 | YPR100W | <i>MRPL51</i> | Mitochondrial Ribosomal Protein, Large subunit                                                                                                                                                        |
| 5532 | YPR116W | 0             | ORF, uncharacterized                                                                                                                                                                                  |
| 5606 | YPR191W | <i>OCR2</i>   | YPR191W 40 kDa ubiquinol cytochrome-c reductase core protein 2                                                                                                                                        |
| 5613 | YPR198W | <i>SGE1</i>   | multi-copy suppressor of gal11 null; member of drug-resistance protein family                                                                                                                         |

<sup>1</sup>Description from SGD

**Sup. Table 2A. Mutants affected in high-copy Ty3-*HIS3* transposition**

| ORF     | Gene Name   | Description <sup>1</sup>                                                                                                                                                                                                     | High copy tpn | Low tpn | Other Ty screens <sup>2</sup> |
|---------|-------------|------------------------------------------------------------------------------------------------------------------------------------------------------------------------------------------------------------------------------|---------------|---------|-------------------------------|
| YAL013W | <i>DEP1</i> | Transcriptional modulator involved in the regulation of structural genes involved in phospholipid biosynthesis, also participates in regulation of metabolically unrelated genes as well as maintenance of mating efficiency | 2             | 2       | SD                            |
| YAL021C | <i>CCR4</i> | carbon catabolite repression; transcriptional regulator for some glucose-repressed genes including ADH2; 95 kDa containng leucine rich tandem repeats                                                                        | 5             | 3       |                               |
| YAL023C | <i>PMT2</i> | Transfers mannosyl residues from dolichyl phosphate-D-mannose to seryl and threonyl residues in proteins; acts in complex with Pmt1p; dolichyl phosphate-D-mannose:protein O-D-mannosyltransferase                           | 4             | 3       |                               |
| YAL027W | <i>0</i>    | 0                                                                                                                                                                                                                            | 2             | 2       |                               |
| YAL029C | <i>MYO4</i> | Required for mother-specific HO expression, for the bud tip localization of ASH1 and IST2 mRNA; facilitates growth and orientation of ER tubules along with She3p; myosin                                                    | 4             | 2       |                               |
| YAR003W | <i>SWD1</i> | Subunit of the COMPASS complex, which methylates histone H3 on lysine 4 and is required in transcriptional silencing near telomeres                                                                                          | 4             | 4       | MA                            |
| YAR030C | <i>0</i>    | 0                                                                                                                                                                                                                            | 4             | 2       |                               |
| YAR043C | <i>0</i>    | 0                                                                                                                                                                                                                            | 4             | 2       |                               |
| YBL006C | <i>LDB7</i> | Protein of unknown function; null mutant shows a reduced affinity for the alcian blue dye suggesting a decreased net negative charge of the cell surface                                                                     | 5             | 5       |                               |
| YBL007C | <i>SLA1</i> | Protein involved in assembly of the cortical actin cytoskeleton, contains 3 SH3 domains, interacts with Bee1p                                                                                                                | 1             | 1       |                               |

|         |              |                                                                                                                                                                                                              |   |   |    |
|---------|--------------|--------------------------------------------------------------------------------------------------------------------------------------------------------------------------------------------------------------|---|---|----|
| YBL024W | <i>NCL1</i>  | Nuclear protein 1, similar to NOP2 and human proliferation associated nucleolar protein p120; Probable proliferating-cell nucleolar antigen (human p120)                                                     | 5 | 2 | MA |
| YBL094C | 0            | 0                                                                                                                                                                                                            | 4 | 4 |    |
| YBL103C | <i>RTG3</i>  | Basic helix-loop-helix-leucine zipper (bHLH/Zip) transcription factor that forms a complex with another bHLH/Zip protein, Rtg1p, to activate the retrograde (RTG) and TOR pathways                           | 5 | 3 |    |
| YBR021W | <i>FUR4</i>  | Uracil permease, localized to the plasma membrane; expression is tightly regulated by uracil levels and environmental cues                                                                                   | 1 | 1 |    |
| YBR044C | <i>TCM62</i> | mitochondrial protein; (putative) chaperone                                                                                                                                                                  | 2 | 2 |    |
| YBR062C | 0            | 0                                                                                                                                                                                                            | 4 | 2 |    |
| YBR077C | 0            | 0                                                                                                                                                                                                            | 5 | 2 | SD |
| YBR105C | <i>VID24</i> | also involved in vacuolar protein targeting; peripheral vesicle membrane protein                                                                                                                             | 5 | 2 |    |
| YBR114W | <i>RAD16</i> | Protein that recognizes and binds damaged DNA in an ATP-dependent manner (with Rad7p) during nucleotide excision repair; subunit of Nucleotide Excision Repair Factor 4 (NEF4); member of the SWI/SNF family | 2 | 3 |    |
| YBR182C | <i>SMP1</i>  | Transcription factor of the MADS (Mcm1p, Agamous, Deficiens, SRF) box family; closely related to RLM1; Probable DNA-binding transcription factor, Homolog to SRF/SL-2                                        | 5 | 3 |    |
| YBR269C | <i>FMP21</i> | The authentic, non-tagged protein was localized to the mitochondria                                                                                                                                          | 4 | 4 |    |
| YBR277C | 0            | 0                                                                                                                                                                                                            | 4 | 4 |    |

|           |              |                                                                                                                                                                                                                            |  |   |   |    |
|-----------|--------------|----------------------------------------------------------------------------------------------------------------------------------------------------------------------------------------------------------------------------|--|---|---|----|
| YBR281C   | 0            | 0                                                                                                                                                                                                                          |  | 4 | 3 |    |
| YBR284W   | 0            | 0                                                                                                                                                                                                                          |  | 4 | 4 | MA |
| YBR297W   | <i>MAL33</i> | MAL-activator protein, part of complex locus MAL3; nonfunctional in genomic reference strain S288C                                                                                                                         |  | 4 | 3 |    |
| YBR298C   | <i>MAL31</i> | Maltose permease, high-affinity maltose transporter (alpha-glucoside transporter); encoded in the MAL3 complex locus; member of the 12 transmembrane domain superfamily of sugar transporters; functional in               |  | 4 | 3 |    |
| YCL037C   | <i>SRO9</i>  | Associates with translating ribosomes; may function in the cytoplasm to modulate mRNA translation; may be involved in organization of actin filaments; RNA binding protein with La motif                                   |  | 5 | 4 |    |
| YCL061C   | <i>MRC1</i>  | S-phase checkpoint protein found at replication forks, required for DNA replication; also required for Rad53p activation during DNA replication stress, where it forms a replication-pausing complex with Tof1p and is     |  | 4 | 4 |    |
| YCR020W-B | <i>HTL1</i>  | High-Temperature Lethal; high-temperature lethal                                                                                                                                                                           |  | 4 | 4 |    |
| YCR045C   | 0            | 0                                                                                                                                                                                                                          |  | 4 | 3 |    |
| YCR050C   | 0            | 0                                                                                                                                                                                                                          |  | 4 | 3 |    |
| YDL013W   | <i>HEX3</i>  | Ring finger protein involved in the DNA damage response with possible recombination role; genetically identified by synthetic lethality with SGS1 (DNA helicase) and TOP3 (DNA topoisomerase); sporulation role; interacts |  | 4 | 3 |    |
| YDL021W   | <i>GPM2</i>  | Similar to GPM1 (phosphoglycerate mutase); converts 3-phosphoglycerate to 2-phosphoglycerate in glycolysis; phosphoglycerate mutase, involved in glycolysis                                                                |  | 4 | 3 |    |
| YDL056W   | <i>MBP1</i>  | transcription factor                                                                                                                                                                                                       |  | 4 | 4 |    |

|         |              |                                                                                                                                                                                                                                           |   |   |    |
|---------|--------------|-------------------------------------------------------------------------------------------------------------------------------------------------------------------------------------------------------------------------------------------|---|---|----|
| YDL074C | <i>BRE1</i>  | E3 ubiquitin ligase for Rad6p, required for the ubiquitination of histone H2B, recruitment of Rad6p to promoter chromatin and subsequent methylation of histone H3 (on L4 and L79), contains RING finger domain                           | 4 | 4 |    |
| YDL088C | <i>ASM4</i>  | Nuclear pore complex subunit, part of a subcomplex also containing Nup53p, Nup170p, and Pse1p                                                                                                                                             | 1 | 1 |    |
| YDL116W | <i>NUP84</i> | Subunit of the nuclear pore complex (NPC), forms a subcomplex with Nup85p, Nup120p, Nup145p-C, Sec13p, and Seh1p that plays a role in nuclear mRNA export and NPC biogenesis                                                              | 4 | 4 | SD |
| YDL118W | 0            | 0                                                                                                                                                                                                                                         | 1 | 2 |    |
| YDL135C | <i>RDI1</i>  | Rho GDP dissociation inhibitor with activity toward Rho1p; Rho GDP dissociation inhibitor                                                                                                                                                 | 4 | 3 |    |
| YDL151C | <i>BUD30</i> | Dubious open reading frame, unlikely to encode a protein; not conserved in closely related <i>Saccharomyces</i> species; 96% of ORF overlaps the verified gene <i>RPC53</i> ; diploid mutant displays a weak budding pattern phenotype in | 1 | 4 | SD |
| YDL160C | <i>DHH1</i>  | Cytoplasmic DExD/H-box helicase, stimulates mRNA decapping, coordinates distinct steps in mRNA function and decay, interacts with both the decapping and deadenylase complexes, may have a role in mRNA                                   | 2 | 2 |    |
| YDL162C | 0            | 0                                                                                                                                                                                                                                         | 5 | 3 |    |
| YDR049W | 0            | 0                                                                                                                                                                                                                                         | 4 | 3 |    |
| YDR067C | 0            | 0                                                                                                                                                                                                                                         | 2 | 2 |    |
| YDR074W | <i>TPS2</i>  | Trehalose-6-phosphate phosphatase                                                                                                                                                                                                         | 4 | 4 | SD |
| YDR139C | <i>RUB1</i>  | Related to ubiquitin (53% identical). Homolog of mammalian ubiquitin-like protein NEDD8. Matures by proteolytic removal of C-terminal asparagine (ASN) residue. Requires the proteins ULA1 & UBA3 for activation; ubiquitin-              | 2 | 2 |    |

|         |               |                                                                                                                                                                                                                                  |   |   |    |
|---------|---------------|----------------------------------------------------------------------------------------------------------------------------------------------------------------------------------------------------------------------------------|---|---|----|
| YDR159W | <i>SAC3</i>   | A component of the nuclear pore that is involved in the nuclear export of both mRNA and protein; Leucine permease transcriptional regulator                                                                                      | 5 | 5 |    |
| YDR176W | <i>NGG1</i>   | Involved in glucose repression of GAL4p-regulated transcription; transcription factor; genetic and mutant analyses suggest that Ngg1p (Ada3p) is part of two transcriptional adaptor/HAT (histone acetyltransferase              | 4 | 4 |    |
| YDR255C | <i>RMD5</i>   | Cytosolic protein required for sporulation; also required for the ubiquitination of the gluconeogenetic enzyme fructose-1,6-bisphosphatase, which is degraded rapidly after the switch from gluconeogenesis to glycolysis        | 4 | 1 |    |
| YDR272W | <i>GLO2</i>   | Cytoplasmic glyoxalase II, catalyzes the hydrolysis of S-D-lactoylglutathione into glutathione and D-lactate                                                                                                                     | 4 | 2 |    |
| YDR289C | <i>RTT103</i> | Regulator of Ty1 Transposition; regulator of Ty1 Transposition                                                                                                                                                                   | 5 | 5 | JC |
| YDR290W | <i>0</i>      | Sick Without Securin; HU sensitive mutant; name reserved Orna Cohen-Fix                                                                                                                                                          | 5 | 5 |    |
| YDR293C | <i>SSD1</i>   | Protein with a role in maintenance of cellular integrity, interacts with components of the TOR pathway; <i>ssd1</i> mutant of a clinical <i>S. cerevisiae</i> strain displays elevated virulence                                 | 5 | 3 |    |
| YDR323C | <i>PEP7</i>   | Multivalent adaptor protein that facilitates vesicle-mediated vacuolar protein sorting by ensuring high-fidelity vesicle docking and fusion, which are essential for targeting of vesicles to the endosome; required for vacuole | 2 | 2 |    |
| YDR392W | <i>SPT3</i>   | Subunit of the SAGA and SAGA-like transcriptional regulatory complexes, interacts with Spt15p to activate transcription of some RNA polymerase II-dependent genes, also functions to inhibit transcription at some promoters     | 4 | 3 |    |
| YDR410C | <i>STE14</i>  | farnesyl cysteine-carboxyl methyltransferase                                                                                                                                                                                     | 4 | 3 |    |
| YDR425W | <i>SNX41</i>  | Sorting nexin that mediates retrieval from endosomes                                                                                                                                                                             | 4 | 2 |    |
| YDR432W | <i>NPL3</i>   | RNA-binding protein that carries poly(A)+ mRNA from the nucleus into the cytoplasm; phosphorylation by Sky1p in the cytoplasm may promote release of mRNAs                                                                       | 4 | 5 |    |

|           |              |                                                                                                                                                                                                                     |   |   |    |
|-----------|--------------|---------------------------------------------------------------------------------------------------------------------------------------------------------------------------------------------------------------------|---|---|----|
| YDR448W   | <i>ADA2</i>  | transcription factor, member of ADA and SAGA, two transcriptional adaptor/HAT (histone acetyltransferase) complexes                                                                                                 | 4 | 5 |    |
| YDR486C   | <i>VPS60</i> | vacuolar protein sorting (putative)                                                                                                                                                                                 | 2 | 3 |    |
| YDR493W   | <i>FMP36</i> | The authentic, non-tagged protein was localized to the mitochondria                                                                                                                                                 | 2 | 2 |    |
| YEL003W   | <i>GIM4</i>  | Prefoldin subunit 2; putative homolog of subunit 2 of bovine prefoldin, a chaperone comprised of six subunits; bovine prefoldin subunit 2 homolog (putative)                                                        | 4 | 2 |    |
| YEL004W   | <i>YEA4</i>  | Shows sequence similarity to GOG5, a gene involved in vanadate resistance; similar to Gog5, which is involved in vanadate resistance                                                                                | 4 | 4 |    |
| YEL013W   | <i>VAC8</i>  | Phosphorylated vacuolar membrane protein that interacts with Atg13p, required for the cytoplasm-to-vacuole targeting (Cvt) pathway; interacts with Nvj1p to form nucleus-vacuole junctions                          | 5 | 4 | JC |
| YEL044W   | <i>IES6</i>  | Protein that associates with the INO80 chromatin remodeling complex under low-salt conditions                                                                                                                       | 1 | 2 |    |
| YER057C   | <i>HMF1</i>  | Member of the p14.5 protein family with similarity to Mmf1p, functionally complements Mmf1p function when targeted to mitochondria; heat shock inducible; high-dosage growth inhibitor; forms a homotrimer in vitro | 4 | 4 |    |
| YER060W-A | <i>FCY22</i> | Putative purine-cytosine permease, very similar to Fcy2p but cannot substitute for its function                                                                                                                     | 4 | 4 |    |
| YER145C   | <i>FTR1</i>  | High affinity iron permease involved in the transport of iron across the plasma membrane; forms complex with Fet3p; expression is regulated by iron                                                                 | 2 | 2 |    |
| YER155C   | <i>BEM2</i>  | Rho GTPase activating protein (RhoGAP) involved in the control of cytoskeleton organization and cellular morphogenesis; required for bud emergence                                                                  | 4 | 4 |    |
| YER173W   | <i>RAD24</i> | Checkpoint protein, involved in the activation of the DNA damage and meiotic pachytene checkpoints; subunit of a clamp loader that loads Rad17p·Mec3p-Ddc1p onto DNA; homolog of human and S. pombe Rad17 protein   | 2 | 2 |    |

|         |               |                                                                                                                                                                                                                            |   |   |
|---------|---------------|----------------------------------------------------------------------------------------------------------------------------------------------------------------------------------------------------------------------------|---|---|
| YFL001W | <i>DEG1</i>   | Non-essential tRNA:pseudouridine synthase, introduces pseudouridines at position 38 or 39 in tRNA, important for maintenance of translation efficiency and normal cell growth, localizes to both the nucleus and cytoplasm | 2 | 2 |
| YFL007W | <i>BLM3</i>   | Protein involved in assembly of proteasomal core particles in the nucleus; required for normal resistance to bleomycin, may be involved in protection against oxidative damage                                             | 2 | 2 |
| YFL034W | 0             | 0                                                                                                                                                                                                                          | 4 | 2 |
| YFL043C | 0             | 0                                                                                                                                                                                                                          | 4 | 3 |
| YFR009W | <i>GCN20</i>  | Positive regulator of the Gcn2p kinase activity, forms a complex with Gcn1p; proposed to stimulate Gcn2p activation by an uncharged tRNA                                                                                   | 2 | 2 |
| YFR010W | <i>UBP6</i>   | Ubiquitin-specific protease situated in the base subcomplex of the 26S proteasome, releases free ubiquitin from branched polyubiquitin chains; deletion causes hypersensitivity to cycloheximide and other toxic           | 4 | 2 |
| YFR012W | 0             | 0                                                                                                                                                                                                                          | 2 | 2 |
| YFR019W | <i>FAB1</i>   | 1-phosphatidylinositol-3-phosphate 5-kinase; vacuolar membrane kinase that generates phosphatidylinositol (3,5)P2, which is involved in vacuolar sorting and homeostasis                                                   | 2 | 2 |
| YGL016W | <i>KAP122</i> | Karyopherin beta, responsible for import of the Toa1p-Toa2p complex into the nucleus; binds to nucleoporins Nup1p and Nup2p; may play a role in regulation of pleiotropic drug resistance                                  | 2 | 4 |
| YGL057C | 0             | 0                                                                                                                                                                                                                          | 2 | 2 |
| YGL058W | <i>RAD6</i>   | Ubiquitin-conjugating enzyme (E2), involved in postreplication repair (with Rad18p), sporulation, telomere silencing, and ubiquitin-mediated N-end rule protein degradation (with Ubr1p)                                   | 5 | 5 |
| YGL066W | <i>SGF73</i>  | SaGa associated Factor 73kDa; Probable 73KkDa Subunit of SAGA histone acetyltransferase complex                                                                                                                            | 5 | 4 |

|         |              |                                                                                                                                                                                                                             |   |   |    |
|---------|--------------|-----------------------------------------------------------------------------------------------------------------------------------------------------------------------------------------------------------------------------|---|---|----|
| YGL078C | <i>DBP3</i>  | Putative ATP-dependent RNA helicase of the DEAD-box family involved in ribosomal biogenesis                                                                                                                                 | 1 | 1 |    |
| YGL154C | <i>LYS5</i>  | Phosphopantetheinyl transferase involved in lysine biosynthesis; converts inactive apo-form of Lys2p (alpha-aminoadipate reductase) into catalytically active holo-form by posttranslational addition of phosphopantetheine | 4 | 3 | SD |
| YGL170C | <i>SPO74</i> | Component of the meiotic outer plaque of the spindle pole body, involved in modifying the meiotic outer plaque that is required prior to prospore membrane formation                                                        | 4 | 3 |    |
| YGL173C | <i>KEM1</i>  | 5'-3' exonuclease involved in mRNA decay, evolutionarily conserved component of cytoplasmic processing (P) bodies, plays a role in microtubule-mediated processes, filamentous growth, and ribosomal RNA maturation         | 2 | 1 |    |
| YGL174W | <i>BUD13</i> | Protein involved in bud-site selection; diploid mutants display a unipolar budding pattern instead of the wild-type bipolar pattern                                                                                         | 4 | 4 |    |
| YGL212W | <i>VAM7</i>  | Regulator of vacuolar morphogenesis; hydrophilic protein, heptad repeat motif                                                                                                                                               | 2 | 2 |    |
| YGL243W | <i>TAD1</i>  | tRNA-specific adenosine deaminase, deaminates adenosine-37 to inosine in tRNA-Ala                                                                                                                                           | 4 | 2 |    |
| YGR056W | <i>RSC1</i>  | RSC1 is a member of RSC complex, which remodels the structure of chromatin; Member of RSC complex                                                                                                                           | 5 | 4 |    |
| YGR069W | 0            | 0                                                                                                                                                                                                                           | 5 | 2 |    |
| YGR125W | 0            | 0                                                                                                                                                                                                                           | 4 | 2 |    |
| YGR167W | <i>CLC1</i>  | Clathrin light chain                                                                                                                                                                                                        | 1 | 2 |    |
| YGR188C | <i>BUB1</i>  | checkpoint gene involved in permitting entry into mitosis depending upon the assembly state of microtubules; Serine/threonine protein kinase required for cell cycle arrest in response to loss of microtubule function     | 2 | 2 |    |

|           |               |                                                                                                                                                                                                    |   |   |    |
|-----------|---------------|----------------------------------------------------------------------------------------------------------------------------------------------------------------------------------------------------|---|---|----|
| YGR270W   | <i>YTA7</i>   | Protein of unknown function, member of CDC48/PAS1/SEC18 family of ATPases, potentially phosphorylated by Cdc28p                                                                                    | 4 | 4 |    |
| YHL003C   | <i>LAG1</i>   | Ceramide synthase component, involved in synthesis of ceramide from C26(acyl)-coenzyme A and dihydrosphingosine or phytosphingosine, functionally equivalent to Lac1p                              | 4 | 5 |    |
| YHL011C   | <i>PRS3</i>   | 5-phospho-ribosyl-1(alpha)-pyrophosphate synthetase, involved in nucleotide, histidine, and tryptophan biosynthesis; one of a five related enzymes, which are active as heteromultimeric complexes | 1 | 3 |    |
| YHL029C   | <i>0</i>      | 0                                                                                                                                                                                                  | 4 | 2 |    |
| YHL030W   | <i>ECM29</i>  | Major component of the proteasome; tethers the proteasome core particle to the regulatory particle, and enhances the stability of the proteasome                                                   | 5 | 4 |    |
| YHR008C   | <i>SOD2</i>   | Manganese-containing superoxide dismutase                                                                                                                                                          | 2 | 2 |    |
| YHR031C   | <i>RRM3</i>   | involved in rDNA replication and Ty1 transposition; DNA helicase                                                                                                                                   | 5 | 5 | JC |
| YHR048W   | <i>0</i>      | 0                                                                                                                                                                                                  | 4 | 3 |    |
| YHR154W   | <i>RTT107</i> | Regulator of Ty1 Transposition; Establishes Silent Chromatin; involved in silencing                                                                                                                | 4 | 3 | JC |
| YHR167W   | <i>THP2</i>   | affects transcription elongation                                                                                                                                                                   | 5 | 3 | SD |
| YHR177W   | <i>GON3</i>   | unknown                                                                                                                                                                                            | 4 | 4 |    |
| YIL009C-A | <i>EST3</i>   | Component of the telomerase holoenzyme, involved in telomere replication                                                                                                                           | 5 | 4 |    |

|         |               |                                                                                                                                                                                                                               |   |   |
|---------|---------------|-------------------------------------------------------------------------------------------------------------------------------------------------------------------------------------------------------------------------------|---|---|
| YIL011W | <i>TIR3</i>   | TIP1-related                                                                                                                                                                                                                  | 4 | 5 |
| YIL015W | <i>BAR1</i>   | Aspartyl protease secreted into the periplasmic space of mating type a cells, cleaves and inactivates alpha factor allowing cells to recover from alpha-factor-induced cell cycle arrest                                      | 5 | 5 |
| YIL044C | <i>AGE2</i>   | ADP-ribosylation factor (ARF) GTPase activating protein (GAP) effector ; ARF GAP with effector function(s)                                                                                                                    | 4 | 2 |
| YIL069C | <i>RPS24B</i> | Protein component of the small (40S) ribosomal subunit; identical to Rps24Ap and has similarity to rat S24 ribosomal protein                                                                                                  | 4 | 5 |
| YIL073C | <i>SPO22</i>  | Meiosis-specific protein with similarity to phospholipase A2, involved in completion of nuclear divisions during meiosis; induced early in meiosis                                                                            | 2 | 1 |
| YIL090W | 0             | 0                                                                                                                                                                                                                             | 4 | 4 |
| YIL121W | <i>QDR2</i>   | Multidrug transporter responsible for resistance to quinidine and barban; member of a family of drug:proton antiporters; plasma membrane transporter                                                                          | 5 | 2 |
| YIL125W | <i>KGD1</i>   | Component of the mitochondrial alpha-ketoglutarate dehydrogenase complex, which catalyzes a key step in the tricarboxylic acid (TCA) cycle, the oxidative decarboxylation of alpha-ketoglutarate to form succinyl-CoA         | 4 | 3 |
| YIL134W | <i>FLX1</i>   | Protein required for transport of flavin adenine dinucleotide (FAD) from mitochondria, where it is synthesized from riboflavin, to the cytosol                                                                                | 2 | 2 |
| YIR009W | <i>MSL1</i>   | U2B component of U2 snRNP, involved in splicing, binds the U2 snRNA stem-loop IV in vitro; does not contain the conserved C-terminal RNA binding domain found in other family members                                         | 4 | 3 |
| YIR021W | <i>MRS1</i>   | Protein required for the splicing of two mitochondrial group I introns (BI3 in COB and AI5beta in COX1); forms a splicing complex, containing four subunits of Mrs1p and two subunits of the BI3-encoded maturase, that binds | 4 | 4 |
| YIR037W | <i>HYR1</i>   | Thiol peroxidase that functions as a hydroperoxide receptor to sense intracellular hydroperoxide levels and transduce a redox signal to the Yap1p transcription factor                                                        | 4 | 2 |

|         |               |                                                                                                                                                                                                                           |   |   |    |
|---------|---------------|---------------------------------------------------------------------------------------------------------------------------------------------------------------------------------------------------------------------------|---|---|----|
| YIR038C | <i>GTT1</i>   | ER associated glutathione S-transferase capable of homodimerization; expression induced during the diauxic shift and throughout stationary phase; functional overlap with Gtt2p, Grx1p, and Grx2p                         | 4 | 3 |    |
| YJL006C | <i>CTK2</i>   | Beta subunit of C-terminal domain kinase I (CTDK-I), which phosphorylates the C-terminal repeated domain of the RNA polymerase II large subunit (Rpo21p) to affect both transcription and pre-mRNA 3' end processing; has | 1 | 2 |    |
| YJL047C | <i>RTT101</i> | Cullin family member; subunit of a complex containing ubiquitin ligase activity; binds HRT1 and is modified by the ubiquitin like protein, RUB1; Regulator of Ty1 Transposition; Regulator of Ty1 Transposition           | 4 | 4 | JC |
| YJL092W | <i>HPR5</i>   | DNA helicase and DNA-dependent ATPase involved in DNA repair, required for proper timing of commitment to meiotic recombination and the transition from Meiosis I to Meiosis II; potential Cdc28p substrate               | 4 | 4 |    |
| YJL132W | 0             | 0                                                                                                                                                                                                                         | 5 | 2 |    |
| YJR032W | <i>CPR7</i>   | Peptidyl-prolyl cis-trans isomerase (cyclophilin), catalyzes the cis-trans isomerization of peptide bonds N-terminal to proline residues; binds to Hsp82p and contributes to chaperone activity                           | 2 | 1 | SD |
| YJR040W | <i>GEF1</i>   | Chloride channel localized to late- or post-Golgi vesicles, involved in iron metabolism; highly homologous to voltage-gated chloride channels in vertebrates                                                              | 4 | 2 |    |
| YJR054W | 0             | 0                                                                                                                                                                                                                         | 4 | 3 |    |
| YJR056C | 0             | 0                                                                                                                                                                                                                         | 4 | 3 |    |
| YJR102C | <i>VPS25</i>  | vacuolar protein sorting (putative)                                                                                                                                                                                       | 1 | 2 |    |
| YJR120W | 0             | 0                                                                                                                                                                                                                         | 2 | 2 |    |
| YJR121W | <i>ATP2</i>   | Beta subunit of the F1 sector of mitochondrial F1F0 ATP synthase, which is a large, evolutionarily conserved enzyme complex required for ATP synthesis                                                                    | 2 | 2 |    |

|         |               |                                                                                                                                                                                                                            |   |    |    |
|---------|---------------|----------------------------------------------------------------------------------------------------------------------------------------------------------------------------------------------------------------------------|---|----|----|
| YKL006W | <i>RPL14A</i> | N-terminally acetylated protein component of the large (60S) ribosomal subunit, nearly identical to Rpl14Bp and has similarity to rat L14 ribosomal protein; rpl14a csh5 double null mutant exhibits synthetic slow growth | 4 | 2  | SD |
| YKL023W | 0             | 0                                                                                                                                                                                                                          | 5 | 3  |    |
| YKL027W | 0             | 0                                                                                                                                                                                                                          | 4 | 2  |    |
| YKL038W | <i>RGT1</i>   | transcriptional repressor and activator                                                                                                                                                                                    | 4 | 2  |    |
| YKL039W | <i>PTM1</i>   | Putative membrane protein                                                                                                                                                                                                  | 4 | 2  |    |
| YKL041W | <i>VPS24</i>  | involved in secretion                                                                                                                                                                                                      | 4 | 4G |    |
| YKL043W | <i>PHD1</i>   | protein similar to StuA of <i>Aspergillus nidulans</i> ; putative transcription factor                                                                                                                                     | 4 | 2  |    |
| YKL047W | 0             | 0                                                                                                                                                                                                                          | 5 | 2  |    |
| YKL053W | 0             | 0                                                                                                                                                                                                                          | 4 | 2  |    |
| YKL054C | <i>DEF1</i>   | RNAPII degradation factor, forms a complex with Rad26p in chromatin, enables ubiquitination and proteolysis of RNAPII                                                                                                      | 1 | 4G |    |
| YKL055C | <i>OAR1</i>   | Mitochondrial 3-oxoacyl-[acyl-carrier-protein] reductase, may comprise a type II mitochondrial fatty acid synthase along with Mct1p                                                                                        | 4 | 1  |    |
| YKL057C | <i>NUP120</i> | Subunit of the Nup84p subcomplex of the nuclear pore complex (NPC), required for even distribution of NPCs around the nuclear envelope, involved in establishment of a normal nucleocytoplasmic concentration              | 5 | 5  |    |

|         |               |                                                                                                                                                                                                                                   |   |   |    |
|---------|---------------|-----------------------------------------------------------------------------------------------------------------------------------------------------------------------------------------------------------------------------------|---|---|----|
| YKL062W | <i>MSN4</i>   | Zinc finger transcription factor, key regulator of stress-responsive gene expression; multicopy suppressor of <i>snf1</i> mutation                                                                                                | 4 | 2 |    |
| YKL068W | <i>NUP100</i> | Subunit of the nuclear pore complex (NPC) that is localized to both sides of the pore; contains a repetitive GLFG motif that interacts with mRNA export factor Mex67p and with karyopherin Kap95p; homologous to Nup116p          | 4 | 4 |    |
| YKL072W | <i>STB6</i>   | binds Sin3p in two-hybrid assay; involved in transcription                                                                                                                                                                        | 4 | 3 |    |
| YKL101W | <i>HSL1</i>   | Nim1p-related protein kinase that regulates the morphogenesis and septin checkpoints; associates with the assembled septin filament; required along with Hsl7p for bud neck recruitment, phosphorylation, and degradation of      | 5 | 3 | MA |
| YKL106W | <i>AAT1</i>   | Mitochondrial aspartate aminotransferase, catalyzes the conversion of oxaloacetate to aspartate in aspartate and asparagine biosynthesis                                                                                          | 4 | 1 |    |
| YKL113C | <i>RAD27</i>  | 5' to 3' exonuclease, 5' flap endonuclease, required for Okazaki fragment processing and maturation as well as for long-patch base-excision repair; member of the <i>S. pombe</i> RAD2/FEN1 family                                | 4 | 3 |    |
| YKL129C | <i>MYO3</i>   | One of two class-I myosins; localizes to actin cortical patches; deletion of MYO3 has little affect on growth, but <i>myo3 myo5</i> double deletion causes severe defects in growth and actin cytoskeleton organization; myosin I | 4 | 2 |    |
| YKL135C | <i>APL2</i>   | Beta-adaptin, large subunit of the clathrin-associated protein (AP-1) complex                                                                                                                                                     | 5 | 5 |    |
| YKL149C | <i>DBR1</i>   | RNA lariat debranching enzyme, involved in intron turnover; required for efficient Ty1 transposition                                                                                                                              | 1 | 2 | SD |
| YKL161C | 0             | 0                                                                                                                                                                                                                                 | 4 | 2 |    |
| YKL168C | <i>KKQ8</i>   | Putative serine/threonine protein kinase with unknown cellular role                                                                                                                                                               | 4 | 3 |    |
| YKR020W | <i>VPS51</i>  | whiskey ( <i>whi</i> ) mutant; forms a tetramer with VPS52, VPS53, and VPS54                                                                                                                                                      | 1 | 2 |    |

|           |                             |                                                                                                                                                                                                                   |   |   |    |
|-----------|-----------------------------|-------------------------------------------------------------------------------------------------------------------------------------------------------------------------------------------------------------------|---|---|----|
| YKR035W-A | <i>DID2</i>                 | Class E protein of the vacuolar protein-sorting (Vps) pathway, associates reversibly with the late endosome, has human ortholog that may be altered in breast tumors                                              | 5 | 2 |    |
| YKR054C   | <i>DYN1</i>                 | Cytoplasmic heavy chain dynein, microtubule motor protein, required for anaphase spindle elongation; involved in spindle assembly, chromosome movement, and spindle orientation during cell division, targeted to | 4 | 3 |    |
| YKR069W   | <i>MET1</i>                 | S-adenosyl-L-methionine uroporphyrinogen III transmethylase, involved in sulfate assimilation, methionine metabolism, and siroheme biosynthesis                                                                   | 4 | 3 |    |
| YKR082W   | <i>NUP133</i>               | Subunit of the Nup84p subcomplex of the nuclear pore complex (NPC), localizes to both sides of the NPC, required to establish a normal nucleocytoplasmic concentration gradient of the GTPase Gsp1p               | 5 | 4 | SD |
| YKR091W   | <i>SRL3</i>                 | Cytoplasmic protein that, when overexpressed, suppresses the lethality of a rad53 null mutation; potential Cdc28p substrate                                                                                       | 4 | 2 |    |
| YKR099W   | <i>BAS1</i>                 | Myb-related transcription factor involved in regulating basal and induced expression of genes of the purine and histidine biosynthesis pathways                                                                   | 2 | 2 |    |
| YLL002W   | <i>RTT109</i>               | Regulator of Ty1 Transposition; Regulation of mitochondrial network; Killed in Mutagen, sensitive to diepoxybutane and/or mitomycin C; diepoxybutane and mitomycin C resistance                                   | 5 | 4 | JC |
| YLL030C   | 0                           | 0                                                                                                                                                                                                                 | 5 | 4 |    |
| YLL044W   | 0                           | 0                                                                                                                                                                                                                 | 5 | 4 |    |
| YLR015W   | <i>BRE2</i>                 | Subunit of the COMPASS complex, which methylates histone H3 on lysine 4 and is required in transcriptional silencing near telomeres; has similarity to ASH2L member of trithorax proteins                         | 5 | 4 |    |
| YLR025W   | <i>SNF7</i><br><i>VPS32</i> | Involved in derepression of SUC2 in response to glucose limitation; involved in glucose derepression                                                                                                              | 1 | 2 |    |
| YLR031W   | 0                           | 0                                                                                                                                                                                                                 | 4 | 3 |    |

|         |              |                                                                                                                                                                                                                           |   |   |    |
|---------|--------------|---------------------------------------------------------------------------------------------------------------------------------------------------------------------------------------------------------------------------|---|---|----|
| YLR081W | <i>GAL2</i>  | Galactose permease, required for utilization of galactose; also able to transport glucose                                                                                                                                 | 2 | 4 |    |
| YLR118C | <i>APT1</i>  | hydrolase acting on ester bonds                                                                                                                                                                                           | 2 | 3 |    |
| YLR177W | 0            | 0                                                                                                                                                                                                                         | 4 | 3 |    |
| YLR181C | <i>VTA1</i>  | Protein involved in endosomal protein sorting; binds to Vps20 and Vps4 and may regulate Vps4 function; has coiled-coil domains; mutants show class E vacuolar-protein sorting defects                                     | 4 | 2 |    |
| YLR183C | <i>TOS4</i>  | Transcription factor that binds to a number of promoter regions, particularly promoters of some genes involved in pheromone response and cell cycle; potential Cdc28p substrate; expression is induced in G1 by bound SBF | 4 | 2 |    |
| YLR235C | 0            | 0                                                                                                                                                                                                                         | 5 | 4 |    |
| YLR242C | <i>ARV1</i>  | Protein with similarity to Nup120p and C.elegans R05H5.5 protein                                                                                                                                                          | 1 | 1 |    |
| YLR268W | <i>SEC22</i> | Identified in a screen for dense cells that accumulated invertase at the non-permissive temperature, SEC22 encodes a v-SNARE present on ER to Golgi vesicles and is involved in anterograde and retrograde transport      | 4 | 5 | SD |
| YLR384C | <i>IKI3</i>  | Subunit of RNA polymerase II elongator complex, which is a histone acetyltransferase; involved in maintaining structural integrity of the complex; iki3 mutations confer resistance to the K. lactis toxin zymocin        | 2 | 3 | SD |
| YLR399C | <i>BDF1</i>  | Protein involved in transcription initiation at TATA-containing promoters; associates with the basal transcription factor TFIID; contains two bromodomains; corresponds to the C-terminal region of mammalian TAF1;       | 4 | 5 |    |
| YLR417W | <i>VPS36</i> | Protein involved in vacuolar protein sorting                                                                                                                                                                              | 1 | 2 |    |
| YLR423C | <i>ATG17</i> | required for activation of Apg1 protein kinase; involved in autophagy                                                                                                                                                     | 1 | 1 | SD |

|           |              |                                                                                                                                                                                                                     |   |   |    |
|-----------|--------------|---------------------------------------------------------------------------------------------------------------------------------------------------------------------------------------------------------------------|---|---|----|
| YLR436C   | <i>ECM30</i> | Non-essential protein of unknown function                                                                                                                                                                           | 4 | 2 | MA |
| YML051W   | <i>GAL80</i> | Transcriptional regulator involved in the repression of GAL genes in the absence of galactose; inhibits transcriptional activation by Gal4p; inhibition relieved by Gal3p or Gal1p binding                          | 5 | 5 |    |
| YML063W   | <i>RPS1B</i> | Ribosomal protein 10 (rp10) of the small (40S) subunit; nearly identical to Rps1Ap and has similarity to rat S3a ribosomal protein                                                                                  | 1 | L |    |
| YML073C   | <i>RPL6A</i> | N-terminally acetylated protein component of the large (60S) ribosomal subunit, has similarity to Rpl6Bp and to rat L6 ribosomal protein; binds to 5.8S rRNA                                                        | 2 | 1 | SD |
| YML081C-A | <i>ATP18</i> | Subunit of the mitochondrial F1F0 ATP synthase, which is a large enzyme complex required for ATP synthesis; termed subunit I or subunit j; does not correspond to known ATP synthase subunits in other organisms    | 2 | 2 |    |
| YML090W   | 0            | 0                                                                                                                                                                                                                   | 2 | 4 |    |
| YML097C   | <i>VPS9</i>  | Protein required for Golgi to vacuole trafficking, has similarity with mammalian ras inhibitors                                                                                                                     | 1 | 1 | SD |
| YMR014W   | <i>BUD22</i> | Protein involved in bud-site selection; diploid mutants display a random budding pattern instead of the wild-type bipolar pattern                                                                                   | 1 | 5 |    |
| YMR039C   | <i>SUB1</i>  | Suppressor of TFIIIB mutations; transcriptional coactivator                                                                                                                                                         | 2 | 3 | SD |
| YMR048W   | <i>CSM3</i>  | Protein required for accurate chromosome segregation during meiosis                                                                                                                                                 | 4 | 4 |    |
| YMR058W   | <i>FET3</i>  | Ferro-O <sub>2</sub> -oxidoreductase required for high-affinity iron uptake and involved in mediating resistance to copper ion toxicity, belongs to class of integral membrane multicopper oxidases                 | 2 | 2 |    |
| YMR070W   | <i>MOT3</i>  | Nuclear transcription factor with two Cys2-His2 zinc fingers; involved in repression of a subset of hypoxic genes by Rox1p, repression of several DAN/TIR genes during aerobic growth, and repression of ergosterol | 4 | 3 |    |

|           |               |                                                                                                                                                                                                  |   |   |    |
|-----------|---------------|--------------------------------------------------------------------------------------------------------------------------------------------------------------------------------------------------|---|---|----|
| YMR077C   | <i>VPS20</i>  | vacuolar protein sorting (putative)                                                                                                                                                              | 1 | 1 |    |
| YMR085W   | 0             | 0                                                                                                                                                                                                | 4 | 3 |    |
| YMR088C   | 0             | 0                                                                                                                                                                                                | 4 | 3 |    |
| YMR116C   | <i>ASC1</i>   | WD repeat protein (G-beta like protein) that interacts with the translational machinery; G-beta like protein                                                                                     | 1 | 1 |    |
| YMR123W   | <i>PKR1</i>   | Pichia farinosa Killer toxin Resistance; Pichia farinosa killer toxin resistance                                                                                                                 | 2 | 2 |    |
| YMR143W   | <i>RPS16A</i> | Protein component of the small (40S) ribosomal subunit; identical to Rps16Bp and has similarity to E. coli S9 and rat S16 ribosomal proteins                                                     | 1 | 4 |    |
| YMR154C   | <i>RIM13</i>  | Regulator of IME2 (RIM); Cysteine protease similar to E. nidulans palB                                                                                                                           | 2 | 2 | MA |
| YMR158W-B | 0             | 0                                                                                                                                                                                                | 2 | 2 |    |
| YMR190C   | <i>SGS1</i>   | Nucleolar DNA helicase of the RecQ family, involved in maintenance of genome integrity; has similarity to human BLM and WRN helicases implicated in Bloom and Werner syndromes                   | 5 | 4 | JC |
| YMR201C   | <i>RAD14</i>  | Protein that recognizes and binds damaged DNA during nucleotide excision repair; subunit of Nucleotide Excision Repair Factor 1 (NEF1); contains zinc finger motif; homolog of human XPA protein | 4 | 3 |    |
| YMR206W   | 0             | 0                                                                                                                                                                                                | 4 | 2 |    |
| YMR242C   | <i>RPL20A</i> | Protein component of the large (60S) ribosomal subunit, nearly identical to Rpl20Bp and has similarity to rat L18a ribosomal protein                                                             | 2 | 3 |    |

|         |       |                                                                                                                                                                                                       |  |   |   |       |
|---------|-------|-------------------------------------------------------------------------------------------------------------------------------------------------------------------------------------------------------|--|---|---|-------|
| YMR258C | 0     | 0                                                                                                                                                                                                     |  | 4 | 2 |       |
| YNL059C | ARP5  | Actin-related protein, involved in the carboxypeptidase Y pathway                                                                                                                                     |  | 1 | 2 |       |
| YNL136W | EAF7  | Subunit of the NuA4 histone acetyltransferase complex                                                                                                                                                 |  | 2 | 1 |       |
| YNL138W | SRV2  | Adenylyl cyclase-associated protein; N-terminal domain appears to be involved in cellular responsiveness to RAS                                                                                       |  | 5 | 5 |       |
| YNL153C | GIM3  | Prefoldin subunit 4; putative homolog of subunit 4 of bovine prefoldin, a chaperone comprised of six subunits; bovine prefoldin subunit 4 homolog (putative)                                          |  | 1 | 3 |       |
| YNL212W | VID27 | Vacuole import and degradation                                                                                                                                                                        |  | 5 | 3 |       |
| YNL224C | 0     | 0                                                                                                                                                                                                     |  | 1 | 1 |       |
| YNL236W | SIN4  | involved in positive and negative regulation of transcription, possibly via changes in chromatin structure; regulation of YGP1 expression; component of RNA polymerase II holoenzyme/mediator complex |  | 1 | 2 | SD MA |
| YNL242W | ATG2  | Defective in autophagy; required for sporulation; Required for sporulation.                                                                                                                           |  | 4 | 4 |       |
| YNL250W | RAD50 | Subunit of MRX complex, with Mre11p and Xrs2p, involved in processing double-strand DNA breaks in vegetative cells, initiation of meiotic DSBs, telomere maintenance, and nonhomologous end joining   |  | 4 | 3 | JC    |
| YNL283C | WSC2  | cell wall integrity and stress response component 2; Putative integral membrane protein containing novel cysteine motif. Similarity to SLG1 (WSC1), WSC3 and WSC4                                     |  | 4 | 3 |       |
| YNL285W | 0     | 0                                                                                                                                                                                                     |  | 4 | 3 |       |

|         |              |                                                                                                                                                                                                                           |   |   |    |
|---------|--------------|---------------------------------------------------------------------------------------------------------------------------------------------------------------------------------------------------------------------------|---|---|----|
| YNL293W | <i>MSB3</i>  | GTPase-activating protein for Sec4p and several other Rab GTPases, regulates exocytosis via its action on Sec4p, also required for proper actin organization; similar to Msb4p; both Msb3p and Msb4p localize to sites of | 4 | 3 |    |
| YNL321W | 0            | 0                                                                                                                                                                                                                         | 4 | 3 |    |
| YNR006W | <i>VPS27</i> | hydrophilic protein; has cysteine rich putative zinc finger essential for function                                                                                                                                        | 1 | 2 |    |
| YNR052C | <i>POP2</i>  | RNase of the DEDD superfamily, subunit of the Ccr4-Not complex that mediates 3' to 5' mRNA deadenylation                                                                                                                  | 5 | 5 | SD |
| YNR059W | <i>MNT4</i>  | Putative alpha-1,3-mannosyltransferase, not required for protein O-glycosylation                                                                                                                                          | 2 | 2 |    |
| YOL007C | 0            | 0                                                                                                                                                                                                                         | 4 | 3 |    |
| YOL041C | <i>NOP12</i> | Nucleolar protein, required for pre-25S rRNA processing; contains an RNA recognition motif (RRM) and has similarity to Nop13p, Nsr1p, and putative orthologs in Drosophila and S. pombe                                   | 2 | 5 | SD |
| YOL060C | <i>MAM3</i>  | Protein required for normal mitochondrial morphology, has similarity to hemolysins                                                                                                                                        | 4 | 3 |    |
| YOL083W | 0            | 0                                                                                                                                                                                                                         | 2 | 2 |    |
| YOL141W | <i>PPM2</i>  | Putative carboxyl methyl transferase, has similarity to Ppm1p but biochemical activity not yet demonstrated                                                                                                               | 4 | 2 |    |
| YOL159C | 0            | 0                                                                                                                                                                                                                         | 4 | 3 | SD |
| YOR006C | 0            | 0                                                                                                                                                                                                                         | 5 | 3 |    |

|         |               |                                                                                                                                                                                                              |  |   |   |    |
|---------|---------------|--------------------------------------------------------------------------------------------------------------------------------------------------------------------------------------------------------------|--|---|---|----|
| YOR009W | <i>TIR4</i>   | 0                                                                                                                                                                                                            |  | 4 | 3 |    |
| YOR039W | <i>CKB2</i>   | protein kinase CK2, beta' subunit                                                                                                                                                                            |  | 5 | 4 |    |
| YOR051C | 0             | 0                                                                                                                                                                                                            |  | 4 | 2 |    |
| YOR144C | <i>ELG1</i>   | Protein required for S phase progression and telomere homeostasis, forms an alternative replication factor C complex important for DNA replication and genome integrity; mutants are sensitive to DNA damage |  | 4 | 4 | JC |
| YOR270C | <i>VPH1</i>   | vacuolar ATPase V0 domain subunit a (100 kDa)                                                                                                                                                                |  | 1 | 1 | SD |
| YOR275C | <i>RIM20</i>  | Regulator of IME2                                                                                                                                                                                            |  | 2 | 2 |    |
| YOR293W | <i>RPS10A</i> | Protein component of the small (40S) ribosomal subunit; nearly identical to Rps10Bp and has similarity to rat ribosomal protein S10                                                                          |  | 2 | 5 | SD |
| YOR321W | <i>PMT3</i>   | Transfers mannose residues from dolichyl phosphate-D-mannose to specific serine/threonine residues of proteins in the secretory pathway; dolichyl phosphate-D-mannose:protein O-D-mannosyltransferase        |  | 4 | 2 |    |
| YOR364W | 0             | 0                                                                                                                                                                                                            |  | 4 | 3 |    |
| YPL002C | <i>SNF8</i>   | appears to be functionally related to SNF7; involved in glucose derepression                                                                                                                                 |  | 1 | 2 |    |
| YPL024W | <i>NCE4</i>   | involved in cell separation                                                                                                                                                                                  |  | 4 | 5 |    |
| YPL042C | <i>SSN3</i>   | Component of RNA polymerase II holoenzyme, involved in RNA pol II carboxy-terminal domain phosphorylation                                                                                                    |  | 1 | 1 |    |

|         |               |                                                                                                                                                                                                                                  |   |   |    |
|---------|---------------|----------------------------------------------------------------------------------------------------------------------------------------------------------------------------------------------------------------------------------|---|---|----|
| YPL065W | <i>VPS28</i>  | soluble, hydrophilic protein involved in transport of precursors for soluble vacuolar hydrolases from the late endosome to the vacuole; involved in vacuolar protein targeting                                                   | 1 | 2 |    |
| YPL084W | <i>BRO1</i>   | BCK1-like resistance to osmotic shock                                                                                                                                                                                            | 1 | 2 | MA |
| YPL119C | <i>DBP1</i>   | Putative ATP-dependent RNA helicase of the DEAD-box protein family; mutants show reduced stability of the 40S ribosomal subunit scanning through 5' untranslated regions of mRNAs                                                | 4 | 3 |    |
| YPL125W | <i>KAP120</i> | Karyopherin with a role in the assembly or export of 60S ribosomal subunits                                                                                                                                                      | 1 | 1 |    |
| YPL129W | <i>TAF14</i>  | Subunit (30 kDa) of TFIID, TFIIF, and SWI/SNF complexes, involved in RNA polymerase II transcription initiation and in chromatin modification                                                                                    | 4 | 3 |    |
| YPL152W | <i>RRD2</i>   | Resistant to Rapamycin Deletion 2; similar to phosphotyrosyl phosphatase activator (PTPA) from several organisms                                                                                                                 | 4 | 3 | JC |
| YPL225W | 0             | 0                                                                                                                                                                                                                                | 2 | 2 |    |
| YPL240C | <i>HSP82</i>  | Cytoplasmic chaperone (Hsp90 family) required for pheromone signaling and negative regulation of Hsf1p; docks with the mitochondrial import receptor Tom70p for preprotein delivery; interacts with co-chaperones                | 4 | 2 |    |
| YPL256C | <i>CLN2</i>   | role in cell cycle START; G(sub)1 cyclin                                                                                                                                                                                         | 4 | 4 |    |
| YPL269W | <i>KAR9</i>   | Karyogamy protein required for correct positioning of the mitotic spindle and for orienting cytoplasmic microtubules, localizes at the shmoo tip in mating cells and at the tip of the growing bud in small-budded cells through | 4 | 3 |    |
| YPR119W | <i>CLB2</i>   | Involved in mitotic induction; G(sub)2-specific B-type cyclin                                                                                                                                                                    | 4 | 4 |    |
| YPR135W | <i>CTF4</i>   | Chromatin-associated protein, required for sister chromatid cohesion; interacts with DNA polymerase alpha (Pol1p) and may link DNA synthesis to sister chromatid cohesion                                                        | 4 | 1 |    |

|         |             |                                                                                                                        |   |   |    |
|---------|-------------|------------------------------------------------------------------------------------------------------------------------|---|---|----|
| YPR164W | <i>MMS1</i> | sensitive to methyl methanesulfonate (MMS), diepoxybutane, and mitomycin C; sensitive to diepoxybutane and mitomycin C | 4 | 1 | JC |
| YPR173C | <i>VPS4</i> | Defective in vacuolar protein sorting; homologous to mouse SKD1 and to human hVPS4; AAA-type ATPase                    | 1 | 1 |    |

<sup>1</sup> Description downloaded as described under GOnet in Materials and Methods

<sup>2</sup> Other screens are: Ty1, Scholes et al. (JC); Ty1, Griffith et al. (SD); and Ty3, Aye et al. (MA)

**Sup. Table 2B. Pairs of closely spaced ORFs among the genes affecting high-copy Ty3-*HIS3* transposition**

| ORF             | Name          | Description <sup>1</sup>                                                                                                                                                                                                              | High-copy tpn | Low-copy tpn |
|-----------------|---------------|---------------------------------------------------------------------------------------------------------------------------------------------------------------------------------------------------------------------------------------|---------------|--------------|
| YBL006C         | <i>LDB7</i>   | Protein of unknown function; null mutant shows a reduced affinity for the alcian blue dye suggesting a decreased net negative charge of the cell surface                                                                              | 5             | 5            |
| YBL007C         | <i>SLA1</i>   | Protein involved in assembly of the cortical actin cytoskeleton, contains 3 SH3 domains, interacts with Bee1p                                                                                                                         | 1             | 1            |
| YBR297W         | <i>MAL33</i>  | MAL-activator protein, part of complex locus MAL3; nonfunctional in genomic reference strain S288C                                                                                                                                    | 4             | 3            |
| YBR298C         | <i>MAL31</i>  | Maltose permease, high-affinity maltose transporter (alpha-glucoside transporter); encoded in the MAL3 complex locus; member of the 12 transmembrane domain superfamily of sugar transporters; functional in genomic                  | 4             | 3            |
| YCL061C/YCL060C | <i>MRC1</i>   | S-phase checkpoint protein found at replication forks, required for DNA replication; also required for Rad53p activation during DNA replication stress, where it forms a replication-pausing complex with Tof1p and is phosphorylated | 4             | 4            |
| YDR289C         | <i>RTT103</i> | Regulator of Ty1 Transposition; regulator of Ty1 Transposition                                                                                                                                                                        | 5             | 5            |
| YDR290W         | <i>0</i>      | Sick Without Securin; HU sensitive mutant; name reserved Orna Cohen-Fix                                                                                                                                                               | 5             | 5            |
| YEL003W         | <i>GIM4</i>   | Prefoldin subunit 2; putative homolog of subunit 2 of bovine prefoldin, a chaperone comprised of six subunits; bovine prefoldin subunit 2 homolog (putative)                                                                          | 4             | 2            |
| YEL004W         | <i>YEA4</i>   | Shows sequence similarity to GOG5, a gene involved in vanadate resistance; similar to Gog5, which is involved in vanadate resistance                                                                                                  | 4             | 4            |
| YFR009W         | <i>GCN20</i>  | Positive regulator of the Gcn2p kinase activity, forms a complex with Gcn1p; proposed to stimulate Gcn2p activation by an uncharged tRNA                                                                                              | 2             | 2            |

|         |              |                                                                                                                                                                                                                            |   |   |
|---------|--------------|----------------------------------------------------------------------------------------------------------------------------------------------------------------------------------------------------------------------------|---|---|
| YFR010W | <i>UBP6</i>  | Ubiquitin-specific protease situated in the base subcomplex of the 26S proteasome, releases free ubiquitin from branched polyubiquitin chains; deletion causes hypersensitivity to cycloheximide and other toxic compounds | 4 | 2 |
| YGL057C | <i>0</i>     | 0                                                                                                                                                                                                                          | 2 | 2 |
| YGL058W | <i>RAD6</i>  | Ubiquitin-conjugating enzyme (E2), involved in postreplication repair (with Rad18p), sporulation, telomere silencing, and ubiquitin-mediated N-end rule protein degradation (with Ubr1p)                                   | 5 | 5 |
| YGL173C | <i>KEM1</i>  | 5'-3' exonuclease involved in mRNA decay, evolutionarily conserved component of cytoplasmic processing (P) bodies, plays a role in microtubule-mediated processes, filamentous growth, and ribosomal RNA maturation        | 2 | 1 |
| YGL174W | <i>BUD13</i> | Protein involved in bud-site selection; diploid mutants display a unipolar budding pattern instead of the wild-type bipolar pattern                                                                                        | 4 | 4 |
| YIR037W | <i>HYR1</i>  | Thiol peroxidase that functions as a hydroperoxide receptor to sense intracellular hydroperoxide levels and transduce a redox signal to the Yap1p transcription factor                                                     | 4 | 2 |
| YIR038C | <i>GTT1</i>  | ER associated glutathione S-transferase capable of homodimerization; expression induced during the diauxic shift and throughout stationary phase; functional overlap with Gtt2p, Grx1p, and Grx2p                          | 4 | 3 |
| YJR120W | <i>0</i>     | 0                                                                                                                                                                                                                          | 2 | 2 |
| YJR121W | <i>ATP2</i>  | Beta subunit of the F1 sector of mitochondrial F1F0 ATP synthase, which is a large, evolutionarily conserved enzyme complex required for ATP synthesis                                                                     | 2 | 2 |
| YKL038W | <i>RGT1</i>  | transcriptional repressor and activator                                                                                                                                                                                    | 4 | 2 |
| YKL039W | <i>PTM1</i>  | Putative membrane protein                                                                                                                                                                                                  | 4 | 2 |
| YKL054C | <i>DEF1</i>  | RNAPII degradation factor, forms a complex with Rad26p in chromatin, enables ubiquitination and proteolysis of RNAPII                                                                                                      | 1 | 4 |

Sup. Table 3. Mutants affected in high- and low-copy Ty3#IS3 transposition

| ORF     | Name              | Table 1 designation           | Sup. Fig. 1 <sup>L</sup> | CA:Gag3 <sup>2</sup> | Gag3:PGK <sup>2</sup> | IN:PGK <sup>2</sup> | plasmid trans 1 <sup>2</sup> | plasmid trans 2 <sup>2</sup> | cDNA/plasmid <sup>2</sup> | Description <sup>4</sup>                                                                                                                                                                                                                                     | Gene Product <sup>6</sup>                                                                             | Function <sup>8</sup>                                       | Process <sup>6</sup>                              | Component <sup>6</sup>             | High-copy tpn | Low-copy tpn | Other Screens <sup>7</sup> |
|---------|-------------------|-------------------------------|--------------------------|----------------------|-----------------------|---------------------|------------------------------|------------------------------|---------------------------|--------------------------------------------------------------------------------------------------------------------------------------------------------------------------------------------------------------------------------------------------------------|-------------------------------------------------------------------------------------------------------|-------------------------------------------------------------|---------------------------------------------------|------------------------------------|---------------|--------------|----------------------------|
| YJR032W | <i>CPR7</i>       | stress/chaperone/modification |                          | 3                    | 3                     | 3                   | 3                            | 3                            | 0.43                      | Peptidyl-prolyl cis-trans isomerase (cyclophilin), catalyzes the cis-trans isomerization of peptide bonds terminal to proline residues; binds to Hsp82p and contributes to chaperone activity                                                                | N-cyclophilin 40/peptidyl-prolyl cis-trans isomerase (PPIase)                                         | unfolded protein binding*                                   | response to stress                                | cytosol                            | 2             |              |                            |
| YJL047C | <i>RTT101</i>     | stress/chaperone/modification | L                        | 3                    | 3                     | 3                   | 3                            | 3                            | 1.04                      | Cullin family member; subunit of a complex containing ubiquitin ligase activity; binds HRT1 and is modified by the ubiquitin-like protein, RUB1; Regulator of Ty1 Transposition                                                                              | 0                                                                                                     | protein binding*                                            | ubiquitin-dependent protein catabolism*           | cytoplasm                          | 4             | 4            | JC                         |
| YDR139C | <i>RUB1</i>       | stress/chaperone/modification | L                        | 3                    | 3                     | 3                   | 3                            | 3                            | 0.58                      | Related to ubiquitin (53% identical). Homolog of mammalian ubiquitin-like protein NEDD8. Matures by proteolytic removal of C-terminal asparagine (ASN) residue. Requires the proteins ULA1 & UBA3 for activation; ubiquitin-like protein                     | ubiquitin-like protein                                                                                | protein binding                                             | NEDD8 class-dependent protein catabolism          | cytoplasm                          | 2             | 2            |                            |
| YFL007W | <i>BLM3</i>       | stress/chaperone/modification | L                        | 3                    | 3                     | ?                   | 3                            | 1                            | 0.42                      | Protein involved in assembly of proteasomal core particles in the nucleus; required for normal resistance to bleomycin, may be involved in protection against oxidative damage                                                                               | bleomycin damage                                                                                      | molecular_function unknown                                  | biological_process unknown                        | membrane                           | 2             | 2            |                            |
| YBL007C | <i>SLA1</i>       | cytoskeleton                  | K                        | 3                    | 3                     | 3                   | 2                            | 2                            | 0.62                      | Protein involved in assembly of the cortical actin cytoskeleton, contains 3 SH3 domains, interacts with Bee1p                                                                                                                                                | cytoskeletal protein binding protein                                                                  | protein binding, bridging*                                  | cell wall organization and biogenesis*            | actin cortical patch (sensu Fungi) | 1             | 1            |                            |
| YNL059C | <i>ARP5</i>       | cytoskeleton                  | K                        | 3                    | 3                     | 3                   | 3                            | 3                            | 0.40                      | Actin-related protein, involved in the carboxypeptidase Y pathway                                                                                                                                                                                            | actin related protein                                                                                 | molecular_function unknown                                  | protein-vacuolar targeting                        | nucleus                            | 1             | 2            |                            |
| YGL212W | <i>VAM7</i>       | trafficking                   | H                        | 3                    | 3                     | 3                   | 2                            | 0                            | 0.36*                     | Regulator of vacuolar morphogenesis; hydrophilic protein, heptad repeat motif                                                                                                                                                                                | heptad repeat motif/hydrophilic protein                                                               | v-SNARE activity                                            | vesicle fusion*                                   | vacuolar membrane (sensu Fungi)    | 2             | 2            |                            |
| YEL013W | <i>VAC8</i>       | trafficking                   | H                        | 3                    | 3                     | 3                   | 1                            | 2                            | 0.61                      | Phosphorylated vacuolar membrane protein that interacts with Atg13p, required for the cytoplasm-to-vacuole targeting (Cvt) pathway; interacts with Nvj1p to form nucleus-vacuole junctions                                                                   | 0                                                                                                     | protein binding                                             | protein-vacuolar targeting*                       | vacuole (sensu Fungi)              | 5             | 4            | JC                         |
| YLR423C | <i>ATG17</i>      | trafficking                   | H                        | 3                    | 3                     | 3                   | 2                            | 2                            | 0.97                      | required for activation of Apg1 protein kinase; involved in autophagy                                                                                                                                                                                        | 0                                                                                                     | kinase activator activity                                   | autophagy                                         | cytoplasm                          | 1             | 1            | SD                         |
| YOR270C | <i>VPH1</i>       | trafficking                   | H                        | 3                    | 3                     | 3                   | 3                            | 3                            | 0.46                      | vacuolar ATPase V0 domain subunit a (100 kDa)                                                                                                                                                                                                                | V0 sector subunit/essential for vacuolar acidification and vacuolar H-ATPase activity/vacuolar ATPase | hydrogen-transporting ATPase activity, rotational mechanism | vacuolar acidification*                           | vacuole*                           | 1             | 1            | SD                         |
| YNR006W | <i>VPS27</i>      | trafficking                   | F                        | 3                    | 3                     | 3                   | 3                            | 2                            | 0.25                      | hydrophilic protein; has cysteine rich putative zinc finger essential for function                                                                                                                                                                           | cysteine rich putative zinc finger essential for function/hydrophilic protein                         | protein binding                                             | protein-Golgi retention*                          | endosome                           | 1             | 2            |                            |
| YPL065W | <i>VPS28</i>      | trafficking                   | F                        | 3                    | 3                     | 3                   | 2                            | 1                            | 0.71                      | soluble, hydrophilic protein involved in transport of precursors for soluble vacuolar hydrolases from the late endosome to the vacuole; involved in vacuolar protein targeting                                                                               | 0                                                                                                     | molecular_function unknown                                  | protein-vacuolar targeting*                       | endosome*                          | 1             | 2            |                            |
| YLR417W | <i>VPS36</i>      | trafficking                   | F                        | 3                    | 3                     | 3                   | 1                            | 2                            | 0.46                      | Protein involved in vacuolar protein sorting                                                                                                                                                                                                                 | 0                                                                                                     | regulator of G-protein signaling activity                   | protein-vacuolar targeting*                       | ESCRT II complex                   | 1             | 2            |                            |
| YJR102C | <i>VPS25</i>      | trafficking                   | F                        | 3                    | 3                     | 3                   | 2                            | 2                            | 0.25                      | vacuolar protein sorting (putative)                                                                                                                                                                                                                          | 0                                                                                                     | molecular_function unknown                                  | protein-vacuolar targeting*                       | ESCRT II complex                   | 1             | 2            |                            |
| YPL002C | <i>SNF8</i>       | trafficking                   | F                        | 3                    | 3                     | 3                   | 2                            | 2                            | 0.30                      | appears to be functionally related to SNF7; involved in glucose derepression                                                                                                                                                                                 | 0                                                                                                     | molecular_function unknown                                  | protein-vacuolar targeting*                       | ESCRT II complex                   | 1             | 2            |                            |
| YMR077C | <i>VPS20</i>      | trafficking                   | F                        | 3                    | 3                     | 3                   | 3                            | 3                            | 0.41                      | vacuolar protein sorting (putative)                                                                                                                                                                                                                          | 0                                                                                                     | molecular_function unknown                                  | late endosome to vacuole transport                | cytoplasm*                         | 1             | 1            |                            |
| YLR025W | <i>SNF7 VPS32</i> | trafficking                   | G                        | 3                    | 1                     | 1                   | 3                            | 3                            | 0.30                      | Involved in derepression of SUC2 in response to glucose limitation; involved in glucose derepression                                                                                                                                                         | 0                                                                                                     | molecular_function unknown                                  | late endosome to vacuole transport                | cytoplasm*                         | 1             | 2            |                            |
| YOR275C | <i>IME2</i>       | trafficking                   | G                        | 3                    | 3                     | 3                   | 3                            | 3                            | 0.11                      | Regulator of IME2                                                                                                                                                                                                                                            | Unknown function                                                                                      | molecular_function unknown                                  | proteolysis and peptidolysis*                     | cytoplasm*                         | 2             | 2            |                            |
| YPL084W | <i>BRO1</i>       | trafficking                   | G                        | 2                    | 3                     | 3                   | 3                            | 3                            | 0.31                      | BCK1-like resistance to osmotic shock                                                                                                                                                                                                                        | 0                                                                                                     | intracellular transporter activity                          | ubiquitin-dependent protein catabolism*           | cytoplasm*                         | 1             | 2            | MA                         |
| YPR173C | <i>VPS4</i>       | trafficking                   | G                        | 2                    | 3                     | 3                   | 2                            | 2                            | 0.34                      | Defective in vacuolar protein sorting; homologous to mouse SKD1 and to human hVPS4; AAA-type ATPase                                                                                                                                                          | AAA ATPase                                                                                            | ATPase activity                                             | late endosome to vacuole transport*               | cytoplasm*                         | 1             | 1            |                            |
| YLR268W | <i>SEC22</i>      | trafficking                   | E                        | 3                    | 3                     | 3                   | 3                            | 3                            | 0.28                      | Identified in a screen for dense cells that accumulated invertase at the non-permissive temperature, SEC22 encodes a v-SNARE present on ER to Golgi vesicles and is involved in anterograde and retrograde transport between the ER and Golgi; Synaptobrevin | 0                                                                                                     | v-SNARE activity                                            | ER to Golgi transport*                            | endoplasmic reticulum*             | 4             | 5            | SD                         |
| YNR059W | <i>MNT4</i>       | trafficking                   | E                        | 3                    | 3                     | 3                   | 3                            | 3                            | 0.21                      | Putative alpha-1,3-mannosyltransferase, not required for protein O-glycosylation                                                                                                                                                                             | mannosyltransferase (putative)                                                                        | alpha-1,3-mannosyltransferase activity                      | O-linked glycosylation                            | cellular_component unknown         | 2             | 2            |                            |
| YGR167W | <i>CLC1</i>       | trafficking                   | E                        | 3                    | 3                     | 3                   | 2                            | 2                            | 0.58                      | Clathrin light chain                                                                                                                                                                                                                                         | clathrin light chain                                                                                  | structural molecule activity                                | vesicle-mediated transport                        | clathrin vesicle coat              | 1             | 2            |                            |
| YFR019W | <i>FAB1</i>       | trafficking                   | E                        | 3                    | 3                     | 3                   | 3                            | 3                            | 0.40                      | 1-phosphatidylinositol-3-phosphate 5-kinase; vacuolar membrane kinase that generates phosphatidylinositol (3,5)P2, which is involved in vacuolar sorting and homeostasis                                                                                     | 1-phosphatidylinositol-3-phosphate 5-kinase                                                           | 1-phosphatidylinositol-3-phosphate 5-kinase activity        | response to stress*                               | vacuolar membrane                  | 2             | 2            |                            |
| YML097C | <i>VPS9</i>       | trafficking                   | E                        | 3                    | 3                     | 3                   | 3                            | 3                            | 0.23                      | Protein required for Golgi to vacuole trafficking, has similarity with mammalian ras inhibitors                                                                                                                                                              | 0                                                                                                     | guanyl-nucleotide exchange factor activity                  | protein-vacuolar targeting                        | cytosol                            | 1             | 1            | SD                         |
| YDR323C | <i>PEP7</i>       | trafficking                   | E                        | 3                    | 5                     | 5                   | 4                            | 4                            | 0.24                      | Multivalent adaptor protein that facilitates vesicle-mediated vacuolar protein sorting by ensuring high-fidelity vesicle docking and fusion, which are essential for targeting of vesicles to the endosome; required for vacuole inheritance                 | three zinc fingers; cysteine rich regions of amino acids are essential for function                   | molecular_function unknown                                  | vesicle fusion*                                   | cytoplasm*                         | 2             | 2            |                            |
| YGL078C | <i>DBP3</i>       | RNA processing                | D                        | 3                    | 4                     | 4                   | 3                            | 3                            | wt                        | Putative ATP-dependent RNA helicase of the DEAD-box family involved in ribosomal biogenesis                                                                                                                                                                  | ATP dependent RNA helicase/dead/deah box protein CA3                                                  | ATP-dependent RNA helicase activity                         | 35S primary transcript processing*                | nucleolus                          | 1             | 1            | SD                         |
| YFL001W | <i>DEG1</i>       | RNA processing                | D                        | 3                    | 4                     | 4                   | 3                            | 3                            | 0.90                      | Non-essential tRNA:pseudouridine synthase, introduces pseudouridines at position 38 or 39 in tRNA, important for maintenance of translation efficiency and normal cell growth, localizes to both the nucleus and cytoplasm                                   | 0                                                                                                     | pseudouridylation synthase activity                         | RNA processing                                    | cytoplasm*                         | 2             | 2            |                            |
| YNR052C | <i>POP2</i>       | RNA processing                | D                        | 3                    | 2                     |                     | 2                            | 2                            | 3.04                      | RNase of the DEDD superfamily, subunit of the Ccr4-Not complex that mediates 3' to 5' mRNA deadenylation                                                                                                                                                     | transcription factor (putative)                                                                       | 3'-5'-exonuclease activity                                  | regulation of transcription from Pol II promoter* | cytoplasm*                         | 5             | 5            | SD                         |
| YDL160C | <i>DHH1</i>       | RNA processing                | D                        | 3                    | 2                     | 2                   | 3                            | 2                            | 1.46                      | Cytoplasmic DEXD/H-box helicase, stimulates mRNA decapping, coordinates distinct steps in mRNA function and decay, interacts with both the decapping and deadenylase complexes, may have a role in mRNA export and translation                               | 0                                                                                                     | protein binding                                             | deadenylation-dependent decapping*                | cytoplasm*                         | 2             | 2            |                            |
| YGL173C | <i>KEM1</i>       | RNA processing                | D                        | 1                    | 3                     | 3                   | 2                            | 2                            | 2.28                      | 5'-3' exonuclease involved in mRNA decay, evolutionarily conserved component of cytoplasmic processing (P) bodies, plays a role in microtubule-mediated processes, filamentous growth, and ribosomal RNA maturation                                          | 5'-3' exonuclease                                                                                     | recombinase activity*                                       | 35S primary transcript processing*                | cytoplasm*                         | 2             | 1            |                            |
| YAL027W | 0                 | unknown                       | M                        | 3                    | 3                     | 3                   | 2                            | 2                            | 0.56                      | 0                                                                                                                                                                                                                                                            | 0                                                                                                     | 0                                                           | 0                                                 | 0                                  | 2             | 2            |                            |
| YDL118W | 0                 | unknown                       | M                        | 3                    | 3                     | 3                   | 3                            | 3                            | 1.64                      | 0                                                                                                                                                                                                                                                            | 0                                                                                                     | 0                                                           | 0                                                 | 0                                  | 1             | 2            |                            |

|           |        |                     |   |   |   |   |   |   |       |                                                                                                                                                                                                                                                             |                                                                                                     |                                        |                                           |                                                   |                            |               |   |   |
|-----------|--------|---------------------|---|---|---|---|---|---|-------|-------------------------------------------------------------------------------------------------------------------------------------------------------------------------------------------------------------------------------------------------------------|-----------------------------------------------------------------------------------------------------|----------------------------------------|-------------------------------------------|---------------------------------------------------|----------------------------|---------------|---|---|
| YDR067C   |        | unknown             | M | 3 | 3 | 3 | 3 | 3 | 0.79  | 0                                                                                                                                                                                                                                                           |                                                                                                     | 0                                      | 0                                         | 0                                                 | 0                          | 2             | 2 |   |
| YDR493W   | FMP36  | unknown             | M | 3 | 3 | 3 | 3 | 3 | 0.49  | The authentic, non-tagged protein was localized to the mitochondria                                                                                                                                                                                         |                                                                                                     | molecular_function                     | unknown                                   | biological_process                                | unknown                    | mitochondrion | 2 | 2 |
| YFR012W   |        | unknown             | M | 3 | 3 | 3 | 3 | 3 | 0.47  | 0                                                                                                                                                                                                                                                           |                                                                                                     | 0                                      | 0                                         | 0                                                 | 0                          | 2             | 2 |   |
| YGL057C   |        | unknown             | M | 3 | 3 | 3 | 3 | 3 | 0.44  | 0                                                                                                                                                                                                                                                           |                                                                                                     | 0                                      | 0                                         | 0                                                 | 0                          | 2             | 2 |   |
| YIL090W   |        | unknown             | N | 3 | 3 | 3 | 3 | 3 | 1.74  | 0                                                                                                                                                                                                                                                           |                                                                                                     | 0                                      | 0                                         | 0                                                 | 0                          | 4             | 4 |   |
| YJR120W   |        | unknown             | N | 2 | 3 | 3 | 3 | 3 | 0.75  | 0                                                                                                                                                                                                                                                           |                                                                                                     | 0                                      | 0                                         | 0                                                 | 0                          | 2             | 2 |   |
| YLL044W   |        | unknown             | N | 3 | 3 | ? | 3 | 3 | 0.41  | 0                                                                                                                                                                                                                                                           |                                                                                                     | 0                                      | 0                                         | 0                                                 | 0                          | 5             | 4 |   |
| YNL224C   |        | unknown             | N | 3 | 3 | 3 | 3 | 3 | 0.52  | 0                                                                                                                                                                                                                                                           |                                                                                                     | 0                                      | 0                                         | 0                                                 | 0                          | 1             | 1 |   |
| YOL083W   |        | unknown             | N | 3 | 3 | 3 | 3 | 0 | 0.62* | 0                                                                                                                                                                                                                                                           |                                                                                                     | 0                                      | 0                                         | 0                                                 | 0                          | 2             | 2 |   |
| YMR116C   | ASC1   | translation         | C | 3 | 4 | 5 | 3 | 3 | 0.95  | WD repeat protein (G-beta like protein) that interacts with the translational machinery; G-beta like protein                                                                                                                                                |                                                                                                     | molecular_function                     | unknown                                   | biological_process                                | unknown                    | cytoplasm     | 1 | 1 |
| YFR009W   | GCN20  | translation         | C | 3 | 3 | 3 | 3 | 3 | 0.67  | Positive regulator of the Gcn2p kinase activity, forms a complex with Gcn1p; proposed to stimulate Gcn2p activation by an uncharged tRNA                                                                                                                    | ATP-binding cassette (ABC) family                                                                   | molecular_function                     | unknown                                   | regulation of translational elongation            | cytosol*                   | 2             | 2 |   |
| YCL037C   | SRO9   | translation         | C | 3 | 3 | 4 | 0 | 3 | 0.56  | Associates with translating ribosomes; may function in the cytoplasm to modulate mRNA translation; may be involved in organization of actin filaments; RNA binding protein with La motif                                                                    |                                                                                                     | RNA binding                            | protein biosynthesis                      | polysome                                          | 5                          | 4             |   |   |
| YML073C   | RPL6A  | translation         | C | 3 | 2 | 2 | 2 | 2 | 0.25  | N-terminally acetylated protein component of the large (60S) ribosomal subunit, has similarity to Rpl6Bp and to rat L6 ribosomal protein; binds to 5.8S rRNA                                                                                                | ribosomal protein L6A (L17A) (p18) (YL16)                                                           | structural constituent of ribosome*    | protein biosynthesis*                     | cytosolic large ribosomal subunit (sensu Eukarya) | 2                          | 1             | S |   |
| YIL069C   | RPS24B | translation         | C | 3 | 3 | 4 | 3 | 3 | 0.85  | Protein component of the small (40S) ribosomal subunit; identical to Rps24Ap and has similarity to rat S24 ribosomal protein                                                                                                                                | ribosomal protein S24B                                                                              | structural constituent of ribosome     | protein biosynthesis                      | cytosolic small ribosomal subunit (sensu Eukarya) | 4                          | 5             |   |   |
| YPL125W   | KAP120 | nuclear transport   | A | 3 | 3 | 3 | 3 | 3 | 0.66  | Karyopherin with a role in the assembly or export of 60S ribosomal subunits                                                                                                                                                                                 | karyopherin                                                                                         | structural constituent of nuclear pore | protein-nucleus import                    | cytoplasm*                                        | 1                          | 1             |   |   |
| YDR432W   | NPL3   | nuclear transport   | A | 2 | 1 | 1 | 3 | 2 | 0.85  | RNA-binding protein that carries poly(A)+ mRNA from the nucleus into the cytoplasm; phosphorylation by Sky1p in the cytoplasm may promote release of mRNAs                                                                                                  | contains RNA recognition motif nuclear shuttling protein                                            | mRNA binding*                          | mRNA-nucleus export                       | cytoplasm*                                        | 4                          | 5             |   |   |
| YDR159W   | SAC3   | nuclear transport   | A | 2 | 1 | 1 | 2 | 2 | 4.49  | A component of the nuclear pore that is involved in the nuclear export of both mRNA and protein; Leucine permease transcriptional regulator                                                                                                                 |                                                                                                     | protein binding                        | mRNA-nucleus export*                      | nuclear pore                                      | 5                          | 5             |   |   |
| YKR082W   | NUP133 | nuclear transport   | B | 3 | 3 | 3 | 3 | 2 | 1.67  | Subunit of the Nup84p subcomplex of the nuclear pore complex (NPC), localizes to both sides of the NPC, required to establish a normal nucleocytoplasmic concentration gradient of the GTPase Gsp1p                                                         | nuclear pore complex subunit                                                                        | structural molecule activity           | mRNA-nucleus export*                      | nuclear pore                                      | 5                          | 4             | S |   |
| YDL116W   | NUP84  | nuclear transport   | B | 3 | 4 | 4 | 4 | 4 | 4.54  | Subunit of the nuclear pore complex (NPC), forms a subcomplex with Nup85p, Nup120p, Nup145p-C, Sec13p, and Seh1p that plays a role in nuclear mRNA export and NPC biogenesis                                                                                | nuclear pore complex subunit(similar to mammalian Nup107p)                                          | structural molecule activity           | mRNA-nucleus export*                      | nuclear pore                                      | 4                          | 4             | S |   |
| YKL057C   | NUP120 | nuclear transport   | B | 3 | 3 | 3 | 3 | 3 | 3.06  | Subunit of the Nup84p subcomplex of the nuclear pore complex (NPC), required for even distribution of NPCs around the nuclear envelope, involved in establishment of a normal nucleocytoplasmic concentration gradient of the GTPase Gsp1p                  | 100 kDa protein (predicted molecular weight is 120 kDa) with two leucine zipper motifs, coiled-coil | structural molecule activity           | mRNA-nucleus export*                      | nuclear pore                                      | 5                          | 5             |   |   |
| YDL088C   | ASM4   | nuclear transport   | B | 3 | 3 | 3 | 3 | 3 | 0.53  | Nuclear pore complex subunit, part of a subcomplex also containing Nup53p, Nup170p, and Pse1p                                                                                                                                                               | nuclear pore complex subunit                                                                        | structural molecule activity           | mRNA-nucleus export*                      | nuclear pore                                      | 1                          | 1             |   |   |
| YKL068W   | NUP100 | nuclear transport   | B | 3 | 4 | 4 | 3 | 3 | 0.51  | Subunit of the nuclear pore complex (NPC) that is localized to both sides of the pore; contains a repetitive GLFG motif that interacts with mRNA export factor Mex67p and with karyopherin Kap95p; homologous to Nup116p                                    | nuclear pore complex subunit                                                                        | structural molecule activity           | mRNA-nucleus export*                      | nuclear pore                                      | 4                          | 4             |   |   |
| YDR289C   | RTT103 | Ty1 related         | I | 3 | 1 | 1 | 3 | 3 | 0.58  | Regulator of Ty1 Transposition; regulator of Ty1 Transposition                                                                                                                                                                                              |                                                                                                     | molecular_function                     | unknown                                   | negative regulation of DNA transposition          | cellular_component unknown | 5             | 5 | J |
| YLL002W   | RTT109 | Ty1 related         | I | 3 | 3 | 3 | 3 | 3 | 3.35  | Regulator of Ty1 Transposition; Regulation of mitochondrial network; Killed in Mutagen, sensitive to diisopropylamine and/or mitomycin C; diisopropylamine and mitomycin C resistance                                                                       |                                                                                                     | molecular_function                     | unknown                                   | negative regulation of DNA transposition          | nucleus                    | 5             | 4 | J |
| YER173W   | RAD24  | DNA maintenance     | I | 3 | 3 | 2 | 3 | 3 | 0.68  | Checkpoint protein, involved in the activation of the DNA damage and meiotic pachytene checkpoints; subunit of a clamp loader that loads Rad17p-Mec3p-Ddc1p onto DNA; homolog of human and S. pombe Rad17 protein                                           | cell cycle exonuclease (putative)                                                                   | DNA clamp loader activity              | meiotic recombination*                    | nucleus*                                          | 2                          | 2             |   |   |
| YOR144C   | ELG1   | DNA maintenance     | I | 3 | 4 | 4 | 3 | 3 | 1.68  | Protein required for S phase progression and telomere homeostasis, forms an alternative replication factor C complex important for DNA replication and genome integrity; mutants are sensitive to DNA damage                                                |                                                                                                     | molecular_function                     | unknown                                   | DNA replication*                                  | cytoplasm*                 | 4             | 4 | J |
| YCL061C   | MRC1   | DNA maintenance     | I | 3 | 3 | 3 | 3 | 3 | 1.41  | S-phase checkpoint protein found at replication forks, required for DNA replication; also required for Rad53p activation during DNA replication stress, where it forms a replication-pausing complex with TopBP1 and is phosphorylated by Mec1p; protein in |                                                                                                     | molecular_function                     | unknown                                   | chromatin silencing at telomere*                  | nucleus*                   | 4             | 4 |   |
| YGL058W   | RAD6   | DNA maintenance     | J | 3 | 3 | 3 | 3 | 3 | 0.84  | Ubiquitin-conjugating enzyme (E2), involved in postreplication repair (with Rad18p), sporulation, telomere silencing, and ubiquitin-mediated N-end rule protein degradation (with Ubr1p)                                                                    | ubiquitin-conjugating enzyme                                                                        | ubiquitin conjugating enzyme activity  | ubiquitin-dependent protein catabolism*   | cytoplasm*                                        | 5                          | 5             |   |   |
| YJL092W   | HPR5   | DNA maintenance     | J | 2 | 4 | 4 | 3 | 3 | 0.85  | DNA helicase and DNA-dependent ATPase involved in DNA repair, required for proper timing of commitment to meiotic recombination and the transition from Meiosis I to Meiosis II; potential Cdc28p substrate                                                 | DNA helicase                                                                                        | DNA helicase activity                  | DNA repair*                               | nucleus                                           | 4                          | 4             |   |   |
| YMR190C   | SGS1   | DNA maintenance     | J | 2 | 4 | 4 | 3 | 3 | 0.84  | Nucleolar DNA helicase of the RecQ family, involved in maintenance of genome integrity; has similarity to human BLM and WRN helicases implicated in Bloom and Werner syndromes                                                                              |                                                                                                     | ATP-dependent DNA helicase activity    | mitotic sister chromatid segregation*     | nucleolus                                         | 5                          | 4             | J |   |
| YMR048W   | CSM3   | DNA maintenance     | J | 2 | 4 | 4 | 3 | 3 | 0.57  | Protein required for accurate chromosome segregation during meiosis                                                                                                                                                                                         |                                                                                                     | molecular_function                     | unknown                                   | DNA replication checkpoint*                       | nucleus                    | 4             | 4 |   |
| YIL009C-A | EST3   | DNA maintenance     | J | 2 | 4 | 4 | 3 | 3 | 1.44  | Component of the telomerase holoenzyme, involved in telomere replication                                                                                                                                                                                    | 20.5 kDa 181aa protein                                                                              | telomerase activity                    | telomerase-dependent telomere maintenance | nucleus*                                          | 5                          | 4             |   |   |
| YHR031C   | RRM3   | DNA maintenance     | J | 3 | 3 | 3 | 3 | 3 | 3.48  | involved in rDNA replication and Ty1 transposition; DNA helicase                                                                                                                                                                                            | DNA helicase                                                                                        | DNA helicase activity*                 | DNA replication                           | nuclear telomeric heterochromatin                 | 5                          | 5             | J |   |
| YBR021W   | FUR4   | cell wall, membrane |   |   |   |   |   |   |       | Uracil permease, localized to the plasma membrane; expression is tightly regulated by uracil levels and environmental cues                                                                                                                                  | uracil permease                                                                                     | uracil permease activity               | uracil transport                          | plasma membrane                                   | 1                          | 1             |   |   |
| YER145C   | FTR1   | cell wall, membrane |   |   |   |   |   |   |       | High affinity iron permease involved in the transport of iron across the plasma membrane; forms complex with Fet3p; expression is regulated by iron                                                                                                         | iron permease                                                                                       | iron ion transporter activity          | high affinity iron ion transport          | plasma membrane                                   | 2                          | 2             |   |   |

|           |       |                               |                                                                                                                                                                                                                                              |                                                                                                     |                                                                   |                                                         |                                                         |   |   |    |
|-----------|-------|-------------------------------|----------------------------------------------------------------------------------------------------------------------------------------------------------------------------------------------------------------------------------------------|-----------------------------------------------------------------------------------------------------|-------------------------------------------------------------------|---------------------------------------------------------|---------------------------------------------------------|---|---|----|
| YMR058W   | FET3  | cell wall, membrane           | Ferro-O2-oxidoreductase required for high-affinity iron uptake and involved in mediating resistance to copper ion toxicity, belongs to class of integral membrane multicopper oxidases                                                       | multicopper oxidase                                                                                 | ferroxidase activity                                              | high affinity iron ion transport*                       | plasma membrane                                         | 2 | 2 |    |
| YMR123W   | PKR1  | cell wall, membrane           | Pichia farinosa Killer toxin Resistance; Pichia farinosa killer toxin resistance                                                                                                                                                             | 0                                                                                                   | molecular_function unknown                                        | biological_process unknown                              | endoplasmic reticulum                                   | 2 | 2 |    |
| YBL006C   | LDB7  | cell wall, membrane           | Protein of unknown function; null mutant shows a reduced affinity for the alcian blue dye suggesting a decreased net negative charge of the cell surface                                                                                     | 0                                                                                                   | molecular_function unknown                                        | cell wall mannoprotein biosynthesis                     | cellular_component nt unknown                           | 5 | 5 |    |
| YHL030W   | ECM29 | cell wall, membrane           | Major component of the proteasome; tethers the proteasome core particle to the regulatory particle, and enhances the stability of the proteasome                                                                                             | 0                                                                                                   | protein binding                                                   | protein catabolism                                      | cytoplasm*                                              | 5 | 4 |    |
| YIL011W   | TIR3  | cell wall, membrane           | TIP1-related                                                                                                                                                                                                                                 | cell wall mannoprotein                                                                              | molecular_function unknown                                        | biological_process unknown                              | cell wall (sensu Fungi)                                 | 4 | 5 |    |
| YER155C   | BEM2  | cytoskeleton                  | Rho GTPase activating protein (RhoGAP) involved in the control of cytoskeleton organization and cellular morphogenesis; required for bud emergence                                                                                           | rho GTPase activating protein (GAP)                                                                 | signal transducer activity*                                       | cell wall organization and biogenesis*                  | intracellular                                           | 4 | 4 |    |
| YGL174W   | BUD13 | cytoskeleton                  | Protein involved in bud-site selection; diploid mutants display a unipolar budding pattern instead of the wild-type bipolar pattern                                                                                                          | 0                                                                                                   | molecular_function unknown                                        | bud site selection                                      | nucleus                                                 | 4 | 4 |    |
| YNL138W   | SRV2  | cytoskeleton                  | Adenylyl cyclase-associated protein; N-terminal domain appears to be involved in cellular responsiveness to RAS                                                                                                                              | 70 kDa adenylyl cyclase-associated protein                                                          | cytoskeletal protein binding*                                     | cytoskeleton organization and biogenesis*               | actin cortical patch (sensu Fungi)                      | 5 | 5 |    |
| YGR188C   | BUB1  | cytoskeleton                  | checkpoint gene involved in permitting entry into mitosis depending upon the assembly state of microtubules; Serine/threonine protein kinase required for cell cycle arrest in response to loss of microtubule function                      | 0                                                                                                   | protein binding*                                                  | protein amino acid phosphorylation*                     | nucleus*                                                | 2 | 2 |    |
| YPL256C   | CLN2  | DNA maintenance               | role in cell cycle START; G(sub)1 cyclin                                                                                                                                                                                                     | G1 cyclin                                                                                           | cyclin-dependent protein kinase regulator activity                | regulation of cyclin dependent protein kinase activity* | cytoplasm*                                              | 4 | 4 |    |
| YPR119W   | CLB2  | DNA maintenance               | Involved in mitotic induction; G(sub)2-specific B-type cyclin                                                                                                                                                                                | B-type cyclin                                                                                       | cyclin-dependent protein kinase regulator activity                | G2/M transition of mitotic cell cycle*                  | cytoplasm*                                              | 4 | 4 |    |
| YBR044C   | TCM62 | mitochondrial related         | mitochondrial protein; (putative) chaperone                                                                                                                                                                                                  | chaperone (putative)                                                                                | unfolded protein binding                                          | protein complex assembly                                | mitochondrial inner membrane                            | 2 | 2 |    |
| YHR008C   | SOD2  | mitochondrial related         | Manganese-containing superoxide dismutase                                                                                                                                                                                                    | Mn-containing superoxide dismutase                                                                  | manganese superoxide dismutase activity                           | oxygen and reactive oxygen species metabolism           | mitochondrion*                                          | 2 | 2 |    |
| YIL134W   | FLX1  | mitochondrial related         | Protein required for transport of flavin adenine dinucleotide (FAD) from mitochondria, where it is synthesized from riboflavin, to the cytosol                                                                                               | FAD carrier protein                                                                                 | flavin-adenine dinucleotide transporter activity                  | flavin-adenine dinucleotide transport                   | mitochondrion                                           | 2 | 2 |    |
| YIR021W   | MRS1  | mitochondrial related         | Protein required for the splicing of two mitochondrial group I introns (B13 in COB and A15beta in COX1); forms a splicing complex, containing four subunits of Mrs1p and two subunits of the B13-encoded maturase, that binds to the B13 RNA | 0                                                                                                   | RNA binding*                                                      | Group I intron splicing                                 | mitochondrion                                           | 4 | 4 |    |
| YJR121W   | ATP2  | mitochondrial related         | Beta subunit of the F1 sector of mitochondrial F1FO ATP synthase, which is a large, evolutionarily conserved enzyme complex required for ATP synthesis                                                                                       | F(1)F(0)-ATPase complex beta subunit                                                                | hydrogen-transporting ATP synthase activity, rotational mechanism | ATP synthesis coupled proton transport*                 | soluble fraction*                                       | 2 | 2 |    |
| YML081C-A | ATP18 | mitochondrial related         | Subunit of the mitochondrial F1FO ATP synthase, which is a large enzyme complex required for ATP synthesis; termed subunit I or subunit j; does not correspond to known ATP synthase subunits in other organisms                             | ATP synthase associated protein                                                                     | hydrogen-transporting ATP synthase activity, rotational mechanism | ATP synthesis coupled proton transport                  | proton-transporting ATP synthase complex, mitochondrion | 2 | 2 |    |
| YBR269C   | FMP21 | mitochondrial related         | The authentic, non-tagged protein was localized to the mitochondria                                                                                                                                                                          | 0                                                                                                   | molecular_function unknown                                        | biological_process unknown                              |                                                         | 4 | 4 |    |
| YER057C   | HMF1  | stress/chaperone/modification | Member of the p14.5 protein family with similarity to Mmf1p, functionally complements Mmf1p function when targeted to mitochondria; heat shock inducible; high-dosage growth inhibitor; forms a homotrimer in vitro                          | 0                                                                                                   | molecular_function unknown                                        | biological_process unknown                              | cytoplasm*                                              | 4 | 4 |    |
| YDR074W   | TPS2  | stress/chaperone/modification | Trehalose-6-phosphate phosphatase                                                                                                                                                                                                            | trehalose-6-phosphate phosphatase                                                                   | trehalose-phosphatase activity                                    | response to stress*                                     | alpha,alpha-trehalose-phosphate                         | 4 | 4 | SD |
| YAL013W   | DEP1  | metabolic                     | Transcriptional modulator involved in the regulation of structural genes involved in phospholipid biosynthesis, also participates in regulation of metabolically unrelated genes as well as maintenance of mating efficiency and sporulation | 0                                                                                                   | molecular_function unknown                                        | regulation of transcription from Pol II promoter*       | cellular_component nt unknown                           | 2 | 2 | SD |
| YHL003C   | LAG1  | metabolic                     | Ceramide synthase component, involved in synthesis of ceramide from C26(acyl)-coenzyme A and dihydrosphingosine or phytosphingosine, functionally equivalent to Lac1p                                                                        | 0                                                                                                   | sphingosine N-acyltransferase activity                            | replicative cell aging*                                 | endoplasmic reticulum                                   | 4 | 5 |    |
| YLR242C   | ARV1  | metabolic                     | Protein with similarity to Nup120p and C.elegans R05H5.5 protein                                                                                                                                                                             | Protein involved in sterol distribution                                                             | molecular_function unknown                                        | sterol transport*                                       | endoplasmic reticulum*                                  | 1 | 1 |    |
| YER060W-A | FCY22 | metabolic                     | Putative purine-cytosine permease, very similar to Fcy2p but cannot substitute for its function                                                                                                                                              | purine-cytosine permease                                                                            | cytosine-purine permease activity                                 | biological_process unknown                              | integral to membrane                                    | 4 | 4 |    |
| YDL074C   | BRE1  | DNA maintenance               | E3 ubiquitin ligase for Rad6p, required for the ubiquitination of histone H2B, recruitment of Rad6p to promoter chromatin and subsequent methylation of histone H3 (on L4 and L79), contains RING finger domain                              | 0                                                                                                   | ubiquitin-protein ligase activity                                 | chromatin silencing at telomere*                        | nucleus                                                 | 4 | 4 |    |
| YIL015W   | BAR1  | other                         | Aspartyl protease secreted into the periplasmic space of mating type a cells, cleaves and inactivates alpha factor allowing cells to recover from alpha-factor-induced cell cycle arrest                                                     | protease[synthesized in a-cells; cleaves and inactivates alpha factor                               | aspartic-type endopeptidase activity                              | protein catabolism                                      | periplasmic space (sensu Fungi)                         | 5 | 5 |    |
| YIL073C   | SPQ22 | metabolic                     | Meiosis-specific protein with similarity to phospholipase A2, involved in completion of nuclear divisions during meiosis; induced early in meiosis                                                                                           | meiosis-specific phospholipase A2 homolog                                                           | molecular_function unknown                                        | meiosis                                                 | cellular_component nt unknown                           | 2 | 1 |    |
| YKL149C   | DBR1  | RNA processing                | RNA lariat debranching enzyme, involved in intron turnover; required for efficient Ty1 transposition                                                                                                                                         | RNA lariat debranching enzyme                                                                       | RNA lariat debranching enzyme activity                            | RNA catabolism*                                         | nucleus                                                 | 1 | 2 | SD |
| YKL135C   | APL2  | trafficking                   | Beta-adaptin, large subunit of the clathrin-associated protein (AP-1) complex                                                                                                                                                                | beta-adaptin[clathrin associated protein complex large subunit                                      | clathrin binding                                                  | vesicle-mediated transport                              | AP-1 adaptor complex                                    | 5 | 5 |    |
| YEL004W   | YE44  | trafficking                   | Shows sequence similarity to GOG5, a gene involved in vanadate resistance; similar to Gog5, which is involved in vanadate resistance                                                                                                         | 0                                                                                                   | UDP-N-acetylglucosamine transporter activity                      | cell wall chitin biosynthesis*                          | endoplasmic reticulum                                   | 4 | 4 |    |
| YGR270W   | YTA7  | trafficking                   | Protein of unknown function, member of CDC48/PAS1/SEC18 family of ATPases, potentially phosphorylated by Cdc28p                                                                                                                              | 0                                                                                                   | ATPase activity                                                   | protein catabolism                                      | nucleus                                                 | 4 | 4 |    |
| YNL242W   | ATG2  | trafficking                   | Defective in autophagy; required for sporulation; Required for sporulation.                                                                                                                                                                  | peripheral membrane protein                                                                         | molecular_function unknown                                        | protein-vacuolar targeting*                             | extrinsic to membrane                                   | 4 | 4 |    |
| YKL041W   | VPS24 | trafficking                   | involved in secretion                                                                                                                                                                                                                        | 0                                                                                                   | molecular_function unknown                                        | late endosome to vacuole transport                      | cytoplasm*                                              | 4 | 4 |    |
| YMR154C   | RIM13 | trafficking                   | Regulator of IME2 (RIM); Cysteine protease similar to E. nidulans palB                                                                                                                                                                       | calpain-like protease involved in proteolytic processing of Rim1p/Rim101p[cysteine protease]similar | cysteine-type endopeptidase activity                              | protein processing                                      | cellular_component nt unknown                           | 2 | 2 | MA |
| YKR020W   | VPS51 | trafficking                   | whiskey (whi) mutant; forms a tetramer with VPS52, VPS53, and VPS54                                                                                                                                                                          | protein binding                                                                                     | protein-vacuolar targeting                                        | Golgi apparatus                                         |                                                         | 1 | 2 |    |

|           |              |                                          |                                                                                                                                                                                                                                                                                                                                                         |                                                                                                          |                                                          |                                             |                              |   |   |       |
|-----------|--------------|------------------------------------------|---------------------------------------------------------------------------------------------------------------------------------------------------------------------------------------------------------------------------------------------------------------------------------------------------------------------------------------------------------|----------------------------------------------------------------------------------------------------------|----------------------------------------------------------|---------------------------------------------|------------------------------|---|---|-------|
| YDR290W   | 0            | unknown                                  |                                                                                                                                                                                                                                                                                                                                                         | Sick Without Securin; HU sensitive mutant; name reserved Orna Cohen-Fix; overlaps 42% with <i>RTT103</i> | 0                                                        | 0                                           | 0                            | 5 | 5 |       |
| YBL094C   | 0            | unknown                                  |                                                                                                                                                                                                                                                                                                                                                         |                                                                                                          | 0                                                        | 0                                           | 0                            | 4 | 4 |       |
| YBR277C   | 0            | unknown                                  |                                                                                                                                                                                                                                                                                                                                                         |                                                                                                          | 0                                                        | 0                                           | 0                            | 4 | 4 |       |
| YBR284W   | 0            | unknown                                  |                                                                                                                                                                                                                                                                                                                                                         |                                                                                                          | 0                                                        | 0                                           | 0                            | 4 | 4 | MA    |
| YHR177W   | 0            | unknown                                  |                                                                                                                                                                                                                                                                                                                                                         |                                                                                                          | 0                                                        | 0                                           | 0                            | 4 | 4 |       |
| YLL030C   | 0            | unknown                                  |                                                                                                                                                                                                                                                                                                                                                         |                                                                                                          | 0                                                        | 0                                           | 0                            | 5 | 4 |       |
| YLR235C   | 0            | unknown                                  |                                                                                                                                                                                                                                                                                                                                                         |                                                                                                          | 0                                                        | 0                                           | 0                            | 5 | 4 |       |
| YMR158W-B | 0            | unknown                                  |                                                                                                                                                                                                                                                                                                                                                         |                                                                                                          | 0                                                        | 0                                           | 0                            | 2 | 2 |       |
| YPL225W   | 0            | unknown                                  |                                                                                                                                                                                                                                                                                                                                                         |                                                                                                          | 0                                                        | 0                                           | 0                            | 2 | 2 |       |
| YDR176W   | <i>HGG1</i>  | chromatin modification and transcription | Involved in glucose repression of GAL4p-regulated transcription; transcription factor; genetic and mutant analyses suggest that Ngg1p (Ada3p) is part of two transcriptional adaptor/HAT (histone acetyltransferase complexes, the 0.8 MD ADA complex and Protein that associates with the INO80 chromatin remodeling complex under low-salt conditions | Ngg1p (Ada3p) is part of two transcriptional adaptor/HAT (h                                              | transcription cofactor activity histone acetylation*     | SAGA complex*                               | 4                            | 4 |   |       |
| YEL044W   | <i>IES6</i>  | chromatin modification and transcription |                                                                                                                                                                                                                                                                                                                                                         | 0                                                                                                        | molecular_function unknown metabolism                    | nucleus                                     | 1                            | 2 |   |       |
| YGL066W   | <i>SGF73</i> | chromatin modification and transcription | SaGa associated Factor 73kDa; Probable 73KDa Subunit of SAGA histone acetyltransferase complex                                                                                                                                                                                                                                                          | Probable 73KDa Subunit of SAGA histone acetyltransferase complex                                         | molecular_function unknown histone acetylation           | SAGA complex                                | 5                            | 4 |   |       |
| YGR056W   | <i>RSC1</i>  | chromatin modification and transcription | RSC1 is a member of RSC complex, which remodels the structure of chromatin; Member of RSC complex                                                                                                                                                                                                                                                       | RSC complex member                                                                                       | molecular_function unknown chromatin remodeling          | nucleosome remodeling complex nucleus       | 5                            | 4 |   |       |
| YJL006C   | <i>CTK2</i>  | chromatin modification and transcription | Beta subunit of C-terminal domain kinase I (CTDK-I), which phosphorylates the C-terminal repeated domain of the RNA polymerase II large subunit (Rpo21p) to affect both transcription and pre-mRNA 3' end processing; has similarity to cyclins                                                                                                         | RNA polymerase II C-terminal domain kinase beta subunit, similar to cyclin                               | cyclin-dependent protein kinase regulator activity       | protein amino acid phosphorylation*         | 1                            | 2 |   |       |
| YLR015W   | <i>BRE2</i>  | chromatin modification and transcription | Subunit of the COMPASS complex, which methylates histone H3 on lysine 4 and is required in transcriptional silencing near telomeres; has similarity to ASH2L member of trithorax proteins                                                                                                                                                               | compass (complex proteins associated with Set1p) component                                               | chromatin binding*                                       | chromatin silencing at telomere*            | 5                            | 4 |   |       |
| YNL236W   | <i>SIN4</i>  | chromatin modification and transcription | Involved in positive and negative regulation of transcription, possibly via changes in chromatin structure; regulation of YGP1 expression; component of RNA polymerase II holoenzyme/mediator complex                                                                                                                                                   | RNA polymerase II holoenzyme/mediator subunit                                                            | RNA polymerase II transcription mediator activity        | transcription from Pol II promoter          | mediator complex             | 1 | 2 | SD MA |
| YPL042C   | <i>SSN3</i>  | chromatin modification and transcription | Component of RNA polymerase II holoenzyme, involved in RNA pol II carboxy-terminal domain phosphorylation                                                                                                                                                                                                                                               | cyclin (SSN8)-dependent serine/threonine protein kinase                                                  | general RNA polymerase II transcription factor activity* | protein amino acid phosphorylation*         | transcription factor complex | 1 | 1 |       |
| YNL136W   | <i>EAF7</i>  | chromatin modification and transcription | Subunit of the NuA4 histone acetyltransferase complex                                                                                                                                                                                                                                                                                                   | 0                                                                                                        | molecular_function unknown biological_process unknown    | nucleus                                     | 2                            | 1 |   |       |
| YOR039W   | <i>CKB2</i>  | chromatin modification and transcription | protein kinase CK2, beta' subunit                                                                                                                                                                                                                                                                                                                       | protein kinase CK2, beta' subunit                                                                        | protein kinase CK2 activity                              | protein amino acid phosphorylation*         | protein kinase CK2 complex   | 5 | 4 |       |
| YCR020W-B | <i>HTL1</i>  | chromatin modification and transcription | High-Temperature Lethal; high-temperature lethal                                                                                                                                                                                                                                                                                                        | 0                                                                                                        | molecular_function unknown regulation of cell cycle*     | RSC complex                                 | 4                            | 4 |   |       |
| YDL056W   | <i>MBP1</i>  | chromatin modification and transcription | transcription factor                                                                                                                                                                                                                                                                                                                                    | transcription factor                                                                                     | DNA binding*                                             | regulation of cell cycle*                   | nucleus                      | 4 | 4 |       |
| YDR448W   | <i>ADA2</i>  | chromatin modification and transcription | transcription factor, member of ADA and SAGA, two transcriptional adaptor/HAT (histone acetyltransferase)complexes                                                                                                                                                                                                                                      | transcription factor                                                                                     | transcription coactivator activity                       | histone acetylation*                        | SAGA complex*                | 4 | 5 |       |
| YKR099W   | <i>BAS1</i>  | chromatin modification and transcription | Myb-related transcription factor involved in regulating basal and induced expression of genes of the purine and histidine biosynthesis pathways                                                                                                                                                                                                         | transcription factor                                                                                     | RNA polymerase II transcription factor activity          | transcription from Pol II promoter*         | nucleus                      | 2 | 2 |       |
| YLR399C   | <i>BDF1</i>  | chromatin modification and transcription | Protein involved in transcription initiation at TATA-containing promoters; associates with the basal transcription factor TFIID; contains two bromodomains; corresponds to the C-terminal region of mammalian TAF11; redundant with Bdf2p                                                                                                               | 0                                                                                                        | transcription regulator activity                         | chromatin remodeling*                       | nucleus                      | 4 | 5 |       |
| YML051W   | <i>GAL80</i> | chromatin modification and transcription | Transcriptional regulator involved in the repression of GAL genes in the absence of galactose; inhibits transcriptional activation by Gal4p; inhibition relieved by Gal3p or Gal1p binding                                                                                                                                                              | transcriptional regulator                                                                                | transcription corepressor activity                       | regulation of transcription, DNA-dependent* | cytoplasm*                   | 5 | 5 |       |
| YPL024W   | <i>NCE4</i>  | chromatin modification and transcription | involved in cell separation                                                                                                                                                                                                                                                                                                                             | 0                                                                                                        | molecular_function unknown biological_process unknown    | cytoplasm*                                  | 4                            | 5 |   |       |
| YAR003W   | <i>SWD1</i>  | chromatin modification and transcription | Subunit of the COMPASS complex, which methylates histone H3 on lysine 4 and is required in transcriptional silencing near telomeres                                                                                                                                                                                                                     | compass (complex proteins associated with Set1p) component                                               | transcriptional activator activity*                      | chromatin silencing at telomere*            | nuclear chromatin*           | 4 | 4 | MA    |

<sup>1</sup>Mutants presented in the Westerns and Southern of Sup. Fig. 1 are in the order indicated here. This was not the order in the original gels which have been repositioned here in order to better compare mutants with related functions. The original blots are available upon request.

<sup>2</sup>Ratio of CA:Gag3 visually estimated in order to identify strong processing phenotypes based on Westerns in Sup. Fig. 1; 3=wt

<sup>3</sup>Amt of CA/IN relative to wt based on PGK signal in the same sample; 3=wt

<sup>4</sup>Sample loading was compared by ethidium staining of genomic DNA. These scores are based on visual comparison between amt of plasmid in mutant transformant to amt in wt sample on the same Southern.

<sup>5</sup>Ratio of cDNA:plasmid was determined by scanning both transformants, averaging the cDNA:plasmid intensity ratio and comparing it to the wt ratio. The wt ratio was determined by averaging the ratio of eight independent transformants. The average was 0.57 and the Std.Dev. was 0.31. Mutants were considered to have high or low cDNA if they differed by more than one Std.Dev.

<sup>6</sup>Database information on genes was downloaded from SGD and accessed using GOnet as described in Materials and Methods.

<sup>7</sup>Other screens are: Ty1, Scholes et al. (JC) (Scholes et al. 2001); Ty1, Griffith et al. (SD)(Griffith et al. 2003); and Ty3, Aye et al. (MA)(Aye et al. 2004).

**Sup. Table 4. Human homologs of yeast mutants (Table 1 genes only)**

| <b>Yeast ORF</b> | <b>Yeast Gene</b> | <b>Human Gene<sup>1</sup></b>                             | <b>BLAST <i>p</i> value<sup>2</sup></b> |
|------------------|-------------------|-----------------------------------------------------------|-----------------------------------------|
| YGL173C          | <i>KEM1</i>       | 5'-3' exoribonuclease 1 [Homo sapiens]                    | 0                                       |
| YJR121W          | <i>ATP2</i>       | ATP synthase, H <sup>+</sup> transporting, mitochondri... | 0                                       |
| YMR190C          | <i>SGS1</i>       | Bloom syndrome protein [Homo sapiens]                     | 1.00E-115                               |
| YKL135C          | <i>APL2</i>       | adaptor-related protein complex 2, beta 1 ...             | 1.00E-126                               |
| YGR270W          | <i>YTA7</i>       | two AAA domain containing protein [Homo sa...             | 1.00E-134                               |
| YPR173C          | <i>VPS4</i>       | vacuolar protein sorting factor 4B [Homo s...             | 1.00E-146                               |
| YFR009W          | <i>GCN20</i>      | ATP-binding cassette, sub-family F (GCN20)...             | 1.00E-157                               |
| YDL160C          | <i>DHH1</i>       | DEAD (Asp-Glu-Ala-Asp) box polypeptide 6 [...             | 1.00E-162                               |
| YOR270C          | <i>VPH1</i>       | ATPase, H <sup>+</sup> transporting, lysosomal V0 subu... | 1.00E-177                               |
| YHL030W          | <i>ECM29</i>      | PREDICTED: KIAA0368 protein [Homo sapiens]                | 5.00E-97                                |
| YMR116C          | <i>ASC1</i>       | guanine nucleotide binding protein (G prot...             | 8.00E-96                                |
| YPL125W          | <i>KAP120</i>     | Ran binding protein 11 [Homo sapiens]                     | 7.00E-85                                |
| YGL078C          | <i>DBP3</i>       | DEAD box polypeptide 17 isoform p82 [Homo ...             | 1.00E-84                                |
| YFR019W          | <i>FAB1</i>       | phosphatidylinositol-3-phosphate/phosphati...             | 5.00E-78                                |
| YNL138W          | <i>SRV2</i>       | adenylyl cyclase-associated protein 2 [Hom...             | 1.00E-74                                |
| YKL149C          | <i>DBR1</i>       | debranching enzyme homolog 1 [Homo sapiens]               | 8.00E-68                                |
| YFL001W          | <i>DEG1</i>       | pseudouridylate synthase 3 [Homo sapiens]                 | 1.00E-67                                |
| YPL042C          | <i>SSN3</i>       | cyclin-dependent kinase 8 [Homo sapiens]                  | 2.00E-67                                |
| YBR284W          | <i>YBR284W</i>    | adenosine monophosphate deaminase 2 (isofo...             | 8.00E-62                                |
| YGL058W          | <i>RAD6</i>       | ubiquitin-conjugating enzyme E2A isoform 1...             | 1.00E-61                                |

|         |                |                                               |          |
|---------|----------------|-----------------------------------------------|----------|
| YKL068W | <i>NUP100</i>  | nucleoporin 98kD isoform 3 [Homo sapiens]     | 6.00E-56 |
| YPR119W | <i>CLB2</i>    | cyclin B2 [Homo sapiens]                      | 1.00E-53 |
| YOR039W | <i>CKB2</i>    | casein kinase 2, beta polypeptide [Homo sa... | 8.00E-53 |
| YDR448W | <i>ADA2</i>    | transcriptional adaptor 2-like isoform a [... | 1.00E-51 |
| YNR052C | <i>POP2</i>    | CCR4-NOT transcription complex, subunit 8 ... | 1.00E-50 |
| YHR008C | <i>SOD2</i>    | superoxide dismutase 2, mitochondrial [Hom... | 3.00E-48 |
| YOR275C | <i>RIM20</i>   | programmed cell death 6 interacting protei... | 1.00E-45 |
| YJR032W | <i>CPR7</i>    | peptidylprolyl isomerase D [Homo sapiens]     | 4.00E-43 |
| YGR188C | <i>BUB1</i>    | BUB1 budding uninhibited by benzimidazoles... | 1.00E-41 |
| YEL004W | <i>YEA4</i>    | solute carrier family 35, member B4 [Homo ... | 1.00E-40 |
| YNL059C | <i>ARP5</i>    | ARP5 actin-related protein 5 homolog [Homo... | 1.00E-40 |
| YIL134W | <i>FLX1</i>    | mitochondrial folate transporter/carrier [... | 4.00E-40 |
| YPL084W | <i>BRO1</i>    | programmed cell death 6 interacting protei... | 6.00E-39 |
| YLR268W | <i>SEC22</i>   | vesicle trafficking protein sec22b [Homo s... | 9.00E-39 |
| YPL002C | <i>SNF8</i>    | EAP30 subunit of ELL complex [Homo sapiens]   | 1.00E-38 |
| YIL069C | <i>RPS24B</i>  | ribosomal protein S24 isoform c [Homo sapi... | 6.00E-38 |
| YLR399C | <i>BDF1</i>    | bromodomain-containing protein 4 isoform I... | 1.00E-37 |
| YDR159W | <i>SAC3</i>    | minichromosome maintenance protein 3 assoc... | 1.00E-35 |
| YML073C | <i>RPL6A</i>   | ribosomal protein L6 [Homo sapiens]           | 1.00E-35 |
| YLR025W | <i>SNF7</i>    | Snf7 homologue associated with Alix 2 [Hom... | 9.00E-33 |
| YDL074C | <i>BRE1</i>    | ring finger protein 20 [Homo sapiens]         | 1.00E-28 |
| YPL225W | <i>YPL225W</i> | chromosome X open reading frame 26 [Homo s... | 8.00E-27 |

|         |               |                                               |          |
|---------|---------------|-----------------------------------------------|----------|
| YPL065W | <i>VPS28</i>  | vacuolar protein sorting 28 isoform 1 [Hom... | 1.00E-26 |
| YNR006W | <i>VPS27</i>  | hepatocyte growth factor-regulated tyrosin... | 2.00E-26 |
| YGR056W | <i>RSC1</i>   | polybromo 1 [Homo sapiens]                    | 9.00E-26 |
| YIL015W | <i>BAR1</i>   | progastricsin (pepsinogen C) [Homo sapiens]   | 9.00E-26 |
| YML097C | <i>VPS9</i>   | RAB guanine nucleotide exchange factor (GE... | 2.00E-25 |
| YER155C | <i>BEM2</i>   | PREDICTED: Rho GTPase activating protein 2... | 4.00E-24 |
| YKL041W | <i>VPS24</i>  | vacuolar protein sorting 24 isoform 1 [Hom... | 5.00E-24 |
| YEL013W | <i>VAC8</i>   | armadillo repeat containing 3 [Homo sapiens]  | 3.00E-23 |
| YER057C | <i>HMF1</i>   | heat-responsive protein 12 [Homo sapiens]     | 5.00E-21 |
| YDR139C | <i>RUB1</i>   | neural precursor cell expressed, developme... | 8.00E-21 |
| YMR077C | <i>VPS20</i>  | hypothetical protein FLJ11749 [Homo sapiens]  | 2.00E-20 |
| YDR432W | <i>NPL3</i>   | heterogeneous nuclear ribonucleoprotein R ... | 5.00E-20 |
| YJR102C | <i>VPS25</i>  | hypothetical protein MGC10540 [Homo sapiens]  | 5.00E-20 |
| YKR099W | <i>BAS1</i>   | small nuclear RNA activating complex, poly... | 5.00E-19 |
| YIL011W | <i>TIR3</i>   | PREDICTED: chromosome 6 open reading frame... | 6.00E-19 |
| YHL003C | <i>LAG1</i>   | LAG1 longevity assurance homolog 2 isoform... | 6.00E-17 |
| YER173W | <i>RAD24</i>  | RAD17 homolog isoform 2 [Homo sapiens]        | 9.00E-17 |
| YDL116W | <i>NUP84</i>  | nuclear pore complex protein [Homo sapiens]   | 5.00E-16 |
| YNL242W | <i>ATG2</i>   | chromosome 14 open reading frame 103 [Homo... | 7.00E-16 |
| YCL061C | <i>MRC1</i>   | KIAA1212 [Homo sapiens]                       | 6.00E-15 |
| YDR323C | <i>PEP7</i>   | FYVE-finger-containing Rab5 effector prote... | 2.00E-14 |
| YDR289C | <i>RTT103</i> | chromosome 20 open reading frame 77 [Homo ... | 3.00E-14 |

|         |                |                                                |          |
|---------|----------------|------------------------------------------------|----------|
| YBR044C | <i>TCM62</i>   | chaperonin [Homo sapiens]                      | 1.00E-13 |
| YCL037C | <i>SRO9</i>    | FLJ10378 protein isoform 2 [Homo sapiens]      | 2.00E-12 |
| YNL136W | <i>YNL136W</i> | splicing factor, arginine/serine-rich 12 [...] | 3.00E-12 |
| YJL006C | <i>CTK2</i>    | cyclin K [Homo sapiens]                        | 2.00E-11 |
| YFL007W | <i>BLM3</i>    | proteasome (prosome, macropain) activator ...  | 1.00E-10 |
| YLR242C | <i>ARV1</i>    | ARV1 homolog [Homo sapiens]                    | 2.00E-10 |
| YMR154C | <i>RIM13</i>   | calpain 7 [Homo sapiens]                       | 4.00E-10 |
| YGL066W | <i>SGF73</i>   | forkhead box P2 isoform I [Homo sapiens]       | 1.00E-09 |
| YBL007C | <i>SLA1</i>    | mucin 17 [Homo sapiens]                        | 8.00E-09 |
| YEL044W | <i>IES6</i>    | chromosome 18 open reading frame 37 [Homo ...] | 6.00E-08 |
| YMR048W | <i>CSM3</i>    | timeless-interacting protein [Homo sapiens]    | 8.00E-08 |
| YGL174W | <i>BUD13</i>   | hypothetical protein MGC13125 [Homo sapiens]   | 9.00E-08 |
| YAL013W | <i>DEP1</i>    | Snf2-related CBP activator protein [Homo s...] | 1.00E-07 |
| YDL056W | <i>MBP1</i>    | death-associated protein kinase 1 [Homo sa...] | 1.00E-06 |
| YNL224C | <i>YNL224C</i> | angiogenic factor VG5Q [Homo sapiens]          | 2.00E-06 |
| YIL073C | <i>SPO22</i>   | testis expressed sequence 11 isoform 2 [Ho...] | 3.00E-06 |
| YDL088C | <i>ASM4</i>    | dentin sialophosphoprotein preproprotein [...] | 7.00E-06 |
| YJL047C | <i>RTT101</i>  | cullin 2 [Homo sapiens]                        | 9.00E-06 |
| YLR423C | <i>ATG17</i>   | centromere protein E [Homo sapiens]            | 9.00E-06 |
| YOR144C | <i>ELG1</i>    | hypothetical protein FLJ12735 [Homo sapiens]   | 2.00E-05 |
| YPL256C | <i>CLN2</i>    | cyclin A [Homo sapiens]                        | 5.00E-05 |
| YGR167W | <i>CLC1</i>    | clathrin, light polypeptide A isoform a [H...] | 7.00E-05 |

|         |                |                                               |          |
|---------|----------------|-----------------------------------------------|----------|
| YGL212W | <i>VAM7</i>    | syntaxin 6 [Homo sapiens]                     | 9.00E-05 |
| YBR269C | <i>YBR269C</i> | chromosome 6 open reading frame 57 [Homo s... | 2.00E-04 |
| YDR176W | <i>NGG1</i>    | transcriptional adaptor 3-like isoform a [... | 3.00E-04 |
| YHR177W | <i>GON3</i>    | nuclear factor of activated T-cells 5 isof... | 3.00E-04 |
| YKR020W | <i>VPS51</i>   | kinectin 1 [Homo sapiens]                     | 3.00E-03 |
| YLR417W | <i>VPS36</i>   | CGI-145 protein [Homo sapiens]                | 5.00E-03 |
| YMR058W | <i>FET3</i>    | PREDICTED: similar to hephaestin [Homo sap... | 7.00E-03 |
| YKR020W | <i>VPS51</i>   | kinectin 1 [Homo sapiens]                     | 3.00E-03 |

<sup>1</sup> Description downloaded as described under GOnet in Materials and Methods

<sup>2</sup> Homologs were identified using NCBI BLAST and batch searching through GOnet;

The e-value measures the probability of the given alignment score under a random sequence model.
